1 **Ubiquitylome Analysis Reveals a Central Role for the Ubiquitin-Proteasome**  
2 **System in Plant Innate Immunity**

3

4 Xiyu Ma<sup>1\*</sup>, Chao Zhang<sup>2\*</sup>, Do Young Kim<sup>3,4\*</sup>, Yanyan Huang<sup>1</sup>, Ping He<sup>1</sup>, Richard D.  
5 Vierstra<sup>3,5#</sup>, and Libo Shan<sup>1,2#</sup>

6

7 **Author Affiliations:**

8 <sup>1</sup>Department of Biochemistry and Biophysics, Texas A&M University, College Station, TX  
9 77843, USA

10 <sup>2</sup>Department of Plant Pathology and Microbiology, Texas A&M University, College Station,  
11 TX  
12 77843, USA

13 <sup>3</sup>Department of Genetics, 425-G Henry Mall, University of Wisconsin-Madison, Madison, WI  
14 53706, USA

15 <sup>4</sup>Advanced Bio Convergence Center, Pohang Technopark, Gyeong-Buk, South Korea,  
16 37668

17 <sup>5</sup>Department of Biology, Washington University in St. Louis, St. Louis, MO 63130, USA

18

19 \*These authors contribute equally.

20 #Corresponding authors:

21 Libo Shan

22 Tel: 979-845-8818; E-mail: [lshan@tamu.edu](mailto:lshan@tamu.edu)

23

24 Richard D. Vierstra

25 Tel: 314-935-5058; E-mail: [rdvierstra@wustl.edu](mailto:rdvierstra@wustl.edu)

26

27 **One-sentence summary:** Proteome-wide catalogs of ubiquitylated proteins revealed a rapid  
28 engagement of the ubiquitin-proteasome system in Arabidopsis innate immunity.

29

30 **Keywords:** innate immunity, disease resistance, ubiquitylome, protein ubiquitylation,  
31 proteasome, mass spectrometry, Arabidopsis

32

33 **Manuscript information:** 47 pages and 8 figures.

34 **ABSTRACT**

35

36 Protein ubiquitylation profoundly expands proteome functionality and diversifies cellular  
37 signaling processes, with recent studies providing ample evidence for its importance to plant  
38 immunity. To gain a proteome-wide appreciation of ubiquitylome dynamics during immune  
39 recognition, we employed a two-step affinity enrichment protocol based on a 6His-tagged  
40 ubiquitin (Ub) variant coupled with high sensitivity mass spectrometry to identify *Arabidopsis*  
41 proteins rapidly ubiquitylated upon plant perception of the microbe-associated molecular  
42 pattern (MAMP) peptide flg22. The catalog from two-week-old seedlings treated for only 30  
43 minutes with flg22 contained nearly 1,000 conjugates, 150 Ub footprints, and all seven types  
44 of Ub linkages, and included previously uncharacterized conjugates of immune components,  
45 such as RECEPTOR-LIKE KINASE 1 (RKL1) shown to negatively regulate plant immunity.  
46 *In vivo* ubiquitylation assays confirmed modification of several candidates upon immune  
47 elicitation, and revealed distinct modification patterns and dynamics for key immune  
48 components, including poly- and monoubiquitylation, as well as induced or reduced levels of  
49 ubiquitylation. Gene ontology and network analyses of the collection also uncovered rapid  
50 modification of the Ub-proteasome system itself, suggesting a critical auto-regulatory loop  
51 necessary for an effective MAMP-triggered immune response and subsequent disease  
52 resistance. Included targets were UBIQUITIN-CONJUGATING ENZYME 13 (UBC13) and  
53 proteasome component REGULATORY PARTICLE NON-ATPASE SUBUNIT 8b (RPN8b),  
54 whose subsequent biochemical and genetic analyses implied negative roles in immune  
55 elicitation. Collectively, our proteomic analyses further strengthened the connection  
56 between ubiquitylation and flg22-based immune signaling, identified novel components and  
57 pathways regulating plant immunity, and increased the database of ubiquitylated substrates  
58 in plants.

59

## 60 INTRODUCTION

61 Post-translational modifications (PTMs), such as phosphorylation, methylation, acetylation,  
62 glycosylation, myristoylation, and ubiquitylation diversify protein behaviors, thus increasing  
63 the functionality and regulation of the proteome. As one of the most abundant PTMs,  
64 ubiquitylation is involved in nearly all physiological and signaling processes in plants,  
65 including hormone perception, photomorphogenesis, circadian rhythms, self-incompatibility,  
66 and defense against biotic and abiotic challenges (Guerra and Callis, 2012; Trujillo and  
67 Shirasu, 2010; Vierstra, 2009; Zhou and Zeng, 2017). Attachment of the 76-amino acid  
68 ubiquitin (Ub) moiety occurs most commonly to accessible lysines (K) within the target via an  
69 isopeptide bond that links to the carboxyl (C)-terminal glycine of Ub.

70 This conjugation is typically mediated through a stepwise enzymatic cascade  
71 consisting of a Ub-activating enzyme (UBA, or E1), a Ub-conjugating enzyme (UBC, or E2),  
72 and finally, a Ub-protein ligase (or E3), the latter of which has greatly expanded and  
73 diversified in plants to recognize a plethora of substrates. Additional Ubs can become  
74 attached to one or more of the seven lysine residues (K6, K11, K27, K29, K31, K48, and  
75 K63) or the amino (N)-terminal amide nitrogen within previously attached Ubs, resulting in a  
76 myriad of poly-Ub chain architectures that provide additional functional diversity (Komander  
77 and Rape, 2012; Vierstra, 2009). The most common internal linkage involves lysine 48  
78 (K48) whose poly-Ub chains mainly target proteins for breakdown by the 26S proteasome, a  
79 multisubunit proteolytic complex that recognizes the Ub moieties (Vierstra, 2009; Zhou and  
80 Zeng, 2017). Although not as well understood in plants (Paez Valencia et al., 2016;  
81 Romero-Barrios and Vert, 2018; Zhou and Zeng, 2017), other types of poly-Ub linkages,  
82 involving K6, K11, K27, K29, K33, or K63, and monoubiquitylation in which only a single Ub  
83 is attached, have also been connected to many intracellular events, including protein  
84 trafficking, signal transduction, protein-protein interactions, and protein degradation through  
85 autophagy (Komander and Rape, 2012).

86 In recent years, a myriad of plant defenses against a range of pathogens has  
87 become apparent. The front line of defense is to block pathogen entry by erecting physical  
88 barriers, such as wax layers, cell walls, cuticular lipids, cutin, and callose, which can be  
89 strengthened during infection (Thordal-Christensen, 2003). As a second line of defense,  
90 plants rely on innate immune responses to fend off infections internally, which are elicited  
91 upon recognition of pathogen- or microbe-associated molecular patterns (PAMPs/MAMPs)  
92 for pattern-triggered immunity (PTI), or pathogen-encoded effectors for effector-triggered  
93 immunity (ETI), which are encoded within the pathogen (Spoel and Dong, 2012; Zhou and  
94 Zhang, 2020). The host receptors known to detect these patterns/effectors are either  
95 receptor-like kinases (RLKs) or receptor-like proteins (RLPs) (Böhm et al., 2014; Couto and

96 Zipfel, 2016). The best understood is the RLK receptor FLAGELLIN SENSING 2 (FLS2) and  
97 its co-receptor BRASSINOSTEROID INSENSITIVE 1-ASSOCIATED KINASE 1 (BAK1) that  
98 recognize the bacterial 22-amino-acid flagellin epitope - flg22. Subsequently, PTI signaling  
99 is relayed through receptor-like cytoplasmic kinases (RLCKs), the mitogen-activated protein  
100 kinase (MAPK) cascade, and transcription factors, that trigger diverse immune responses,  
101 including the production of reactive oxygen species (ROS) and the stress hormone ethylene  
102 (Couto and Zipfel, 2016; Yu et al., 2017). Pathogen effectors are recognized directly or  
103 indirectly by NUCLEOTIDE-BINDING SITE LEUCINE-RICH REPEAT (NBS-LRR) proteins  
104 (NLRs), which often leads to localized cell death at the infection sites known as the  
105 hypersensitive response (HR) (Cui et al., 2015). The defense hormone salicylic acid (SA) is  
106 indispensable for NLR-triggered HR (Cui et al., 2015).

107 Protein ubiquitylation is also emerging as a dynamic process in both PTI and ETI  
108 signaling (Adams and Spoel, 2018; Cheng and Li, 2012; Zhou and Zeng, 2017). As  
109 examples, the MAMP receptor FLS2 is ubiquitylated upon ligand engagement by the E3s  
110 PLANT U-BOX 12 (PUB12) and PUB13, resulting in FLS2 degradation (Lu et al., 2011; Zhou  
111 et al., 2015), while PUB13 also directs the ubiquitylation and degradation of LYSIN MOTIF  
112 RECEPTOR KINASE 5 (LYK5), an RLK that recognizes the fungal cell wall polysaccharide  
113 chitin (Liao et al., 2017). The RLCK *BOTRYTIS*-INDUCED KINASE 1 (BIK1), which  
114 provides a convergent signaling hub downstream of multiple MAMP receptors, is strongly  
115 regulated by Ub addition (Ma et al., 2020; Wang et al., 2018). Two U-box E3s, PUB25, and  
116 PUB26 polyubiquitylate BIK1 to control its steady-state levels, while the RING-type E3  
117 ligases, RING-H2 FINGER A3A (RHA3A) and RHA3B, monoubiquitylate BIK1 to direct its  
118 endocytosis and signaling activation (Ma et al., 2020; Wang et al., 2018). Additionally, the  
119 PUB22, PUB23, and PUB24 E3s work collectively to negatively regulate PTI responses  
120 through modification of EXOCYST SUBUNIT EXO-70 FAMILY PROTEIN B2 (EXO70B2),  
121 which promotes vesicle trafficking (Stegmann et al., 2012). Levels of several NLR proteins,  
122 including RESISTANT TO *PSEUDOMONAS SYRINGAE* 2 (RPS2) and SUPPRESSOR OF  
123 *npr1-1* CONSTITUTIVE 1 (SNC1), are also regulated by CONSTITUTIVE EXPRESSOR OF  
124 PR GENES 1 (CPR1), which is the target-recognition F-Box subunit within an SKP1-  
125 CULLIN1-F-BOX (SCF) E3 complex (Cheng et al., 2011; Gou et al., 2012). Despite these  
126 examples, a systematic investigation of ubiquitylation during plant immune activation is  
127 currently lacking.

128 Recent advance in proteomics has enabled high-throughput and comprehensive  
129 views of ubiquitylomes under specific physiological conditions. The first catalog was  
130 generated with yeast in which wild-type Ub was replaced by a 6His-tagged variant to enable  
131 enrichment of ubiquitylated proteins by nickel-nitrotrilotriacetic acid (Ni-NTA) affinity

132 chromatography under denaturing conditions, followed by liquid chromatography-mass  
133 spectrometric analysis (LC-MS) of the trypsinized preparations (Peng et al., 2003). Sarraco  
134 et al. (2009) then adopted this strategy for plants through the creation of a transgenic  
135 *Arabidopsis* line that constitutively expresses a hexa-6His-Ub concatamer which is post-  
136 translationally processed into functional 6His-Ub monomers. Subsequently, Ub-binding  
137 domains were exploited for the additional enrichment needed for more complex proteomes  
138 (Maor et al., 2007). Further improvements included Tandem-repeated Ub-Binding Entities  
139 (TUBEs) in which natural Ub-binding domains were oligomerized to increase enrichment and  
140 yield (Hjerpe et al., 2009). By combining TUBEs with the Ni-NTA affinity chromatography,  
141 stringent purifications were possible, which enabled the confident detection of over 1,000  
142 ubiquitylated proteins in *Arabidopsis* (Aguilar-Hernandez et al., 2017; Kim et al., 2013).  
143 Notably, a number of Ub targets associated with disease resistance were identified.

144 Here, we employed this improved two-step TUBEs purification approach coupled with  
145 deep MS analysis of *Arabidopsis* seedlings before and shortly after exposure to flg22. The  
146 resulting ubiquitylome catalog revealed extensive proteome-wide changes soon after MAMP  
147 perception and uncovered a large number of ubiquitylated candidates potentially connected  
148 to plant innate immunity. We further observed by *in vivo* ubiquitylation assays distinct  
149 ubiquitylation patterns and dynamics for several immunity components, including key  
150 regulators that were modified by multiple ubiquitylation events. One target was the  
151 previously uncharacterized receptor protein kinase RECEPTOR-LIKE KINASE 1 (RKL1) that  
152 appears to negatively impact plant immunity. Interestingly, several Ub-proteasome pathway  
153 components were also confirmed as Ub targets upon PTI immune elicitation, including the  
154 E2 UBC13 and proteasome subunit REGULATORY PARTICLE NON-ATPASE SUBUNIT 8b  
155 (RPN8b). Taken together, our study identified novel connections between the Ub-  
156 proteasome system (UPS) and pathogen immunity as well as provided a valuable resource  
157 to further study this PTM during immune activation.

158

## 159 **RESULTS**

### 160 **TUBEs enrichment of ubiquitylated *Arabidopsis* proteins upon flg22 treatment**

161 To gain a global perspective of ubiquitylation during PTI elicitation, we employed a two-step  
162 TUBEs purification protocol to enrich for ubiquitylated proteins soon after exposure of two-  
163 week-old *A. thaliana* ecotype Col-0 seedlings to flg22 (Kim et al., 2013), which was based on  
164 a transgenic line harboring a synthetic *UBQ* gene encoding six 6His-Ub repeats expressed  
165 under the control of the Cauliflower mosaic virus (CaMV) 35S promoter (Sarraco et al.,  
166 2009). The polymer is processed by endogenous deubiquitylases (DUBs) to release tagged  
167 and fully functional Ub monomers (Isono and Nagel, 2014). In the first step, extracts from

168 *hexa-6His-UBQ* seedlings either untreated or treated for only 30 min to flg22 were prepared  
169 in a non-denaturing buffer containing the non-ionic detergent Triton X-100 and a protease  
170 inhibitor cocktail to minimize DUB activities that would disassemble Ub conjugates post  
171 homogenization, and then enriched for Ub-bearing species by TUBEs chromatography  
172 (Hjerpe et al., 2009; Raasi et al., 2004), using as the ligand four copies of the Ub-Associated  
173 Domain (UBA) sequence from human hHR23A interconnected through a short flexible linker,  
174 and fused with GLUTATHIONE S-TRANSFERASE (GST) (Figure 1A). Previous studies  
175 show that this GST-4X(UBA) fusion binds effectively to native Ub-conjugates bearing various  
176 chain topologies from *Arabidopsis*, thus allowing us to interrogate its near complete  
177 ubiquitylome (Aguilar-Hernandez et al., 2017; Kim et al., 2013). In the second step, we  
178 enriched for poly-His-containing proteins via Ni-NTA chromatography under strong  
179 denaturing conditions using buffers containing 7 M guanidine-HCl and 8 M urea for the  
180 application and washing steps, respectively, followed by elution with a buffer containing 8 M  
181 urea and 400 mM imidazole (Figure 1B).

182 As seen in Figure 1C and D, eluants from the TUBEs and Ni-NTA columns prepared  
183 with control and flg22-treated *hexa-6His-UBQ* seedlings had substantially more ubiquitylated  
184 species than those obtained from wild-type seedlings, as detected by immunoblot analysis  
185 with rabbit anti-Ub antibodies. They appeared particularly enriched in high molecular mass  
186 Ub conjugates, with limited amounts of free Ub or the Ub dimer that were easily seen in total  
187 seedling extracts (Figure 1D). The main contaminant was RIBULOSE-1,5-BISPHOSPHATE  
188 CARBOXYLASE/OXYGENASE (Rubisco), which is often recognized by antibodies  
189 generated in rabbits.

190

### 191 **Identification of Ub-conjugates by LC-MS/MS**

192 Ub-conjugates from the *hexa-6HIS-UBQ* plants were trypsinized, separated by reversed-  
193 phase nanoflow liquid chromatography (LC), and subjected to tandem MS (MS/MS) using a  
194 Velos LTQ mass spectrometer in the high energy collision mode (Figure 1B). Peptides were  
195 matched to the *Arabidopsis* ecotype Col-0 protein database (IPI database, version 3.85;  
196 <http://www.arabidopsis.org>) using SEQUEST, based on the identification of two or more  
197 different matching peptides with a  $\leq 1\%$  false discovery rate (FDR), or if a single matching  
198 peptide of equivalent stringency was identified that harbored a canonical Ub footprint (Kim  
199 et al., 2013). This footprint was detected by the presence of a di-Gly remnant (Gly-Gly) from  
200 Ub isopeptide linked to a lysine within the peptide, which increased the monoisotopic mass  
201 of the residue by 114 Da as well as protected the site from trypsin cleavage (Peng et al.,  
202 2003; Saracco et al., 2009). To help eliminate contaminants that bind non-specifically to the  
203 TUBEs and/or Ni-NTA columns, a background LC-MS/MS database was also generated with

204 wild-type plants that underwent the same two-step affinity protocol; these proteins were  
205 subtracted from *hexa-6HIS-UBQ* datasets to obtain the final ubiquitylome catalog (Kim et al.,  
206 2013). In total, we generated MS/MS datasets from three biological replicates for control,  
207 untreated, and flg22-treated seedlings for final comparisons.

208 The summation of this MS analysis enabled the detection of 391 Ub conjugates in  
209 control samples (204, 210, 250 proteins for biological replicates 1, 2, 3, respectively) and  
210 570 Ub conjugates in the flg22-treated samples (391, 400, 142 proteins for biological  
211 replicates 1, 2, 3, respectively) (Supplemental Table 1). Notably, 90 proteins in the control  
212 samples and 88 proteins in the flg22-treated samples were consistently identified in all three  
213 biological replicates, which likely represented a high abundance of ubiquitylated species.  
214 When combined, we uncovered 961 ubiquitylated proteins with high confidence; 690 were  
215 confined to either control or flg22-treated samples, whereas 271 proteins were present in  
216 both (Figure 2A). We detected 299 proteins unique to the flg22-treated samples versus 120  
217 proteins unique to the control samples, implying that the PTI elicitation rapidly and markedly  
218 increases ubiquitylation in *Arabidopsis* (Figure 2A).

219

## 220 **Gene ontology analyses of flg22-treated and -untreated ubiquitylomes**

221 To gain a global perspective for how ubiquitylation is influenced by immune elicitation, we  
222 classified the identified targets in the control and flg22-treated ubiquitylomes based on their  
223 known or predicted functions within the Gene Ontology (GO) database using the DAVID  
224 Functional Annotation Tool (Huang da et al., 2009). As shown in Figure 2B, the total number  
225 of significantly enriched GO terms (FDR <0.05) was larger for the flg22-treated ubiquitylome  
226 than for that for the control for the three main GO domains ('Biological Processes': 104 vs.  
227 82, 'Molecular Functions': 59 vs. 45, and 'Cellular Components' 74 vs. 62), and were  
228 noticeably more dedicated to pathogen-related events. Enrichments included the GO terms  
229 'defense response to fungus', and 'innate immune response', which were found only in the  
230 flg22-treated ubiquitylome, while the related terms 'defense response to bacterium',  
231 'regulation of stomatal movement', 'defense response by callose deposition', and 'oxidation-  
232 reduction process' were more significantly enriched (Figure 2B, C).

233 As compared to the total proteome, we also saw significant enrichment for GO terms  
234 associated with 'Ub-dependent protein catabolic process' (Biological process), and 'Cul4-  
235 RING E3 Ub ligase' (Cellular components) in both control and flg22-treated ubiquitylomes,  
236 as were the GO terms related to stress, such as 'response to salt stress' and 'response to  
237 cold stress' (Figure 2B). Strikingly, this enrichment in Ub-related events was more robust in  
238 the flg22-treated versus control ubiquitylomes (3.7-fold vs. 2.4-fold for 'ubiquitin-dependent  
239 protein catabolic process' and 5.5-fold vs. 3.2-fold for 'Cul4-RING E3 Ub ligase',

240 respectively). A prevalence for UPS components in the flg22-treated samples was also  
241 evident for proteins associated with 'proteasomes' (11.4-fold vs. 9.2-fold, respectively; Figure  
242 2C). Taken together, this non-targeted MS analysis directly connected rapid flg22-induced  
243 ubiquitylation to Arabidopsis proteins associated with immunity and the UPS itself.

244

### 245 **Global ubiquitylation of immunity-related proteins**

246 Among the identified Ub conjugates were many key immunity-related proteins (Table 1). To  
247 link these ubiquitylated species to immune signaling globally, we generated an interaction  
248 network using the Search Tool for Retrieval of Interacting Genes/Proteins (STRING)  
249 database (Szklarczyk et al., 2015), which revealed an interconnected web with defense-  
250 related proteins often situated at key hubs (Figure 3A, B). Examples included plasma  
251 membrane-resident leucine-rich repeat-RLKs (LRR-RLKs), such as RECEPTOR-LIKE  
252 KINASE 7 (RLK7) and SUPPRESSOR OF *BIR1-1*/EVERSHED (SOBIR1/EVR) that interact  
253 with multiple LRR-RLP receptors (Figure 3A, B). Whereas SOBIR1 serves as a common  
254 component in RLP-mediated plant immunity (Albert et al., 2015; Liebrand et al., 2014), RLK7  
255 is a receptor for PAMP-INDUCED PEPTIDE 1 (PIP1), which acts as a damage-associated  
256 molecular pattern (DAMP) to amplify plant immune signaling (Hou et al., 2014). Additionally,  
257 LysM RLK1-INTERACTING KINASE 1 (LIK1), which was specific to the flg22-treated  
258 ubiquitylome, has been shown to interact with the fungal chitin receptor complex component  
259 CERK1 to positively regulate resistance against necrotrophic pathogens (Le et al., 2014).

260 Downstream of the immune receptor complexes are sequential phosphorylation  
261 events involving MAPK cascades driven by MAPK KINASE KINASES (MAPKK/MEKK),  
262 MAPK KINASES (MAPKK/MKK), and MAPKS (MPK) components (Meng and Zhang, 2013).  
263 Notably, MKK5, MPK3, and MPK11, which become phosphorylated upon flg22 perception,  
264 were detected here, with MKK5 and MPK3 only identified in the flg22-treated ubiquitylome  
265 (Figure 3B). Heterotrimeric G-proteins, consisting of G $\alpha$ , G $\beta$ , and G $\gamma$  subunits, act as  
266 molecular switches to mediate diverse signal transduction events (Urano et al., 2013). In  
267 particular, *ARABIDOPSIS* G PROTEIN  $\beta$ -SUBUNIT1 (AGB1), which associates with FLS2  
268 and regulates BIK1 stability during plant PTI (Liang et al., 2016; Liu et al., 2013), was  
269 identified in the flg22-treated samples. Ubiquitylated forms of RECEPTOR FOR  
270 ACTIVATED C KINASE (RACK)-1B and RACK1C, which scaffolds and connects  
271 heterotrimeric G proteins with MAPK cascades to form a unique signaling pathway in plant  
272 immunity (Cheng et al., 2015), were identified in both control and flg22-treated  
273 ubiquitylomes, or only the flg22-treated ubiquitylome, respectively.

274 Protein trafficking, regulated by a cascade of factors such as small GTPases from  
275 Rab subfamilies, also plays important roles in plant immunity (Gu et al., 2017). RabE1D,



276 identified here in the flg22-treated ubiquitylome, is associated with Golgi and the plasma  
277 membrane and might regulate the apoplast secretion of anti-microbial proteins, such as  
278 PATHOGENESIS-RELATED PROTEIN 1 (PR1) that induce resistance against  
279 *Pseudomonas syringae* pv. *tomato* (*Pst*) DC3000 (Speth et al., 2009b). Likewise, the E3  
280 KEEP ON GOING (KEG), which localizes to the trans-Golgi network/early endosome  
281 (TGN/EE) compartments and is essential for TGN/EE-mediated secretion of PR1 and  
282 papain-like Cys protease C14 (Gu and Innes, 2011) appears to be ubiquitylated by a flg22-  
283 induced event (Figure 3B).

284 ETI components were also identified as flg22-specific ubiquitylation substrates.  
285 Included were four uncharacterized NLR proteins (AT1G53350, AT1G63350, AT5G45240,  
286 and AT5G48770) along with ENHANCED DISEASE RESISTANCE 1 (EDS1), which is a  
287 nucleocytoplasmic lipase-like protein indispensable for multiple TOLL-INTERLEUKIN 1  
288 RECEPTOR (TIR) domain NLR-mediated resistance events (Cui et al., 2015). Proteins  
289 implicated in long-distance resistance were identified in the flg22-treated ubiquitylome, such  
290 as the HEAT-repeat protein ILITHYIA (ILA) that encourages systemic acquired resistance  
291 (Monaghan et al., 2010). The peroxisome-localized glycol hydrolase PENETRATION2  
292 (PEN2) was seen in all control and flg22-treated samples and thus considered to be a high  
293 abundance Ub target. PEN2, together with PEN1 and PEN3, actuate a cell wall-based  
294 defense against non-adapted pathogens by limiting pathogen entry (Figure 3B) (Clay et al.,  
295 2009; Collins et al., 2003; Fuchs et al., 2016). Similarly, the lignin biosynthetic enzymes,  
296 CINNAMYL ALCOHOL DEHYDROGENASE 4 (CAD4), identified in both control and flg22-  
297 treated ubiquitylomes, and CAD5 identified only in flg22-treated ubiquitylomes, likely protect  
298 against pathogen invasion by modifying the lignin content of cell walls (Tronchet et al.,  
299 2010). The callose synthase POWDERY MILDEW RESISTANT 4 (PMR4), which is required  
300 for wound- and/or pathogen-induced callose formation (Meyer et al., 2009; Wawrzynska et  
301 al., 2010), was also found in both datasets (Figure 3B). Taken together, our ubiquitylome  
302 profiles implicate Ub addition in multiple defense responses ranging from the preformed cell  
303 wall-based protection, to inducible PTI and ETI, and systemic defense (Figure 3B).

304

### 305 **Distinct ubiquitylation patterns and dynamics of immunity-related proteins upon flg22** 306 **elicitation**

307 To examine more closely the ubiquitylation dynamics (+/-flg22) of several immunity-related  
308 substrates, we exploited a previously established *in vivo* ubiquitylation system in which  
309 FLAG-tagged Ub (FLAG-Ub) is co-expressed with HA- or myc-tagged targets in wild-type  
310 Arabidopsis leaf protoplasts (Zhou et al., 2014). Ubiquitylated proteins are enriched by

311 immunoprecipitation with anti-FLAG antibody beads and then probed by immunoblot  
312 analysis with anti-HA or anti-myc antibodies to assay for possible ubiquitylated species.

313 As shown in Figure 4A, we successfully confirmed the ubiquitylation of MPK3, MKK5,  
314 SOBIR1, and EDS1 using this *in vivo* system combined with HA or myc-tagged versions.  
315 For MPK3-HA, multiple ubiquitylated species were evident in anti-FLAG immunoprecipitates  
316 with a dominant form seen at ~52 kDa. Being ~8 kDa bigger than that of unmodified MPK3-  
317 HA (~43.8 kDa), we consider it likely that it represents a monoubiquitylated form. Notably,  
318 ubiquitylation of MPK3-HA was transiently enhanced soon after flg22 treatment (10 min) but  
319 quickly returned to a basal level of modification at 30 min (Figure 4A), even though the levels  
320 of unmodified MPK3-HA remained steady for one hr of flg22 treatment (Figure 4A),  
321 suggesting that MPK3 ubiquitylation triggered by flg22 helps relay the flg22 signal. By  
322 contrast, modification of MKK5-myc, easily seen by a strong monoubiquitylated species,  
323 appeared to be constitutive, *i.e.*, its level was unchanged by flg22 elicitation (Figure 4B). For  
324 both SOBIR1-HA and EDS1-HA, poly-ubiquitylated species accumulated in the *in vivo*  
325 system. While, the smear of high molecular mass conjugates for SOBIR1 was strongly  
326 enhanced upon flg22 treatment, they were diminished for EDS1 (Figure 4C and 4D). Taken  
327 together, we confirmed the ubiquitylation of candidate proteins using this cell-based assay,  
328 which revealed surprisingly distinct ubiquitylation patterns and dynamics for the candidates  
329 upon immune elicitation with flg22.

330

### 331 **Ubiquitylation of RKL1 and its role in plant immunity**

332 The LRR III protein RECEPTOR-LIKE KINASE 1 (RKL1), identified here as a flg22-triggered  
333 ubiquitylation substrate, was previously shown to modulate the activity of the aquaporin  
334 PLASMA MEMBRANE INTRINSIC PROTEIN (PIP) family during osmotic and oxidative  
335 stress together with its close homolog RLK902 (Bellati et al., 2016). Intriguingly, while RKL1  
336 was not yet connected to pathogen defense, RLK902 had been shown to transmit an  
337 immune signal by phosphorylating the RLCK BRASSINOSTEROID-SIGNALING KINASE 1  
338 (BSK1) (Zhao et al., 2019). The RKL1 protein harbors a five-LEUCINE RICH REPEAT  
339 (LRR) extracellular domain, a transmembrane domain, and a cytosolic kinase domain  
340 (Figure 5A), and is mainly expressed in the stomata, hydathodes, and trichomes of young  
341 rosette leaves, and floral organ abscission zones based on transcriptomic analyses (Tarutani  
342 et al., 2004). When expressed in our leaf protoplast system with FLAG-Ub, we found that  
343 RKL1-HA was constitutively poly-ubiquitylated *in vivo*, despite our proteomic analyses of  
344 seedlings which found these species only in flg22-treated samples (Figure 5B).

345 To further characterize the role(s) of RKL1 in PTI, we assayed both MAMP-induced  
346 ROS production and bacteria disease spread, using a T-DNA insertion mutant compromising

347 RKL1 function available from the SALK insertion collection (Alonso et al., 2003). The *rkl1-1*  
348 mutant (*SALK\_099094*) bears an insertion within the first exon (Tarutani et al., 2004), which  
349 was confirmed here by genomic PCR analysis using gene-specific and T-DNA border  
350 primers (Figure S1A). When compared to wild-type *Arabidopsis* Col-0 leaves, we found that  
351 homozygous *rkl1-1* leaves displayed enhanced ROS production upon flg22 treatment based  
352 on a chemiluminescence assay quantifying luminol oxidation. We also conducted an assay  
353 for disease spread by infiltrating *Arabidopsis* leaves with the bacterial pathogen *Pst* DC3000  
354 and then measuring bacterial numbers 2 days afterwards. As shown in Figure 5D, the *rkl1-1*  
355 mutant displayed significantly less infection as compared to wild type, consistent with a  
356 robust defense (Figure 5D). Together, the data implicated for the first time that RKL1 is a  
357 negative regulator of plant immunity, which is possibly influenced by ubiquitylation.

358

### 359 **Ubiquitylation of UPS components**

360 As revealed above (Table 2; Figures 2 and 3), multiple UPS components were preferentially  
361 identified in flg22-treated ubiquitylome. Included were the E1 UBA1, the E2 isoforms  
362 UBC13, and UBC35 (UBC13A), the E3 components CULLIN 1 (CUL1), CUL4, and UB-  
363 PROTEIN LIGASE 5 (UPL5), components of the 26S proteasome, and the DUBs Ub-  
364 Specific Proteases (UBP)-13 and UBP24 and a predicted Ub-Carboxy-Terminal Hydrolase  
365 (UCH) (At4g24320) expected to release free Ub monomers from poly-Ub chains and poly-Ub  
366 translation products. UPL5 is part of the single polypeptide HECT E3 family. By contrast,  
367 CUL1, together with S-PHASE KINASE-ASSOCIATED PROTEIN 1 (SKP1), RING BOX 1  
368 (RBX1), and one of possibly >700 F-box protein variants, assemble into SCF-type E3  
369 complexes (Vierstra, 2009), while the CUL4 scaffolds DNA DAMAGE-BINDING (DDB)-type  
370 E3 complexes assembled with RBX1, and one of over 85 DWD box-containing DDB proteins  
371 (Vierstra, 2009). Previously, DDB1 was implicated in *PR* gene expression and resistance to  
372 *Agrobacterial* infection in tomato (Liu et al., 2012b), which might explain the connection  
373 between CUL4 and immune elicitation, while UPL5 is required for SA- and  
374 NONEXPRESSER OF *PR* GENES 1 (NPR1)-mediated plant immunity (Furniss et al., 2018c).  
375 Our discovery of the DUBs UBP13, UBP24, and a UCH in the flg22-treated ubiquitylome  
376 implies that the release of Ub from targets is also a regulatory step in immune elicitation.

377 A common fate for ubiquitylated proteins is turnover by the 26S proteasome. This  
378 multisubunit particle consists of a 20S cylinder-shaped core protease (CP) that houses the  
379 peptidase activities, which is capped at one or both ends by the 19S regulatory particle (RP)  
380 that assist in substrate recognition, poly-Ub chain removal, unfolding, and finally  
381 translocation of the unfolded protein into to the CP for digestion (Marshall and Vierstra,  
382 2018; Zhou and Zeng, 2017). The CP is assembled from four stacked heptameric rings of

383 related  $\alpha$  (PAA-PAG) and  $\beta$  (PBA-PBG) subunits arranged in an  $\alpha\beta\beta\alpha$  configuration. By  
384 contrast, RP is created by a ring of six RP ATPases (RPT1-RPT6) together with a collection  
385 of non-ATPase subunits (RPN1-3 and RPN5-14). The RPT ring provides the unfoldase  
386 activities that prepare substrates for CP import, RPN10, RPN13, and possible RPN14/SEM1  
387 serves as Ub receptors, and RPN11 is one of the several proteasome-bound DUBs that help  
388 release the Ub moieties prior to proteolysis. Unexpectedly, we identified PAC1 ( $\alpha$ 3), PBB1  
389 ( $\beta$ 2), and PBE2 ( $\beta$ 5) within the CP, RPT3, and RPT6b within the RP ATPase ring, and  
390 RPN2b, RPN3a, RPN6, and RPN8a/b in the RP cap, as part of the flg22-induced  
391 ubiquitylome (Figure 2B; Tables 1 and 2). Additional RPN subunits were identified (RPT1a,  
392 RPT4b, RPT5b, RPN1a, RPN7, and RPN11) in the ubiquitylome from untreated samples as  
393 well. While this extensive modification of proteasomes is consistent with its ubiquitylation  
394 helping remove damaged particles via autophagy more generally (Marshall et al., 2015), and  
395 possibly as a target of during pathogen attack more specifically (Ustin et al., 2017), the  
396 preferential and rapid modification of some subunits after flg22 treatment also suggested a  
397 direct host role for this modification during the immune defense. As the selective  
398 modifications of several proteasome subunits occurred within 30 min of flg22 treatment and  
399 long before any impact on 26S proteasome synthesis, we propose that they reflect early  
400 defense signaling events.

401

#### 402 **Flg22 induces UBC13 ubiquitylation and its role in plant immunity**

403 We further connected the ubiquitylation target UBC13 (AT3G46460) to flg22 perception by  
404 studying its ubiquitylation profile and impact on pathogen defense. (It should be mentioned  
405 that UBC13 is unrelated to the UBC35 and UBC36 subfamily in *Arabidopsis*, which is  
406 unfortunately also named UBC13A (At1g78870) and UBC13B (At1g16890), respectively  
407 (Wen et al., 2008).) As shown in Figure 6A, we confirmed that UBC13 is ubiquitylated using  
408 a UBC13-HA variant co-expressed in Arabidopsis leaf protoplasts with FLAG-Ub. Only a  
409 monoubiquitylated form was evident in the immunoprecipitates from both untreated and  
410 flg22-treated samples; intriguingly, its abundance was slightly elevated upon flg22 exposure.  
411 Whether this addition was directed by autoubiquitylation or by a second factor (E3?) is not  
412 currently known.

413 To examine whether UBC13 influences immune signaling, we examined two T-DNA  
414 insertion mutants *ubc13-1* (CS389049) and *ubc13-2*, (CS389056) available from the GABI-  
415 Kat collection (Kleinboelting et al., 2012). Both mutants were predicted to harbor a T-DNA  
416 sequence within the 6<sup>th</sup> exon of *UBC13*, which was confirmed by genomic PCR with gene-  
417 specific and T-DNA border primers (Figure S1B, C). When compared to wild-type  
418 *Arabidopsis* Col-0 leaves, homozygous *ubc13-2* seedlings displayed enhanced ROS

419 production upon flg22 treatment, based on the chemiluminescence assay, and were  
420 significantly more resistant to infection spread by the pathogen *Pst* DC3000 (Figure 5D).  
421 Confirmation that the *ubc13* mutations were responsible was provided using  
422 complementation studies that attempted to rescue the *ubc13-2* phenotypes with a transgene  
423 expressing UBC13-HA. Both ROS production and infectivity by the *Pst* DC3000 pathogen  
424 was returned to wild-type levels in homozygous *UBC13-HA ubc13-2* plants (Figure 6B-D).  
425 Together, our results imply that UBC13 negatively regulates plant immunity possibly by  
426 increasing the ubiquitylation state of UBC13.

427

### 428 **Flg22 induces polyubiquitylation of RPN8b to potentially impact plant immunity**

429 Our discovery that RPN8 is rapidly ubiquitylated upon treating *Arabidopsis* with flg22 was  
430 particularly intriguing because of its role in RP assembly where it associates with the DUB  
431 RPN11 to form an RPN11-RPN8 hetero-dimeric subcomplex (Murata et al., 2009; Smalle  
432 and Vierstra, 2004). Two paralogs of RPN8 (RPN8a, and RPN8b) assemble into the 26S  
433 particle in *Arabidopsis*. While the RPN8a isoform was more highly expressed based on  
434 mRNA levels and more commonly detected within the particle by MS (Book et al., 2010),  
435 only RPN8b was identified here in flg22-treated ubiquitylome, suggesting that its modification  
436 has a selective effect on 26S proteasome structure/function. As shown in Figure 7A, we  
437 confirmed the ubiquitylation of RPN8b by co-expressing an HA-tagged variant with FLAG-Ub  
438 in our *Arabidopsis* protoplast ubiquitylation system. Polyubiquitylated species of RPN8b-HA  
439 were evident in the immunoprecipitates from both untreated and flg22-treated samples, but  
440 their abundance was markedly enhanced upon flg22 treatment (Figure 7A).

441 To test whether RPN8b contributes to immune signaling, we analyzed two T-DNA  
442 insertion mutants available from the SALK insertion collection (*rpn8b-1*, SALK\_128568 and  
443 *rpn8b-2*, SALK\_023568). The *rpn8b-1* allele was previously shown to harbor a T-DNA  
444 sequence within the 1<sup>st</sup> intron (Palm et al., 2019), whereas we found that the *rpn8b-2* allele  
445 harbored a T-DNA sequence within the 2<sup>nd</sup> intron, both of which were confirmed here by  
446 genomic PCR with gene-specific and T-DNA border primers (Figure S1D). When compared  
447 to wild-type *Arabidopsis* Col-0 leaves, homozygous *rpn8b-1* mutant leaves showed an  
448 increase in ROS production upon flg22 perception by the chemiluminescence assay, and  
449 enhanced disease resistance upon infiltrating leaves with *Pst* DC3000 (Figure 7B-D).  
450 Complementation studies then connected RPN8b to the phenotypes described here;  
451 transgenic plants expressing RPN8b-HA under the control of the CaMV 35S promoter in the  
452 *rpn8b-1* background had their levels of flg22-induced ROS production and disease  
453 resistance restored to those in wild type (Figure 7B-D).

454 Collectively, the data implicated RPN8b as a negative regulator of plant immunity  
455 possibly through a process that enhances its ubiquitylation state. Whether the RPN8a  
456 isoform is similarly ubiquitylated and involved in disease resistance is not yet known.  
457 However, we note that suppression of ROS production in *rpn8b-1* seedlings by introducing  
458 *RPN8b-HA* was even more striking for one of the rescued lines, suggesting that  
459 overexpression of RPN8b might provide a dominant effect possibly by swamping out the  
460 function(s) of RPN8a (Figure 7B-D).

461

### 462 **Mapping ubiquitylation sites on Ub conjugates**

463 One strategy to demonstrate the impact of ubiquitylation on protein function/stability is to  
464 identify the modified lysine within the target and then block this modification through lysine to  
465 arginine substitutions. Consequently, a catalog of such sites is valuable, which can be  
466 detected by MS identification of Ub footprints, *i.e.*, trypsin-protected lysines bearing an  
467 isopeptide linked di-glycine moiety (+114 kDa) (see Figure 8A). Directed queries of all of  
468 our MS datasets identified 150 ubiquitylation sites from 120 *Arabidopsis* proteins (Table 3),  
469 which adds to the expanding list generated by other reports (Aguilar-Hernandez et al., 2017;  
470 Kim et al., 2013; Maor et al., 2007; Saracco et al., 2009). Notable footprints within disease-  
471 related proteins identified here, some of which were previously unmapped, included K668  
472 from CUL4, K301 from RPT6b, K502 and K507 from ARGONAUTE 7 (AGO7), K422 and  
473 K434 within the NLR proteins At1g63350 and At5g48770 respectively, K286 from UCH  
474 family protein At4g24320, and K736 from PHOSPHATIDYLINOSITOL-4-PHOSPHATE 5-  
475 KINASE (PIP5K2) (Table 3; Supplemental Table 2). Our datasets broadened the number of  
476 known Ub-attachment sites, especially within *Arabidopsis* proteins involved in flg22-triggered  
477 immune responses. Interestingly, noncanonical ubiquitylation sites detected in yeast or  
478 mammals, such as those involving serine, threonine, or cysteine residues (Iwai and  
479 Tokunaga, 2009; Okumoto et al., 2011; Shimizu et al., 2010) were not identified in here.  
480 Their absence is consistent with the previous ubiquitylome studies (Kim et al., 2013) and  
481 implies that these linkages are rarely, if at all, used by plants.

482

### 483 **Analysis of poly-Ub linkages**

484 Owing to the widespread observations that poly-Ub chains of various linkages confer unique  
485 functions to Ub (Komander and Rape, 2012; Vierstra, 2009), we examined how flg22  
486 treatment might affect the abundances of these polymers, using the diagnostic Ub footprint  
487 peptides for quantification based on peptide spectral matches (Peng et al., 2003). While  
488 footprints on each of the seven internal lysines (K<sup>6</sup>, K<sup>11</sup>, K<sup>27</sup>, K<sup>29</sup>, K<sup>33</sup>, K<sup>48</sup>, and K<sup>63</sup>) were  
489 identified (Figure 8B), none were seen using the N-terminal methionine, which would have

490 signified linear Ub concatemers (Iwai and Tokunaga, 2009). K48-linked Ub-Ub connections  
491 were the most abundant and comprised ~30% of the total detected linkages in both control  
492 and flg22-treated samples (Figure 8C). The second most abundant linkage involved K63  
493 and was followed in abundance by those involving K11, K29, K6, K33, and K27 (Figure 8B).  
494 Interestingly, flg22 exposure altered the relative abundance of poly-Ub linkages; the  
495 percentages of K6, K11, K33, and K48-linkages increased, while the percentages of K27,  
496 K29, and K63-linkages decreased (Figure 8B). The biological relevance of such changes  
497 awaits clarification.

498

## 499 **DISCUSSION**

500 Protein ubiquitylation is involved in nearly all aspects of eukaryotic biology, leading to a  
501 multitude of distinct signals within a variety of cellular and physiological contexts. In line with  
502 prior studies with yeast and mammals (Bennett et al., 2007; Ordureau et al., 2020), we show  
503 here and elsewhere (Aguilar-Hernandez et al., 2017) that dynamic and multifaceted changes  
504 in the plant ubiquitylome also occur. By employing a genetically encoded *hexa-6HIS-UBQ*  
505 variant coupled with an improved two-step enrichment protocol for ubiquitylated proteins,  
506 followed by deep LC-MS/MS analysis, we found profound and complex protein ubiquitylation  
507 patterns upon immune elicitation in *Arabidopsis*.

508 We propose that the use of two affinity-purification steps, with the second under  
509 strongly denaturing conditions, are essential to generate reliable catalogs, which resulted  
510 here in the detection of 961 possible substrates along with 150 ubiquitylation sites mapped  
511 onto 120 individual proteins. Among the 10 candidate proteins that we subsequently tested  
512 by *in vivo* conjugation assays, all were confirmed as ubiquitylated targets *in planta*. While it  
513 is possible that the ubiquitylated species seen in protoplasts were artifacts derived from  
514 ectopic expression, the fact that different types of linkages were seen (mono- versus  
515 polyubiquitylation) and that both increased and decreased responses were seen soon after  
516 flg22 elicitation argue otherwise.

517 We also identified Ub-Ub linkages involving all seven lysine residues based on the  
518 discovery of diagnostic footprint peptides, with those involving K48, K63, and K11 being the  
519 most abundant. Whereas K48 polyubiquitylation has been linked to 26S proteasome-  
520 mediated turnover, and K63 ubiquitylation has been connected to the endocytic  
521 internalization of plasma membrane proteins (Romero-Barríos and Vert, 2018), the functions  
522 of the other poly-Ub linkages remain largely unknown in *Arabidopsis* even though the total  
523 abundance of those linkages exceeds 40% of the total. In addition, we saw an increased  
524 number of ubiquitylated proteins (391 of control vs. 570 of flg22-treated) upon immune  
525 elicitation. Although the datasets were not derived from quantitative proteomic approaches,

526 a nearly 50% increase in the number of ubiquitylated proteins seen soon after immune  
527 elicitation, suggests a strong activation of the machinery that supports Ub transfer.

528 Notably, our flg22-induced datasets were obtained using seedlings treated for only  
529 30 minutes, thus implicating ubiquitylation as an early step in immune signaling.  
530 Surprisingly, several resistance proteins known to be ubiquitylation such as FLS2, BRI1, and  
531 BIK1 were not identified here (Lu et al., 2011; Ma et al., 2020; Zhou et al., 2018), which  
532 might be explained by the nature of the tissues examined or the extraction method used,  
533 which possibly preferred cytoplasmic versus plasma membrane/organelle-associated  
534 proteins. Furthermore, we should also emphasize the TUBE affinity approach likely binds  
535 polyubiquitylated proteins better than monoubiquitylated proteins and thus reduced the latter  
536 in our catalogs. One strategy to avoid this complication is to enrich for Ub footprints directly  
537 from trypsin-digested cell lysates using an anti- K- $\epsilon$ -GG antibodies specific for the GG-  
538 remnant on ubiquitylated lysines (Udeshi et al., 2013). In fact, recent studies with such  
539 antibodies in rice discovered 1,376 possible ubiquitylated proteins and revealed strong  
540 changes in ubiquitylation after a three-hr exposure to flg22 or fungal chitin (Chen et al.,  
541 2018). The only complications were that designation of a protein as an Ub target was often  
542 based on a single Ub footprint peptide and the reliability of the anti-K- $\epsilon$ -GG antibodies.  
543 Clearly, further advancements in enrichment strategies and MS instrumentation should  
544 further expand the specificity, stringency, and depth of ubiquitylome during diverse  
545 physiological conditions.

546 Within the flg22-induced ubiquitylomes identified here, we confirmed several Ub  
547 targets by *in vivo* ubiquitylation assays in protoplasts. Surprisingly, we found distinct  
548 ubiquitylation patterns and dynamic temporal responses to flg22 treatment. For example,  
549 MKK5 and MPK3 were strongly monoubiquitylated while SOBIR1 and EDS1 were mainly  
550 polyubiquitylated. Ubiquitylation of RPN8b and MPK3 was increased by flg22, with MPK3  
551 modification showing a transient effect. In contrast, ubiquitylation of EDS1 in the protoplasts  
552 was reduced in response to flg22 treatment. One of the more interesting substrates  
553 identified here was receptor protein kinase RKL1, which was polyubiquitylated, and found  
554 genetically to negatively regulate flg22-triggered ROS and immunity against bacterial *Pst*  
555 DC3000 infection. Intriguingly, RLK902, a close homolog of RKL1, was previously shown to  
556 positively regulate plant disease resistance (Zhao et al., 2019), suggesting that RKL1 and  
557 RLK902 counterbalance each other in immune signaling.

558 Ubiquitylation often intertwines with phosphorylation in regulating protein function (Hu  
559 and Sun, 2016; Reyes et al., 2011; Skubacz et al., 2016). A well-known example in plant  
560 disease resistance is BIK1, which is phosphorylated and subsequently monoubiquitylated  
561 upon flg22 perception (Ma et al., 2020). Here, we found that the phosphorylation (Asai et al.,



562 2002) target MPK3 is also ubiquitylated dynamically, and like phosphorylation, this  
563 modification was enhanced ~10 min after flg22 treatment, and then was reduced to basal  
564 levels after 30 min. The cognate E3 ligase for MPK3 is currently unknown; given that MPK3  
565 phosphorylates the E3 ligase PUB22 and regulates its turnover (Furlan et al., 2017), it is  
566 possible that PUB22 directs MPK3 ubiquitylation thus creating an internal regulatory loop.  
567 As MPK3 remained unchanged despite the dynamics of its ubiquitylation after flg22  
568 treatment, its ubiquitylation might not commit MPK3 to turnover but confer a reversible, non-  
569 proteolytic function. In line with some ubiquitylation events being reversible, we note the  
570 detection of several DUBs in our flg22-treated ubiquitylome datasets.

571 Pathway analysis of our ubiquitylome datasets upon MAMP perception revealed  
572 robust changes in the ubiquitylation status for numerous components involved in the UPS,  
573 including E1, E2, E3, and DUB family members. The *in vivo* ubiquitylation assays further  
574 confirmed that the E2 UBC13 in monoubiquitylated *in vivo* with the abundance of this  
575 modification increased upon flg22 treatment. While *ubc13* mutants morphologically  
576 resembled WT plants, they displayed an enhanced flg22-induced ROS burst and increased  
577 resistance against bacterial infection. Several E3s have also been implicated in immunity,  
578 including CPR1 (Cheng et al., 2011; Gou et al., 2012; Gou et al., 2009), PUB12/13 (Liao et  
579 al., 2017; Lu et al., 2011), PUB25/26 (Wang et al., 2018), PUB22/23/24 (Stegmann et al.,  
580 2012), and RHA3A/B (Ma et al., 2020). Although it is generally accepted that E3s, not E2s,  
581 are the key determinants in substrate selection, it is possible that UBC13 preferentially works  
582 with those E3s involved in immunity.

583 Proteasome components, including both the core and regulatory particles, are  
584 enriched in our ubiquitylome analysis, which is consistent with the observation in yeast  
585 (Peng et al., 2003), and the known role of ubiquitylation in directing proteasome turnover  
586 through autophagy (Marshall et al., 2015). Strikingly, several of the ubiquitylated subunits  
587 were only found in the flg22-treated ubiquitylome, implying an active regulation of the  
588 proteasome machinery upon flg22 perception. Previous studies showed that several  
589 regulatory particle subunits, such as RPN1a, RPN8a, and RPT2a, but not others, play a  
590 positive role in immunity (Yao et al., 2012). Unexpectedly, we found RPN8b negatively  
591 regulates the flg22-induced ROS burst and disease resistance against *Pst* DC3000 infection.  
592 As *Arabidopsis* also encodes a second isoform of RPN8 (RPN8a) that appears more  
593 dominant in providing this subunit (Book et al., 2010), one intriguing possibility is that the  
594 RPN8b isoform becomes assembled to a unique subset of proteasomes with functions more  
595 directed toward immune perception. The immunoproteasome assembled with unique  
596 isoforms of the CP subunits  $\beta$ 1,  $\beta$ 2, and  $\beta$ 5 could serve as an example of such non-  
597 redundancy (Finley, 2009). Clearly, further comparisons of mutants impacting both RPN8a

598 and RPN8b with respect to pathogen resistance, along with assays testing the ubiquitylation  
599 status of each is now necessary to explore this notion.

600

## 601 **Acknowledgements**

602 We thank the *Arabidopsis* Biological Resource Center (ABRC) for T-DNA insertion mutant  
603 seeds, and members of the laboratories of L.S., P.H. and R.D.V. for discussions and  
604 comments of the experiments. The work was supported by grants from the National  
605 Institutes of Health (NIH) (R01-GM092893) and National Science Foundation (NSF) (MCB-  
606 1906060) to P.H., NIH (R01-GM097247) and the Robert A. Welch Foundation (A-1795)  
607 grant to L.S., and a grant from the NIH (R01-GM124452) to R.D.V. C. Z. and Y.H. were  
608 partially supported by the China Scholarship Council (CSC).

609

## 610 **Author Contributions**

611 R.D.V., P.H., and L.S. conceived the project, designed experiments, and analyzed data.  
612 X.M., C.Z., D.K., and Y.H. performed experiments and analyzed data. X.M., C.Z., R.D.V.,  
613 and L.S. wrote the manuscript with inputs from all co-authors.

614

## 615 **Declaration of Interests**

616 The authors declare no competing interests.

617

## 618 **MATERIALS AND METHODS**

### 619 **Plant materials and growth conditions**

620 *Arabidopsis thaliana* 6*HIS-UBQ* transgenic plants in the Col-0 background were described  
621 previously (Saracco et al., 2009). The *rkl1-1* (SALK\_099094), *ubc13-1* (CS389049), *ubc13-2*  
622 (CS389056), *rpn8b-1* (SALK\_128568), *rpn8b-2* (SALK\_023568) T-DNA insertion lines were  
623 obtained from ABRC. *p35S::UBC13-HA* transgenic plants in the *ubc13-2* background and  
624 *p35S::RPN8b-HA* transgenic plants in the *rpn8b-1* background were generated in this study  
625 (see below for details). All *Arabidopsis* plants were grown in soil (Metro Mix 366, Sunshine  
626 LP5 or Sunshine LC1) in a growth chamber at 20-23 °C, 50% relative humidity and 75  $\mu\text{E m}^{-2}\text{s}^{-1}$   
627 light with a 12-hr light/12-hr dark photoperiod for four weeks before pathogen infection  
628 assay, protoplast isolation, and ROS assays.

629

### 630 **Plasmid construction and generation of transgenic plants**

631 *MPK3-HA*, *MKK5-MYC*, and *FLAG-UBQ* in a plant gene expression vector *pHBT* used for  
632 protoplast assays were described previously (Asai et al., 2002; Lu et al., 2011). *SOBIR1*,  
633 *RKL1*, *UBC13*, *RPN8b*, and *EDS1* tagged with HA in the *pHBT* vector were generated as

634 following: the gene was PCR amplified from total Col-0 cDNA with primers containing *Bam*HI  
635 (for *SOBIR1*, *RKL1*, *UBC13*, and *RPN8b*) or *Nco*I (for *EDS1*) at the 5' end and *Stu*I at the 3'  
636 end, followed by *Bam*HI/*Nco*I and *Stu*I digestion and ligation into the *pHBT* vector with a  
637 sequence encoding a HA tag at the 3' end. DNA fragments cloned into the *pHBT* vectors  
638 were confirmed as correct by Sanger sequencing. The *UBC13-HA* and *RPN8b-HA*  
639 transgenes were further shuttled into a *pCB302* vector by insertion into *Bam*HI and *Stu*I  
640 digestion sites. The *A. tumefaciens*-mediated floral dip was used to transform the above  
641 binary vectors into *ubc13-2* or *rpn8b-1* plants. Transgenic plants were selected by  
642 glufosinate-ammonium (Basta, 50 µg/ml) resistance. Multiple transgenic lines were  
643 analyzed by immunoblotting for protein expression. Two lines with a 3:1 segregation ratio  
644 for Basta resistance in the T3 generation were selected to obtain homozygous seeds for  
645 further studies.

646

#### 647 **Affinity purification of ubiquitylated proteins**

648 Affinity purification of ubiquitylated proteins was described (Kim et al., 2013) with  
649 modifications. Seeds of *Arabidopsis* Col-0 and *6HIS-UBQ* transgenic plants were vernalized  
650 at 4 °C for three days and surface-sterilized with 75% ethanol for 10 min and 5% bleach for  
651 10 min, and plated in 1/2-strength Murashige and Skoop (MS) medium containing 1%  
652 sucrose and 0.5% agar (100 seedlings per plate) at 23 °C, 75 µE m<sup>-2</sup>s<sup>-1</sup> light with a 12-hr  
653 light/12-hr dark photoperiod for 14 days. Approximately 5000 seedlings (50 plates) were  
654 used for each biological replicate which generated ~16-21 gram fresh weight of tissue.  
655 Seedlings were gently transferred into a Petri dish plate and incubated overnight in water.  
656 After removing the water by vacuum, seedlings were treated for 30 min with 100 nM flg22 or  
657 water as a control.

658 Seedlings were gently blot-dried on Kimwipes, frozen to liquid nitrogen temperatures,  
659 and homogenized in 0.5 g/mL of extraction buffer (EB; 50 mM Tris-HCl, pH 7.2, and 200 mM  
660 NaCl), containing 0.25% Triton X-100, 13 protease inhibitor cocktail (Roche, 1 tablet per 10  
661 ml of EB), 2 mM phenylmethanesulfonyl fluoride, 10 mM 2-chloroacetamide, 10 mM sodium  
662 metasilfite, and 1 mM N-ethylmaleimide (freshly added). The homogenate was filtered  
663 through two layers of Miracloth and the supernatant was mixed with TUBEs beads as the  
664 ratio of 40 g of tissue to 1 mL of beads. After incubated for 6 hr at 4°C, the beads were  
665 collected in a 2 x 1-0cm chromatography column and washed three times with EB and three  
666 times with EB plus 1, 2, 4 M NaCl, and eluted in 10 mL of 7 M guanidine-HCl, 100 mM  
667 NaH<sub>2</sub>PO<sub>4</sub>, and 10 mM Tris-HCl (pH 8.0, 24 °C). The eluted conjugates were incubated with  
668 500 µl of Ni-NTA beads for 12 hr at 4°C in the same buffer with the addition of 20 mM  
669 imidazole and 10 mM 2-chloroacetamide. The beads were collected and washed once in 6

670 M guanidine-HCl, 0.1% SDS, 100 mM NaH<sub>2</sub>PO<sub>4</sub>, and 10 mM Tris-HCl (pH 8.0), and once in  
671 urea buffer (UB; 8 M urea, 100 mM NaH<sub>2</sub>PO<sub>4</sub>, and 10 mM Tris-HCl (pH 8.0)) also containing  
672 0.1% Triton X-100, twice in UB plus 20 mM imidazole, and three times in UB alone, and  
673 eluted by 1 ml of UB supplemented with 400 mM imidazole. The two-step purified  
674 conjugates were filtered by the Ultracel-10K filter (Millipore) and separated by SDS-PAGE  
675 followed by staining for protein with silver, or immunoblotting with anti-Ub (Sigma-Aldrich) or  
676 anti-His (Novagen) antibodies to detect Ub conjugates.

677

### 678 **Mass spectrometry**

679 Purified proteins (100 µl) or control samples were reduced with 10 mM DTT at room  
680 temperature for 1 hr, and alkylated in the dark in the presence of 30 mM 2-chloroacetamide  
681 at room temperature for a further 1 hr. Excess alkylating agent was quenched with 20 µL of  
682 200 mM DTT for 10 min. Samples, ten-fold diluted with 25 mM ammonium bicarbonate,  
683 were digested for 12 hr at 37 °C with 2 mg of sequencing-grade trypsin (Promega), followed  
684 by a second incubation for 6 hr with an additional 2 mg of trypsin. Digestion products were  
685 desalted using a C18 solid-phase extraction pipette tip (SPEC PT C18, Varian), vacuum  
686 dried, and reconstituted in 10 µL of 0.1% formic acid and 5% acetonitrile in water for MS  
687 analysis.

688 Samples were analyzed by a nanoflow liquid chromatography system (nanoAcquity;  
689 Waters) combined with an electrospray ionization FT/ion-trap mass spectrophotometer (LTQ  
690 Orbitrap Velos; Thermo Fisher Scientific). The LC system employed a 100 × 365 -µm fused  
691 silica microcapillary column packed with 15 cm of 3-µm-diameter, 100-Å pore size, C18  
692 beads (Magic C18; Bruker), with the emitter tip pulled to 2 mm using a laser puller (Sutter  
693 Instruments). Peptides were loaded onto the column for 30 min at a flow rate of 500 nL/min  
694 and eluted over 120 min at a 200 nL/min flow rate with a gradient of 2% to 30% acetonitrile  
695 in 0.1% formic acid. MS spectra were acquired in the FT orbitrap between 300 and 1500  
696 mass-to-charge ratios (m/z) at a resolution of 60 000, followed by 10 MS/MS HCD scans of  
697 the 10 highest intensity parent ions at 42% relative collision energy and 7500 resolution, with  
698 a mass range starting at 100 mass-to-charge ratios. Dynamic exclusion was enabled with a  
699 repeat value of two for 30 sec and an exclusion window for 120 sec.

700

### 701 **MS data analysis**

702 The MS/MS data were searched using SEQUEST version 1.2 (ThermoFisher Scientific)  
703 against the *A. thaliana* ecotype Col-0 protein database (IPI database, version 3.85,  
704 containing 39,677 entries available within the *Arabidopsis* Information Resource [TAIR],  
705 <http://www.arabidopsis.org>) databse. Masses for both precursor and fragment ions were

706 treated as monoisotopic. Met oxidation (+15.994915 Da), Cys carbamidomethylation  
707 (+57.021464 Da), the di-Gly Ub footprint indicating Ub addition to a lysine residue (+114.043  
708 Da) were set as variable modifications. The database search allowed for up to two missed  
709 trypsin cleavages, and the ion mass tolerances were set to 10 ppm for precursor and 0.1 Da  
710 for HCD fragments. The data were filtered using a 1% FDR, and a minimum of two peptide  
711 matches was required or at least one peptide if it included a GGK Ub footprint.

712 GO analysis was evaluated by DAVID Functional Annotation Tool (Huang da et al.,  
713 2009) using GO annotations in the TAIR GO database (<http://www.arabidopsis.org/>). Fold  
714 enrichments were calculated based on the frequency of proteins annotated to the term  
715 compared with their frequency in the proteome. The  $p$ -value combined with the FDR  
716 correction was used as criteria of significant enrichment for GO catalogs, whereas a  $p$ -value  
717  $< 0.05$  were considered to be enriched for GO terms. The GO annotation was classified  
718 based on the “biological processes,” “molecular functions,” and “cellular components”  
719 categories and visualized as a bubble plot by R Project 4.0.0 (<https://www.r-project.org/>)  
720 (Bonnot et al., 2019). Protein interaction networks were created by the STRING database  
721 version 11.0 (Szklarczyk et al., 2015), and visualized by Cytoscape version 3.8.0 (Shannon  
722 et al., 2003).

723

#### 724 **Detection of ROS production**

725 Leaves from 4-5-week-old, soil-grown *Arabidopsis* plants were punched into 5-mm diameter  
726 discs. The discs were incubated in 100  $\mu$ l of water with gentle shaking overnight, which was  
727 then replaced with 100  $\mu$ l of reaction solution containing 50  $\mu$ M luminol and 10  $\mu$ g/ml  
728 horseradish peroxidase (Sigma-Aldrich) supplemented with or without 100 nM flg22.  
729 Luminescence was measured with a luminometer (GloMax®-Multi Detection System,  
730 Promega) with a setting of 1 min as the interval for 40 min. Detected values for ROS  
731 production were indicated as means of Relative Light Units (RLU).

732

#### 733 **Pathogen infection assays**

734 *Pseudomonas syringae* pv. *tomato* (*Pst*) DC3000 was cultured for overnight at 28 °C in  
735 King's B medium supplemented with rifamycin (50  $\mu$ g/ml). Cells were collected by  
736 centrifugation at 3,500 rpm, washed, and re-suspended to the density of  $5 \times 10^5$  cfu/ml in 10  
737 mM MgCl<sub>2</sub>. Leaves from four-week-old *Arabidopsis* plants were hand-inoculated with  
738 bacterial suspension using a needleless syringe. To measure *in planta* bacterial growth,  
739 three to four samples, each containing two 6-mm diameter leaf discs, were homogenized in  
740 100  $\mu$ l of water, and plated in serial dilutions on medium containing 1% tryptone, 1%

741 sucrose, 0.1% glutamic acid, 1.8% agar, and 25 µg/ml rifamycin. Plates were incubated at  
742 28 °C and bacterial colony forming units (cfu) were counted after 2 days.

743

#### 744 ***In vivo* ubiquitylation assays**

745 Protoplast isolation and transient expression assay were as described previously (Zhou et  
746 al., 2014). Protoplasts were freshly isolated from leaves of four-week-old Col-0 plants and  
747 transfected at  $2 \times 10^5$  cell/ml (500 µL) with various combinations of plasmids harboring  
748 genes encoding FLAG-UBQ (25 µL at 2 µg DNA/µL), and the HA or MYC-tagged proteins of  
749 interested (25 µL at 2 µg DNA /µL). The protoplasts were incubated for overnight at room  
750 temperature followed by a 2-hr treatment with DMSO alone or 2 µM MG132 dissolved in  
751 DMSO, and then a 2-hr exposure to 100 nM flg22. After homogenization in 300 µL of  
752 Immunoprecipitation (IP) buffer (150 mM NaCl, 50 mM Tris-HCl (pH 7.5), 5 mM Na<sub>2</sub>EDTA,  
753 1% Triton X-100, 2 mM Na<sub>3</sub>VO<sub>4</sub>, 2 mM NaF, 1 mM DTT, and 1:100 diluted protease inhibitor  
754 cocktail (Sigma-Aldrich), the FLAG-tagged proteins were immunoprecipitated by incubation  
755 of the extracts with 5 µL of anti-FLAG antibody agarose beads (Sigma-Aldrich) for 1 hr at 4  
756 °C with gentle shaking. The anti-FLAG antibody beads were collected and washed three  
757 times with IP buffer (without cocktail) and once with 50 mM Tris-HCl (pH 7.5), and then  
758 incubated in 30 µL of hot SDS-PAGE sample buffer for 5 min. Twenty µL of the sample  
759 before adding the beads was used as the input control. The samples were separated by  
760 SDS-PAGE followed by electrophoretic transfer onto Immun-Blotpolyvinylidene difluoride  
761 (PVDF) membranes (Bio-Rad), and immunoblotting with appropriate antibodies. Antibodies  
762 against plant Ub (van Nocker et al., 1996) and 6His (Kim et al., 2013) were as described.  
763 Anti-FLAG, anti HA, and, anti-myc antibodies were purchased from Sigma-Aldrich (A8592),  
764 Roche (12013819001), and Santa Cruz (sc-40), respectively.

765

#### 766 **Statistical analyses**

767 Data for quantification analyses are presented as mean ± standard error of the mean  
768 (s.e.m.). The statistical analyses were performed by Student's *t*-test or one-way analysis of  
769 variance (ANOVA) test (\* *p*-value < 0.05, \*\* *p*-value < 0.01, \*\*\* *p*-value < 0.001). The  
770 number of replicates is shown in the figure legends.

771

772

773 **FIGURE LEGENDS**

774

775 **Figure 1. Two-step affinity purification of ubiquitylated proteins from transgenic**  
776 ***Arabidopsis* expressing 6HIS-UBQ treated with or without flg22.**

777 **A.** Diagram of the *p35S:hexa-6HIS-UBQ* transgene. A synthetic UBQ gene encoding six  
778 repeats of a Ub monomer N-terminally tagged with a 6His sequence followed by a glycine  
779 (G)-rich linker (MHHHHHHGGGGGSA) was fused head-to-tail to form a single in-frame  
780 *hexa-6His-UBQ* transgene expressed under the control of the constitutive CaMV 35S  
781 promoter (Saracco et al., 2009).

782 **B.** Flow chart describing the proteomic approach to stringently identify Ub conjugates from  
783 *Arabidopsis p35S::hexa-6HIS-UBQ* seedlings. Ubiquitylated proteins were first enriched by  
784 the UBA-Ub affinity using GST-TUBEs beads under the native condition followed by Ni-NTA  
785 chromatography under the denaturing condition. The eluants were digested with trypsin and  
786 subjected to LC/ESI-MS/MS analysis.

787 **C and D.** Ubiquitylated proteins isolated from *Arabidopsis* plants expressing 6His-Ub by the  
788 two-step affinity purification. Ubiquitylated proteins enriched as outlined in (B) were  
789 subjected to SDS-PAGE and by either stained for protein with silver (C) or immunoblotted  
790 with anti-Ub antibodies (D). Samples from wild-type seedlings (WT) purified with both GST-  
791 TUBEs and Ni-NTA beads were included for comparison. FT and EL represent the flow-  
792 through and eluted fractions, respectively, from the Ub affinity (1) and Ni-NTA affinity  
793 columns (2). The total represents the total protein extracts before affinity purifications. The  
794 migration positions of the Ub dimers (Ub<sub>2</sub>), and Ub conjugates (Ub-conj) are indicated by the  
795 brackets.

796

797 **Figure 2. Gene ontology (GO) analysis of flg22-treated and untreated ubiquitylomes.**

798 **A.** Venn diagram showing the overlap of the total ubiquitylated proteins isolated from plants  
799 with or without flg22 exposure.

800 **B.** Gene ontology (GO) enrichment of ubiquitylated proteins in control or flg22 treated  
801 ubiquitylomes. GO analysis in biological processes, molecular functions, and cellular  
802 components was performed using the DAVID Functional Annotation Tool (Huang da et al.,  
803 2009) and GO annotations from the TAIR GO database (<http://www.arabidopsis.org/>). The  
804 fold enrichment was calculated based on the frequency of proteins annotated to the term  
805 compared with their frequency in the total proteome. The dot size indicates the number of  
806 genes associated with each process and the dot color indicates the significance of the  
807 enrichment. FDR was based on the corrected *p*-values. The vertical grey dashed line  
808 represents a fold enrichment of 1. The total number of GO terms was listed under each GO

809 domain (biological processes, molecular functions, and cellular components). The selected  
810 terms related to stress and the UPS are shown.

811 **C.** Venn diagram showing the overlaps of ubiquitylated proteins with or without flg22 in the  
812 selected categories. Proteins were categorized into functional groups based on the GO  
813 annotations; those related to defense responses and the UPs are shown.

814

815 **Figure 3. Protein interaction network of ubiquitylated proteins identified from 6HIS-**  
816 **UBQ seedlings treated with or without flg22.**

817 **A.** Protein interaction networks were generated with the list of 391 (control) and 570 (flg22-  
818 treated) ubiquitylated proteins using the STRING database and visualized in Cytoscape.  
819 The node colors indicate proteins identified in control (yellow), flg22-treated (red), or both  
820 conditions (blue) of datasets. Clusters of the proteasome, ubiquitylation, and defense-  
821 related components are marked by dashed lines.

822 **B.** Map of proposed subcellular locations and functions of immunity-related proteins  
823 identified from the ubiquitylomes.

824

825 **Figure 4. *In vivo* confirmation that several candidates are ubiquitylated in**  
826 ***Arabidopsis*.**

827 *Arabidopsis* wild-type protoplasts were co-transfected with FLAG-tagged Ub (*FLAG-UBQ*)  
828 and HA- or myc-tagged substrate or a control vector (Ctrl) and incubated for 10 hr followed  
829 by treatment with 100 nM flg22 for the indicated. Protein extracts were immunoprecipitated  
830 with anti-FLAG agarose beads (IP:  $\alpha$ -FLAG) and the ubiquitylated proteins were  
831 immunoblotted with anti-HA or anti-myc antibodies (top left) or anti-FLAG antibodies (bottom  
832 left). The input controls were shown by an anti-HA/myc (top right) or anti-FLAG (bottom  
833 right) immunoblots. **A.** Monoubiquitylation of MPK3 is enhanced upon flg22 treatment.  
834 Protoplasts were isolated at 0 to 30 min after flg22 exposure.

835 **B.** Polyubiquitylation of SOBIR1 *in vivo* is enhanced upon a 30 min treatment with flg22.

836 **C, D.** MKK5, and EDS1 were ubiquitylated *in vivo* following a 30-min treatment with flg22.

837 The above experiments were performed three times with similar results.

838

839 **Figure 5. RKL1 is ubiquitylated and involved in PTI responses.**

840 **A.** Diagram of the RKL1 protein. The signal peptide (SP), leucine-rich repeat (LRR),  
841 transmembrane (TM), and protein kinase (K) domains are shown. The amino acids  
842 demarcating each domain are shown.

843 **B.** *In vivo* ubiquitylation of RKL1 upon flg22 treatment. Protoplasts were co-transfected with  
844 *FLAG-UBQ* and HA-tagged RLK1 (*RKL1-HA*) or a control vector (Ctrl) and incubated for 10



845 hr followed by treatment with 100 nM flg22 for 30 min. Proteins were immunoprecipitated  
846 with anti-FLAG agarose beads (IP:  $\alpha$ -FLAG) and the ubiquitylated proteins were detected by  
847 immunoblotting with anti-HA antibodies (top). The input controls were shown by an anti-HA  
848 immunoblot (bottom).

849 **C.** flg22-induced reactive oxygen species (ROS) burst is elevated in the *rkl1-1* mutants. Leaf  
850 disks of four-week-old soil-grown *Arabidopsis* WT or *rkl1-1* plants (*SALK 099094*) were  
851 treated with 100 nM flg22 or water as a control, and ROS production was monitored over  
852 time. The data are shown as mean  $\pm$  s.e.m (n = 16) of relative fluorescence units (RLU)  
853 overlaid on the dot plot.

854 **D.** *rkl1* mutants have elevated resistance against *Pst* DC3000. Leaf disks of four-week-old  
855 soil-grown *Arabidopsis* WT or *rkl1-1* plants were hand-infiltrated with *Pst* DC3000 at  
856  $OD_{600}=5 \times 10^{-4}$  CFU/ml, and bacterial growth was counted at 0 or 3 dpi. The data are shown  
857 as mean  $\pm$  s.e.m. overlaid on dot plot (n = 3 for 0 dpi; n = 4 for 3 dpi). The experiments were  
858 performed three times with similar results.

859

#### 860 **Figure 6. UBC13 is ubiquitylated and negatively regulates PTI responses.**

861 **A.** *In vivo* ubiquitylation of UBC13 upon flg22 treatment. Protoplasts were co-transfected  
862 with *FLAG-UBQ* and HA-tagged UBC13 (*UBC13-HA*) and incubated for 10 hr followed by  
863 treatment with 100 nM flg22 for 30 min. Protein extracts were immunoprecipitated with anti-  
864 FLAG beads (IP:  $\alpha$ -FLAG) and the ubiquitylated proteins were immunoblotted with anti-HA  
865 antibodies (top). The input control was shown by an anti-HA immunoblot (bottom).

866 **B, C.** UBC13 negatively regulates flg22-triggered ROS production. Leaf disks of four-week-  
867 old WT, *ubc13* (*CS389049/ubc13-1* & *CS389056/ubc13-2*), and plants harboring the  
868 *p35S::UBC13-HA* transgene in the *ubc13-2* mutant background were treated with 100 nM  
869 flg22. ROS production was monitored over time. The data are shown as mean  $\pm$  s.e.m  
870 overlaid on dot plot (n =16) of RLU. The total photon count was shown in **(C)**.

871 **D.** *ubc13* mutants have elevated resistance against *Pst* DC3000. Leaf disks of four-week-  
872 old soil-grown WT, *ubc13-1*, *ubc13-2*, and *p35S::UBC13-HA ubc13-2* (Line 1 and 2) plants  
873 were hand-infiltrated with *Pst* DC3000 at  $OD_{600}=5 \times 10^{-4}$  CFU/ml, and bacterial growth was  
874 counted at 3 dpi. The data are shown as mean  $\pm$  s.e.m overlaid on the dot plot (n = 3). The  
875 experiments were performed three times with similar results.

876

#### 877 **Figure 7. RPN8b is ubiquitylated and negatively regulates PTI responses.**

878 **A.** *in vivo* ubiquitylation of RPN8b upon flg22 treatment. Protoplasts were co-transfected  
879 with *FLAG-UBQ* and HA-tagged RPN8b (*RPN8b-HA*) or a control vector (Ctrl) and incubated  
880 for 10 hr followed by treatment with 100 nM flg22 for 30 min. Protein extracts from

881 protoplasts were immunoprecipitated with anti-FLAG beads (IP:  $\alpha$ -FLAG) and the  
882 ubiquitylated proteins were immunoblotted with anti-HA antibodies (top). The input control  
883 was shown by an anti-HA immunoblot (bottom).

884 **B, C.** RPN8b negatively regulates flg22-triggered ROS production. Leaf disks of four-week-  
885 old WT, *rpn8b-1* (SALK\_128568), *rpn8b-2* (SALK\_023568), and *rpn8b-1* plants harboring the  
886 *p35S::RPN8b-HA* transgene were treated with 100 nM flg22 or water as a control, and ROS  
887 production was monitored over time. The data are shown as mean  $\pm$  s.e.m overlaid on the  
888 dot plot ( $n \geq 13$ ) of RLU. The total photon count was shown in (C).

889 **D.** *rpn8b* mutants have elevated resistance against *Pst* DC3000. Leaf disks from four-week-  
890 old soil-grown WT, *rpn8b-1*, *rpn8b-2*, and *35S::RPN8b rpn8b-1* plants were hand-infiltrated  
891 with *Pst* DC3000 at  $OD_{600}=5 \times 10^{-4}$  CFU/ml, and bacterial growth was counted at 3 dpi. The  
892 data are shown as mean  $\pm$  s.e.m overlaid on dot plot ( $n = 3$ ). The experiments were  
893 performed three times with similar results.

894

#### 895 **Figure 8. MS/MS mapping of Ub-Ub linkages.**

896 **A.** Strategy for detecting ubiquitylation sites by MS/MS. After trypsin digestion, a diglycine  
897 remnant of Ub covalently appended to a lysine residue of a conjugated protein is detected by  
898 an increased mass of 114 kDa for the lysine residue, along with protection from trypsin  
899 cleavage after that residue. Amino acids are denoted by single-letter code.

900 **B.** The distribution of Ub-Ub linkages across the seven Ub lysines based on MS analysis  
901 from *Arabidopsis* transgenic plants carrying *6HIS-UBQ* seedlings treated with or without 100  
902 nM flg22. Percentage of Ub footprints at each site were obtained from PSM counts of  
903 diagnostic footprint peptides.

904

905 **Table 1.** Ubiquitylation of immunity-related proteins identified from *6HIS-*  
 906 *UBQ* seedlings treated with or without flg22.

907

| Locus ID  | Other names   | Description                                | Category          | Role in immunity                                                                                                                        | Condition | Ref.                                             |
|-----------|---------------|--------------------------------------------|-------------------|-----------------------------------------------------------------------------------------------------------------------------------------|-----------|--------------------------------------------------|
| AT4G34230 | CAD5          | Cinnamyl alcohol dehydrogenase 5           | Preformed defense | Involves in lignin biosynthesis and disease resistance against <i>Pst</i> DC3000.                                                       | flg22     | (Tronchet et al., 2010)                          |
| AT3G10340 | PAL4          | Phenylalanine ammonia-lyase 4              | Preformed defense | Functions in the lignin and SA pathway in plant disease resistance.                                                                     | flg22     | (Chen et al., 2017; Huang et al., 2010)          |
| AT5G36890 | BGLU42        | Beta glucosidase 42                        | Preformed defense | Promotes disease resistance against <i>B.cinerea</i> , <i>H.arabidopsidis</i> and <i>Pst</i> DC3000                                     | flg22     | (Stringlis et al., 2018; Zamioudis et al., 2014) |
| AT3G53420 | PIP2A, PIP2;1 | Plasma membrane intrinsic protein 2A       | Preformed defense | Involves in stomatal closure triggered by abscisic acid (ABA) or flg22 for water and H <sub>2</sub> O <sub>2</sub> transport activities | flg22     | (Rodrigues et al., 2017)                         |
| AT1G09970 | RLK7          | Leucine-rich repeat receptor-like kinase 7 | RLK               | Receptor for PIP1 defense peptide in PTI signaling                                                                                      | flg22     | (Hou et al., 2014; Pitorre et al., 2010)         |
| AT3G14840 | LIK1          | LysM RLK1-interacting kinase 1             | RLK               | Interacts with CERK1 and positively regulates resistance to necrotrophic pathogens.                                                     | flg22     | (Le et al., 2014)                                |
| AT1G48480 | RKL1          | Receptor-like protein kinase 1             | RLK               | Characterized in this study                                                                                                             | flg22     | (Tarutani et al., 2004)                          |
| AT2G31880 | SOBIR1,       | Leucine-rich repeat                        | RLK               | Interacts with multiple                                                                                                                 | flg22     | (Albert et                                       |

|           |            |                                                                               |           |                                                                                                                                        |       |                                                                                               |
|-----------|------------|-------------------------------------------------------------------------------|-----------|----------------------------------------------------------------------------------------------------------------------------------------|-------|-----------------------------------------------------------------------------------------------|
|           | EVR        | receptor-like protein                                                         |           | LRR-RLP and functions as a common component in RLP-mediated plant immunity                                                             |       | al., 2015; Liebrand et al., 2014)                                                             |
| AT1G53350 | RPP8L2     | RPP8 like protein 2; Resistance protein; CC-NBS-LRR                           | CNL       | Belongs to CNL-D subclass, may involve in controlling virus infection                                                                  | flg22 | (Bakker et al., 2006; Mondragon-Palomino et al., 2017; Revers et al., 2003; Tan et al., 2007) |
| AT5G45240 |            | Resistance protein; TIR-NBS-LRR                                               | TNL       | uncharacterized                                                                                                                        | flg22 |                                                                                               |
| AT5G48770 |            | Resistance protein; TIR-NBS-LRR                                               | TNL       | uncharacterized                                                                                                                        | flg22 |                                                                                               |
| AT5G13530 | KEG        | RING E3 Ub-protein ligase; KEEP ON GOING                                      | Signaling | Essential for the secretion of apoplast antimicrobial proteins.                                                                        | flg22 | (Gu and Innes, 2011)                                                                          |
| AT2G46240 | BAG6       | BCL-2-associated athanogene 6                                                 | Signaling | Co-chaperone regulating diverse cellular pathways, such as programmed cell death, abiotic stress responses, and plant basal resistance | flg22 | (Li et al., 2016)                                                                             |
| AT2G21660 | CCR2, GRP7 | Cold, circadian rhythm, and RNA binding 2; glycine-rich RNA binding protein 7 | Signaling | Associates with FLS2 mRNA and proteins; maintains the FLS2 protein level                                                               | flg22 | (Nicaise et al., 2013)                                                                        |

|           |                  |                                                          |           |                                                                                                              |                   |                                                               |
|-----------|------------------|----------------------------------------------------------|-----------|--------------------------------------------------------------------------------------------------------------|-------------------|---------------------------------------------------------------|
| AT4G34460 | AGB1,<br>ELK4    | Heterotrimeric G-protein beta subunit; ERECTA-LIKE 4     | Signaling | Complexes with FLS2 and regulates BIK1 stability                                                             | flg22             | (Liang et al., 2016; Liu et al., 2013)                        |
| AT5G03520 | RAB8C,<br>RABE1D | Rab GTPase homolog 8C                                    | Signaling | Involves in protein trafficking, interacts with AvrPto, and accumulates in response to bacterial infection   | flg22             | (Hou and Gao, 2017; Speth et al., 2009a)                      |
| AT3G21220 | MEK5,<br>MKK5    | Mitogen-activated protein kinase kinase 5                | Signaling | Activate MPK3 and MPK6 in PTI signaling.                                                                     | flg22             | (Meng and Zhang, 2013)                                        |
| AT3G45640 | MPK3             | Mitogen-activated protein kinase 3                       | Signaling | Activated by MAMP treatment in PTI signaling                                                                 | flg22             | (Asai et al., 2002; Pecher et al., 2014; Su et al., 2018)     |
| AT2G33340 | MAC3B;<br>PUB60  | MOS4-associated complex 3B; Plant U-Box 60 E3 ligase     | Signaling | Localizes to the nucleus and involves in plant innate immunity.                                              | flg22             | (Monaghan et al., 2009)                                       |
| AT1G77740 | PIP5K2           | Phosphatidylinositol-4-phosphate 5-kinase                | Signaling | Responsible for PI(4,5)P2 biosynthesis; inhibits fungal pathogen development and triggers disease resistance | Control           | (Qin et al., 2020)                                            |
| AT3G18130 | RACK1C           | Receptor for activated C kinase 1C                       | Signaling | scaffold proteins connecting heterotrimeric G proteins with a MAPK cascade in plant immunity                 | Control,<br>flg22 | (Cheng et al., 2015; Nakashima et al., 2008; Su et al., 2015) |
| AT3G48090 | EDS1             | Enhanced disease susceptibility 1; a lipase-like protein | Signaling | Required for multiple TNL-mediated resistance.                                                               | flg22             | (Cui et al., 2015; Heidrich et                                |

|           |              |                                    |                   |                                                                                                         |                |                                                    |
|-----------|--------------|------------------------------------|-------------------|---------------------------------------------------------------------------------------------------------|----------------|----------------------------------------------------|
|           |              |                                    |                   |                                                                                                         |                | al., 2011; Parker et al., 1996)                    |
| AT3G50480 | HR4          | Homolog of RPW8                    | Signaling         | Involved in autoimmunity mediated by RPP7 oligomerization                                               | flg22          | (Li et al., 2020)                                  |
| AT1G64790 | ILA          | ILITYHIA; HEAT repeat protein      | SAR               | Involved in immunity against bacterial infection, non-host resistance, and systemic acquired resistance | flg22          | (Monaghan and Li, 2010)                            |
| AT2G44490 | BGLU26, PEN2 | Beta glucosidase 26, PENETRATION 2 | Preformed defense | Required for callose deposition and glucosinolate activation in pathogen-induced resistance             | Control, flg22 | (Clay et al., 2009; Pastorczyk and Bednarek, 2016) |
| AT3G19450 | CAD4         | Cinnamyl alcohol dehydrogenase 4   | Preformed defense | Involved in lignin biosynthesis and disease resistance to bacterial pathogens.                          | Control, flg22 | (Kim et al., 2004; Tronchet et al., 2010)          |
| AT4G03550 | GSL5, PMR4   | Callose synthase                   | Preformed defense | Required for callose formation induced by pathogen infections.                                          | Control, flg22 | (Jacobs et al., 2003; Wawrzynska et al., 2010)     |
| AT1G63350 |              | Resistance protein; CC-NBS-LRR     | CNL               | uncharacterized                                                                                         | Control, flg22 |                                                    |
| AT1G01560 | MPK11        | MAP Kinase 11                      | Signaling         | Activated upon flg22 treatment                                                                          | Control, flg22 | (Bethke et al., 2012; Eschen-Lippold et al., 2012) |

|           |        |                                    |           |                                                                                              |                |                                                               |
|-----------|--------|------------------------------------|-----------|----------------------------------------------------------------------------------------------|----------------|---------------------------------------------------------------|
| AT4G23650 | CPK3   | Calcium-dependent protein kinase 3 | Signaling | required for sphingolipid-induced cell death and viral infection                             | Control, flg22 | (Lachaud et al., 2013; Perraki et al., 2017)                  |
| AT1G48630 | RACK1B | Receptor for activated C kinase 1B | Signaling | scaffold proteins connecting heterotrimeric G proteins with a MAPK cascade in plant immunity | Control, flg22 | (Cheng et al., 2015; Nakashima et al., 2008; Su et al., 2015) |

908

909

**Table 2.** Examples of UBQ pathway components identified from ubiquitylomes

| Locus ID  | Other names   | Description                                         | Category  | Role in immunity                                                                                        | Condition | Ref.                                                            |
|-----------|---------------|-----------------------------------------------------|-----------|---------------------------------------------------------------------------------------------------------|-----------|-----------------------------------------------------------------|
| AT2G47110 | UBQ6          | Poly-UBQ gene                                       | Ubiquitin | Not known.                                                                                              | flg22     |                                                                 |
| AT2G30110 | UBA1          | Ub-activating enzyme 1                              | E1        | Involved in PTI and ETI.                                                                                | flg22     | (Furniss et al., 2018b; Goritschnig et al., 2007)               |
| AT1G78870 | UBC13A, UBC35 | Ub-conjugating enzyme 35/13A                        | E2        | Regulates the immune response mediated by Fen and other R proteins through Lys-63-linked ubiquitylation | flg22     | (Mural et al., 2013; Wang et al., 2019)                         |
| AT3G46460 | UBC13         | Ub-conjugating enzyme 13                            |           | Characterized in this study.                                                                            | flg22     |                                                                 |
| AT4G02570 | AXR6, CUL1    | Cullin-1, a component of SCF Ub E3 ligase complexes |           | SKP1-CULLIN1-CPR1 (SCF), regulates protein stability of SNC1 and RPS2 and autoimmunity                  | flg22     | (Cheng et al., 2011)                                            |
| AT5G46210 | CUL4          | CULLIN4, Ub E3 ligase                               |           | Required for <i>PR</i> gene expression and resistance to Agrobacterial infection.                       | flg22     | (Liu et al., 2012a)                                             |
| AT4G12570 | UPL5          | Ub E3 ligase UPL5                                   | E3        | Required for SA- and NPR1-mediated plant immunity                                                       | flg22     | (Furniss et al., 2018a; Miao and Zentgraf, 2010; Zhou and Zeng, |



|           |               |                                               |                      |                                                                                                                                    |                   |                                                                                                                     |
|-----------|---------------|-----------------------------------------------|----------------------|------------------------------------------------------------------------------------------------------------------------------------|-------------------|---------------------------------------------------------------------------------------------------------------------|
|           |               |                                               |                      |                                                                                                                                    |                   | 2017)                                                                                                               |
| AT1G70320 | UPL2          | Ub E3 ligase 2                                |                      | Not known.                                                                                                                         | Control,<br>flg22 |                                                                                                                     |
| AT4G30890 | UBP24         | Ub-specific protease 24                       | UBP                  | Negatively regulates abscisic acid signaling; a potential MPK3 interactor.                                                         | flg22             | (Rayapuram et al., 2018; Zhao et al., 2016)                                                                         |
| AT3G11910 | UBP13         | Ub-specific protease 13                       |                      | Negatively regulates plant resistance against <i>Pst</i> DC3000 infections                                                         | flg22             | (Ewan et al., 2011)                                                                                                 |
| AT5G06600 | UBP12         | Ub-specific protease 12                       |                      |                                                                                                                                    | Control,<br>flg22 |                                                                                                                     |
| AT4G24320 |               | Ub carboxyl-terminal hydrolase family protein | UCH                  | Not known.                                                                                                                         | flg22             |                                                                                                                     |
| AT3G61140 | CSN1,<br>FUS6 | COP9 signalosome subunit 1                    | COP9                 | Not known.                                                                                                                         | flg22             |                                                                                                                     |
| AT5G56280 | CSN6A         | COP9 signalosome complex subunit 6a           |                      | Not known.                                                                                                                         | flg22             |                                                                                                                     |
| AT3G22110 | PAC1          | 26S proteasome subunit alpha type-4           | Proteasome component | Both the 26S proteasome core and regulatory particles were implicated to be involved in plant defense against pathogen infections. | flg22             | (Adams and Spoel, 2018; DIELEN et al., 2010; Lee et al., 2006; Marino et al., 2012; Üstün et al., 2016; Yao et al., |
| AT3G27430 | PBB1          | 26S proteasome subunit beta type-7A           |                      |                                                                                                                                    | flg22             |                                                                                                                     |
| AT3G26340 | PBE2          | 26S proteasome subunit beta type-5B           |                      |                                                                                                                                    | flg22             |                                                                                                                     |

|           |       |                                                          |  |  |                   |       |
|-----------|-------|----------------------------------------------------------|--|--|-------------------|-------|
| AT5G58290 | RPT3  | 26S<br>proteasome<br>regulatory<br>AAA-ATPase<br>subunit |  |  | flg22             | 2012) |
| AT5G20000 | RPT6b | 26S<br>proteasome<br>regulatory<br>AAA-ATPase<br>subunit |  |  | flg22             |       |
| AT2G32730 | RPN2a | 26S<br>proteasome<br>regulatory<br>subunit               |  |  | flg22             |       |
| AT1G75990 | RPN3b | 26S<br>proteasome<br>regulatory<br>subunit               |  |  | flg22             |       |
| AT1G29150 | RPN6  | 26S<br>proteasome<br>regulatory<br>subunit               |  |  | flg22             |       |
| AT3G11270 | RPN8b | 26S<br>proteasome<br>regulatory<br>subunit               |  |  | flg22             |       |
| AT1G53750 | RPT1a | 26S<br>proteasome<br>regulatory<br>AAA-ATPase<br>subunit |  |  | Control,<br>flg22 |       |
| AT1G45000 | RPT4b | 26S<br>proteasome<br>regulatory<br>AAA-ATPase<br>subunit |  |  | Control,<br>flg22 |       |

|           |                |                                                 |              |                                    |                |                      |
|-----------|----------------|-------------------------------------------------|--------------|------------------------------------|----------------|----------------------|
| AT2G20580 | RPN1a          | 26S proteasome regulatory subunit               |              |                                    | Control, flg22 |                      |
| AT1G20200 | RPN3a, EMB2719 | 26S proteasome regulatory subunit               |              |                                    | Control, flg22 |                      |
| AT4G24820 | RPN7           | 26S proteasome regulatory subunit               |              |                                    | Control, flg22 |                      |
| AT5G05780 | RPN8a          | 26S proteasome regulatory subunit               |              |                                    | Control, flg22 |                      |
| AT5G23540 | RPN11          | 26S proteasome regulatory subunit               |              |                                    | Control, flg22 |                      |
| AT1G09100 | RPT5b          | 26S proteasome regulatory AAA-ATPase subunit    |              |                                    | Control        |                      |
| AT1G04810 | RPN2b          | 26S proteasome regulatory subunit               |              |                                    | Control        |                      |
| AT2G02560 | CAND1, ETA2    | Cullin-associated and neddylation dissociated 1 | Ub component | Regulators of SCF (CPR1) complexes | flg22          | (Huang et al., 2016) |
| AT3G20620 |                | F-box family protein-related                    |              | Not known.                         | Control, flg22 |                      |

|           |            |                                                         |  |            |                |  |
|-----------|------------|---------------------------------------------------------|--|------------|----------------|--|
| AT3G23633 |            | F-box associated ubiquitylation effector family protein |  | Not known. | Control, flg22 |  |
| AT1G77710 | Ufm1, CCP2 | Ub-like, Ufm1                                           |  | Not known. | Control        |  |

910

911

912

**Table 3.** Examples of candidates with Ub-footprints identified from ubiquitylomes.

913

| Locus ID  | Other names      | Description                                     | Ub-footprint peptide                                                  | Ub attachment sites            | Condition             |
|-----------|------------------|-------------------------------------------------|-----------------------------------------------------------------------|--------------------------------|-----------------------|
| AT3G62150 | ABCB21, PGP21    | ABC transporter B family member 21              | SSLSRSLSK <sub>(Ub)</sub> R                                           | Lys677 of 1296                 | flg22                 |
| AT2G19590 | ACO1             | ACC oxidase 1                                   | LSK <sub>(Ub)</sub> LMCENLGLDQEDIMNA<br>FSGPK <sub>(Ub)</sub> GPAFGTK | Lys135 of 310<br>Lys156 of 310 | + Control<br>of flg22 |
| AT1G60880 | AGL56            | AGAMOUS-LIKE-56                                 | K <sub>(Ub)</sub> ASQLCLLSPATQIAILAAP<br>MTSK                         | Lys33 of 201                   | Control               |
| AT3G53230 | CDC48B           | Cell division cycle 48B                         | REK <sub>(Ub)</sub> THGEVER                                           | Lys319 of 815                  | flg22                 |
| AT1G07270 | CDC6             | Cell division control 6                         | K <sub>(Ub)</sub> DATVGELNK <sub>(Ub)</sub> LYLEICK                   | Lys427 of 505<br>Lys438 of 505 | +<br>of flg22         |
| AT4G34530 | CIB1             | Transcription factor (cryptochrome-interacting) | MKFLQDLVPGCDK <sub>(Ub)</sub> ITGK                                    | Lys210 of 335                  | Control               |
| AT1G48260 | CIPK17, SNRK3.21 | SNF1-related kinase 3.21                        | TK <sub>(Ub)</sub> IYMVLECVTGGDLFDR                                   | Lys83 of 432                   | flg22                 |
| AT3G46790 | CRR2             | Chlororespiratory reduction 2                   | GVLYELETEEK <sub>(Ub)</sub> ER                                        | Lys582 of 657                  | Control,<br>flg22     |
| AT5G06150 | CYCB1;2          | Cyclin B1;2                                     | K <sub>(Ub)</sub> PINGDNKVPALGPKR                                     | Lys77 of 445                   | flg22                 |
| AT4G38170 | FRS9             | FAR1-related sequence 9                         | ELK <sub>(Ub)</sub> ADYEATNSTPVMKTPS<br>PMEK                          | Lys275 of 545                  | Control               |
| AT5G14040 | MTP3, PHT3;1     | Phosphate transporter 3;1                       | KTYSDLAGPEYTAK <sub>(Ub)</sub> YK                                     | Lys172 of 375                  | flg22                 |

|           |        |                                                         |                                                                 |                         |                            |
|-----------|--------|---------------------------------------------------------|-----------------------------------------------------------------|-------------------------|----------------------------|
| AT5G25610 | RD22   | Responsive to dehydration 22                            | YHVRVAVSTEVAK <sub>(Ub)</sub> K                                 | Lys287<br>392           | of<br>ol                   |
| AT5G62090 | SLK2   | SEUSS-like 2                                            | YVRCLQISEVVSSMK <sub>(Ub)</sub> DMID<br>FCR                     | Lys537<br>816           | of<br>flg22                |
| AT3G23633 |        | F-box associated ubiquitylation effector family protein | SLLVCMSSSLFHEEK <sub>(Ub)</sub> K <sub>(Ub)</sub> LA<br>VCCNLNR | Lys123<br>Lys124<br>157 | + Contr<br>of ol,<br>flg22 |
| AT1G63350 |        | Resistance protein; CC-NBS-LRR family                   | K <sub>(Ub)</sub> ENLIEYWICEEIIDGSEGID<br>K                     | Lys422<br>898           | of<br>flg22                |
| AT1G77740 | PIP5K2 | Phosphatidylinositol-4-phosphate 5-kinase               | SLQADPASISAVDPK <sub>(Ub)</sub> LYSR                            | Lys736<br>754           | of Contr<br>ol             |
| AT3G26340 | PBE2   | 26S proteasome subunit beta type-5B                     | K <sub>(Ub)</sub> AVEMVK <sub>(Ub)</sub> PAK                    | Lys47<br>Lys53<br>273   | +<br>of<br>flg22           |
| AT4G24320 |        | Ub carboxyl-terminal hydrolase family protein           | K <sub>(Ub)</sub> TETDNVICLG EYLGFGMR<br>FK                     | Lys286<br>395           | of<br>flg22                |
| AT5G20000 | RPT6b  | 26S proteasome regulatory AAA-ATPase subunit            | TMLELLNQLDGF EASNK <sub>(Ub)</sub> IK<br>VLMATNR                | Lys301<br>419           | of<br>flg22                |
| AT5G46210 | CUL4   | CULLIN4, Ub E3 ligase                                   | TLQSLACGK <sub>(Ub)</sub> VRVLQK                                | Lys668<br>792           | of<br>flg22                |
| AT5G48770 |        | Resistance protein; TIR-NBS-LRR family                  | DK <sub>(Ub)</sub> TIFIRVACLFNGEPVSR                            | Lys434<br>1190          | of<br>flg22                |

915 **References**

- 916 Adams, E.H.G., and Spoel, S.H. (2018). The ubiquitin-proteasome system as a transcriptional  
917 regulator of plant immunity. *J Exp Bot* 69, 4529-4537.
- 918 Aguilar-Hernandez, V., Kim, D.Y., Stankey, R.J., Scalf, M., Smith, L.M., and Vierstra, R.D. (2017).  
919 Mass Spectrometric Analyses Reveal a Central Role for Ubiquitylation in Remodeling the  
920 Arabidopsis Proteome during Photomorphogenesis. *Mol Plant* 10, 846-865.
- 921 Albert, I., Böhm, H., Albert, M., Feiler, C.E., Imkampe, J., Wallmeroth, N., Brancato, C.,  
922 Raaymakers, T.M., Oome, S., and Zhang, H. (2015). An RLP23–SOBIR1–BAK1 complex mediates  
923 NLP-triggered immunity. *Nature Plants* 1, 1-9.
- 924 Alonso, J.M., Stepanova, A.N., Leisse, T.J., Kim, C.J., Chen, H., Shinn, P., Stevenson, D.K.,  
925 Zimmerman, J., Barajas, P., Cheuk, R., *et al.* (2003). Genome-wide insertional mutagenesis of  
926 Arabidopsis thaliana. *Science* 301, 653-657.
- 927 Asai, T., Tena, G., Plotnikova, J., Willmann, M.R., Chiu, W.L., Gomez-Gomez, L., Boller, T.,  
928 Ausubel, F.M., and Sheen, J. (2002). MAP kinase signalling cascade in Arabidopsis innate  
929 immunity. *Nature* 415, 977-983.
- 930 Bakker, E.G., Toomajian, C., Kreitman, M., and Bergelson, J. (2006). A genome-wide survey of R  
931 gene polymorphisms in Arabidopsis. *Plant Cell* 18, 1803-1818.
- 932 Bellati, J., Champeyroux, C., Hem, S., Rofidal, V., Krouk, G., Maurel, C., and Santoni, V. (2016).  
933 Novel Aquaporin Regulatory Mechanisms Revealed by Interactomics. *Mol Cell Proteomics* 15,  
934 3473-3487.
- 935 Bennett, E.J., Shaler, T.A., Woodman, B., Ryu, K.Y., Zaitseva, T.S., Becker, C.H., Bates, G.P.,  
936 Schulman, H., and Kopito, R.R. (2007). Global changes to the ubiquitin system in Huntington's  
937 disease. *Nature* 448, 704-708.
- 938 Bethke, G., Pecher, P., Eschen-Lippold, L., Tsuda, K., Katagiri, F., Glazebrook, J., Scheel, D., and  
939 Lee, J. (2012). Activation of the Arabidopsis thaliana mitogen-activated protein kinase MPK11 by  
940 the flagellin-derived elicitor peptide, flg22. *Mol Plant Microbe Interact* 25, 471-480.
- 941 Böhm, H., Albert, I., Fan, L., Reinhard, A., and Nürnberger, T.J.C.o.i.p.b. (2014). Immune receptor  
942 complexes at the plant cell surface. 20, 47-54.
- 943 Bonnot, T., Gillard, M., and Nagel, D. (2019). A Simple Protocol for Informative Visualization of  
944 Enriched Gene Ontology Terms. *Bio-Protocol* 9.
- 945 Book, A.J., Gladman, N.P., Lee, S.S., Scalf, M., Smith, L.M., and Vierstra, R.D. (2010). Affinity  
946 purification of the Arabidopsis 26 S proteasome reveals a diverse array of plant proteolytic  
947 complexes. *The Journal of biological chemistry* 285, 25554-25569.
- 948 Chen, X.L., Xie, X., Wu, L., Liu, C., Zeng, L., Zhou, X., Luo, F., Wang, G.L., and Liu, W. (2018).  
949 Proteomic Analysis of Ubiquitinated Proteins in Rice (*Oryza sativa*) After Treatment With  
950 Pathogen-Associated Molecular Pattern (PAMP) Elicitors. *Front Plant Sci* 9, 1064.
- 951 Chen, Y., Li, F., Tian, L., Huang, M., Deng, R., Li, X., Chen, W., Wu, P., Li, M., and Jiang, H.  
952 (2017). The phenylalanine ammonia lyase gene LJPAL1 is involved in plant defense responses to  
953 pathogens and plays diverse roles in Lotus japonicus-rhizobium symbioses. *Molecular Plant-  
954 Microbe Interactions* 30, 739-753.
- 955 Cheng, Y.T., and Li, X. (2012). Ubiquitination in NB-LRR-mediated immunity. *Curr Opin Plant  
956 Biol* 15, 392-399.
- 957 Cheng, Y.T., Li, Y.Z., Huang, S.A., Huang, Y., Dong, X.N., Zhang, Y.L., and Li, X. (2011). Stability

958 of plant immune-receptor resistance proteins is controlled by SKP1-CULLIN1-F-box (SCF)-  
959 mediated protein degradation. *PNAS* *108*, 14694-14699.

960 Cheng, Z., Li, J.F., Niu, Y., Zhang, X.C., Woody, O.Z., Xiong, Y., Djonovic, S., Millet, Y., Bush, J.,  
961 McConkey, B.J., *et al.* (2015). Pathogen-secreted proteases activate a novel plant immune pathway.  
962 *Nature* *521*, 213-216.

963 Clay, N.K., Adio, A.M., Denoux, C., Jander, G., and Ausubel, F.M. (2009). Glucosinolate  
964 metabolites required for an Arabidopsis innate immune response. *Science* *323*, 95-101.

965 Collins, N.C., Thordal-Christensen, H., Lipka, V., Bau, S., Kombrink, E., Qiu, J.L., Huckelhoven,  
966 R., Stein, M., Freialdenhoven, A., Somerville, S.C., *et al.* (2003). SNARE-protein-mediated disease  
967 resistance at the plant cell wall. *Nature* *425*, 973-977.

968 Couto, D., and Zipfel, C. (2016). Regulation of pattern recognition receptor signalling in plants. *Nat*  
969 *Rev Immunol* *16*, 537-552.

970 Cui, H., Tsuda, K., and Parker, J.E. (2015). Effector-triggered immunity: from pathogen perception  
971 to robust defense. *Annual review of plant biology* *66*, 487-511.

972 DIELEN, A.S., Badaoui, S., Candresse, T., and GERMAN-RETANA, S. (2010). The ubiquitin/26S  
973 proteasome system in plant-pathogen interactions: a never-ending hide-and-seek game. *Molecular*  
974 *plant pathology* *11*, 293-308.

975 Eschen-Lippold, L., Bethke, G., Palm-Forster, M.A., Pecher, P., Bauer, N., Glazebrook, J., Scheel,  
976 D., and Lee, J. (2012). MPK11—a fourth elicitor-responsive mitogen-activated protein kinase in  
977 Arabidopsis thaliana. *Plant signaling & behavior* *7*, 1203-1205.

978 Ewan, R., Pangestuti, R., Thornber, S., Craig, A., Carr, C., O'Donnell, L., Zhang, C., and  
979 Sadanandom, A. (2011). Deubiquitinating enzymes AtUBP12 and AtUBP13 and their tobacco  
980 homologue NtUBP12 are negative regulators of plant immunity. *New Phytol* *191*, 92-106.

981 Finley, D. (2009). Recognition and processing of ubiquitin-protein conjugates by the proteasome.  
982 *Annual review of biochemistry* *78*, 477-513.

983 Fuchs, R., Kopischke, M., Klapprodt, C., Hause, G., Meyer, A.J., Schwarzlander, M., Fricker, M.D.,  
984 and Lipka, V. (2016). Immobilized Subpopulations of Leaf Epidermal Mitochondria Mediate  
985 PENETRATION2-Dependent Pathogen Entry Control in Arabidopsis. *Plant Cell* *28*, 130-145.

986 Furlan, G., Nakagami, H., Eschen-Lippold, L., Jiang, X., Majovsky, P., Kowarschik, K.,  
987 Hoehenwarter, W., Lee, J., and Trujillo, M. (2017). Changes in PUB22 Ubiquitination Modes  
988 Triggered by MITOGEN-ACTIVATED PROTEIN KINASE3 Dampen the Immune Response. *The*  
989 *Plant cell* *29*, 726-745.

990 Furniss, J.J., Grey, H., Wang, Z., Nomoto, M., Jackson, L., Tada, Y., and Spoel, S.H. (2018a).  
991 Proteasome-associated HECT-type ubiquitin ligase activity is required for plant immunity. *PLoS*  
992 *Pathog* *14*, e1007447.

993 Furniss, J.J., Grey, H., Wang, Z., Nomoto, M., Jackson, L., Tada, Y., and Spoel, S.H. (2018b).  
994 Proteasome-associated HECT-type ubiquitin ligase activity is required for plant immunity. *PLoS*  
995 *pathogens* *14*, e1007447.

996 Furniss, J.J., Grey, H., Wang, Z., Nomoto, M., Jackson, L., Tada, Y., and Spoel, S.H.J.P.p. (2018c).  
997 Proteasome-associated HECT-type ubiquitin ligase activity is required for plant immunity. *14*,  
998 e1007447.

999 Goritschnig, S., Zhang, Y., and Li, X. (2007). The ubiquitin pathway is required for innate immunity  
1000 in Arabidopsis. *The Plant Journal* *49*, 540-551.



- 1001 Gou, M., Shi, Z., Zhu, Y., Bao, Z., Wang, G., and Hua, J. (2012). The F-box protein CPR1/CPR30  
1002 negatively regulates R protein SNC1 accumulation. *Plant J* 69, 411-420.
- 1003 Gou, M., Su, N., Zheng, J., Huai, J., Wu, G., Zhao, J., He, J., Tang, D., Yang, S., and Wang,  
1004 G.J.T.P.J. (2009). An F-box gene, CPR30, functions as a negative regulator of the defense response  
1005 in Arabidopsis. 60, 757-770.
- 1006 Gu, Y., and Innes, R.W. (2011). The KEEP ON GOING protein of Arabidopsis recruits the  
1007 ENHANCED DISEASE RESISTANCE1 protein to trans-Golgi network/early endosome vesicles.  
1008 *Plant Physiol* 155, 1827-1838.
- 1009 Gu, Y., Zavaliev, R., and Dong, X.J.M.p. (2017). Membrane trafficking in plant immunity. 10,  
1010 1026-1034.
- 1011 Guerra, D.D., and Callis, J. (2012). Ubiquitin on the move: the ubiquitin modification system plays  
1012 diverse roles in the regulation of endoplasmic reticulum- and plasma membrane-localized proteins.  
1013 *Plant Physiol* 160, 56-64.
- 1014 Heidrich, K., Wirthmueller, L., Tasset, C., Pouzet, C., Deslandes, L., and Parker, J.E. (2011).  
1015 Arabidopsis EDS1 connects pathogen effector recognition to cell compartment-specific immune  
1016 responses. *Science* 334, 1401-1404.
- 1017 Hjerpe, R., Aillet, F., Lopitz-Otsoa, F., Lang, V., England, P., and Rodriguez, M.S. (2009). Efficient  
1018 protection and isolation of ubiquitylated proteins using tandem ubiquitin-binding entities. *EMBO*  
1019 *reports* 10, 1250-1258.
- 1020 Hou, S., Wang, X., Chen, D., Yang, X., Wang, M., Turra, D., Di Pietro, A., and Zhang, W. (2014).  
1021 The secreted peptide PIP1 amplifies immunity through receptor-like kinase 7. *PLoS pathogens* 10,  
1022 e1004331.
- 1023 Hou, X., and Gao, Y. (2017). Investigation on the Interaction of Pseudomonas syringae Effector  
1024 AvrPto with AtRabE1d GTPase. *Protein and peptide letters* 24, 661-667.
- 1025 Hu, H.B., and Sun, S.C. (2016). Ubiquitin signaling in immune responses. *Cell research* 26, 457-  
1026 483.
- 1027 Huang da, W., Sherman, B.T., and Lempicki, R.A. (2009). Systematic and integrative analysis of  
1028 large gene lists using DAVID bioinformatics resources. *Nature protocols* 4, 44-57.
- 1029 Huang, J., Gu, M., Lai, Z., Fan, B., Shi, K., Zhou, Y.H., Yu, J.Q., and Chen, Z. (2010). Functional  
1030 analysis of the Arabidopsis PAL gene family in plant growth, development, and response to  
1031 environmental stress. *Plant Physiol* 153, 1526-1538.
- 1032 Huang, S., Chen, X., Zhong, X., Li, M., Ao, K., Huang, J., and Li, X. (2016). Plant TRAF Proteins  
1033 Regulate NLR Immune Receptor Turnover. *Cell Host Microbe* 20, 271.
- 1034 Isono, E., and Nagel, M.K. (2014). Deubiquitylating enzymes and their emerging role in plant  
1035 biology. *Front Plant Sci* 5, 56.
- 1036 Iwai, K., and Tokunaga, F. (2009). Linear polyubiquitination: a new regulator of NF-kappaB  
1037 activation. *EMBO reports* 10, 706-713.
- 1038 Jacobs, A.K., Lipka, V., Burton, R.A., Panstruga, R., Strizhov, N., Schulze-Lefert, P., and Fincher,  
1039 G.B. (2003). An Arabidopsis callose synthase, GSL5, is required for wound and papillary callose  
1040 formation. *The Plant Cell* 15, 2503-2513.
- 1041 Kim, D.Y., Scalf, M., Smith, L.M., and Vierstra, R.D. (2013). Advanced proteomic analyses yield a  
1042 deep catalog of ubiquitylation targets in Arabidopsis. *The Plant cell* 25, 1523-1540.
- 1043 Kim, S.J., Kim, M.R., Bedgar, D.L., Moinuddin, S.G., Cardenas, C.L., Davin, L.B., Kang, C., and

- 1044 Lewis, N.G. (2004). Functional reclassification of the putative cinnamyl alcohol dehydrogenase  
1045 multigene family in Arabidopsis. *Proc Natl Acad Sci U S A* *101*, 1455-1460.
- 1046 Kleinboelting, N., Huep, G., Kloetgen, A., Viehoveer, P., and Weisshaar, B. (2012). GABI-Kat  
1047 SimpleSearch: new features of the Arabidopsis thaliana T-DNA mutant database. *Nucleic Acids Res*  
1048 *40*, D1211-1215.
- 1049 Komander, D., and Rape, M. (2012). The ubiquitin code. *Annu Rev Biochem* *81*, 203-229.
- 1050 Lachaud, C., Prigent, E., Thuleau, P., Grat, S., Da Silva, D., Brière, C., Mazars, C., and Cotelle, V.  
1051 (2013). 14-3-3-Regulated Ca<sup>2+</sup>-dependent protein kinase CPK3 is required for sphingolipid-  
1052 induced cell death in Arabidopsis. *Cell Death & Differentiation* *20*, 209-217.
- 1053 Le, M.H., Cao, Y., Zhang, X.C., and Stacey, G. (2014). LIK1, a CERK1-interacting kinase,  
1054 regulates plant immune responses in Arabidopsis. *PLoS One* *9*, e102245.
- 1055 Lee, B.-J., Kwon, S.J., Kim, S.-K., Kim, K.-J., Park, C.-J., Kim, Y.-J., Park, O.K., and Paek, K.-H.  
1056 (2006). Functional study of hot pepper 26S proteasome subunit RPN7 induced by Tobacco mosaic  
1057 virus from nuclear proteome analysis. *Biochemical and biophysical research communications* *351*,  
1058 405-411.
- 1059 Li, L., Habring, A., Wang, K., and Weigel, D. (2020). Atypical Resistance Protein RPW8/HR  
1060 Triggers Oligomerization of the NLR Immune Receptor RPP7 and Autoimmunity. *Cell Host*  
1061 *Microbe* *27*, 405-417 e406.
- 1062 Li, Y., Kabbage, M., Liu, W., and Dickman, M.B. (2016). Aspartyl protease-mediated cleavage of  
1063 BAG6 is necessary for autophagy and fungal resistance in plants. *The Plant Cell* *28*, 233-247.
- 1064 Liang, X., Ding, P., Lian, K., Wang, J., Ma, M., Li, L., Li, L., Li, M., Zhang, X., Chen, S., *et al.*  
1065 (2016). Arabidopsis heterotrimeric G proteins regulate immunity by directly coupling to the FLS2  
1066 receptor. *Elife* *5*, e13568.
- 1067 Liao, D., Cao, Y., Sun, X., Espinoza, C., Nguyen, C.T., Liang, Y., and Stacey, G. (2017).  
1068 Arabidopsis E3 ubiquitin ligase PLANT U-BOX13 (PUB13) regulates chitin receptor LYSIN  
1069 MOTIF RECEPTOR KINASE5 (LYK5) protein abundance. *The New phytologist* *214*, 1646-1656.
- 1070 Liebrand, T.W., van den Burg, H.A., and Joosten, M.H. (2014). Two for all: receptor-associated  
1071 kinases SOBIR1 and BAK1. *Trends in plant science* *19*, 123-132.
- 1072 Liu, J., Ding, P., Sun, T., Nitta, Y., Dong, O., Huang, X., Yang, W., Li, X., Botella, J.R., and Zhang,  
1073 Y. (2013). Heterotrimeric G proteins serve as a converging point in plant defense signaling activated  
1074 by multiple receptor-like kinases. *Plant physiology* *161*, 2146-2158.
- 1075 Liu, J., Li, H., Miao, M., Tang, X., Giovannoni, J., Xiao, F., and Liu, Y. (2012a). The tomato UV-  
1076 damaged DNA-binding protein-1 (DDB1) is implicated in pathogenesis-related (PR) gene  
1077 expression and resistance to *Agrobacterium tumefaciens*. *Molecular plant pathology* *13*, 123-134.
- 1078 Liu, J., Li, H., Miao, M., Tang, X., Giovannoni, J., Xiao, F., and Liu, Y.J.M.p.p. (2012b). The  
1079 tomato UV-damaged DNA-binding protein-1 (DDB1) is implicated in pathogenesis-related (PR)  
1080 gene expression and resistance to *Agrobacterium tumefaciens*. *13*, 123-134.
- 1081 Lu, D., Lin, W., Gao, X., Wu, S., Cheng, C., Avila, J., Heese, A., Devarenne, T.P., He, P., and Shan,  
1082 L. (2011). Direct ubiquitination of pattern recognition receptor FLS2 attenuates plant innate  
1083 immunity. *Science* *332*, 1439-1442.
- 1084 Ma, X., Claus, L.A.N., Leslie, M.E., Tao, K., Wu, Z., Liu, J., Yu, X., Li, B., Zhou, J., Savatin, D.V.,  
1085 *et al.* (2020). Ligand-induced monoubiquitination of BIK1 regulates plant immunity. *Nature* *581*,  
1086 199-203.

- 1087 Maor, R., Jones, A., Nuhse, T.S., Studholme, D.J., Peck, S.C., and Shirasu, K. (2007).  
1088 Multidimensional protein identification technology (MudPIT) analysis of ubiquitinated proteins in  
1089 plants. *Mol Cell Proteomics* 6, 601-610.
- 1090 Marino, D., Peeters, N., and Rivas, S. (2012). Ubiquitination during plant immune signaling. *Plant*  
1091 *physiology* 160, 15-27.
- 1092 Marshall, R.S., Li, F., Gemperline, D.C., Book, A.J., and Vierstra, R.D. (2015). Autophagic  
1093 Degradation of the 26S Proteasome Is Mediated by the Dual ATG8/Ubiquitin Receptor RPN10 in  
1094 Arabidopsis. *Molecular cell* 58, 1053-1066.
- 1095 Marshall, R.S., and Vierstra, R.D. (2018). Autophagy: The Master of Bulk and Selective Recycling.  
1096 *Annual review of plant biology* 69, 173-208.
- 1097 Meng, X., and Zhang, S. (2013). MAPK cascades in plant disease resistance signaling. *Annual*  
1098 *review of phytopathology* 51, 245-266.
- 1099 Meyer, D., Pajonk, S., Micali, C., O'Connell, R., and Schulze-Lefert, P.J.T.P.J. (2009). Extracellular  
1100 transport and integration of plant secretory proteins into pathogen-induced cell wall compartments.  
1101 *57*, 986-999.
- 1102 Miao, Y., and Zentgraf, U. (2010). A HECT E3 ubiquitin ligase negatively regulates Arabidopsis  
1103 leaf senescence through degradation of the transcription factor WRKY53. *The Plant Journal* 63,  
1104 179-188.
- 1105 Monaghan, J., and Li, X. (2010). The HEAT repeat protein ILITYHIA is required for plant  
1106 immunity. *Plant and cell physiology* 51, 742-753.
- 1107 Monaghan, J., Li, X.J.P., and physiology, c. (2010). The HEAT repeat protein ILITYHIA is required  
1108 for plant immunity. *51*, 742-753.
- 1109 Monaghan, J., Xu, F., Gao, M., Zhao, Q., Palma, K., Long, C., Chen, S., Zhang, Y., and Li, X.  
1110 (2009). Two Prp19-like U-box proteins in the MOS4-associated complex play redundant roles in  
1111 plant innate immunity. *PLoS Pathogens* 5.
- 1112 Mondragon-Palomino, M., Stam, R., John-Arputharaj, A., and Dresselhaus, T. (2017).  
1113 Diversification of defensins and NLRs in Arabidopsis species by different evolutionary  
1114 mechanisms. *BMC Evol Biol* 17, 255.
- 1115 Mural, R.V., Liu, Y., Rosebrock, T.R., Brady, J.J., Hamera, S., Connor, R.A., Martin, G.B., and  
1116 Zeng, L. (2013). The tomato Fni3 lysine-63-specific ubiquitin-conjugating enzyme and suv  
1117 ubiquitin E2 variant positively regulate plant immunity. *Plant Cell* 25, 3615-3631.
- 1118 Murata, S., Yashiroda, H., and Tanaka, K. (2009). Molecular mechanisms of proteasome assembly.  
1119 *Nature reviews Molecular cell biology* 10, 104-115.
- 1120 Nakashima, A., Chen, L., Thao, N.P., Fujiwara, M., Wong, H.L., Kuwano, M., Umemura, K.,  
1121 Shirasu, K., Kawasaki, T., and Shimamoto, K. (2008). RACK1 functions in rice innate immunity by  
1122 interacting with the Rac1 immune complex. *Plant Cell* 20, 2265-2279.
- 1123 Nicaise, V., Joe, A., Jeong, B., Korneli, C., Boutrot, F., Wested, I., Staiger, D., Alfano, J., and Zipfel,  
1124 C. (2013). Pseudomonas HopU1 affects interaction of plant immune receptor mRNAs to the RNA-  
1125 binding protein GRP7. *EMBO J* 32, 701-712.
- 1126 Okumoto, K., Misono, S., Miyata, N., Matsumoto, Y., Mukai, S., and Fujiki, Y. (2011). Cysteine  
1127 ubiquitination of PTS1 receptor Pex5p regulates Pex5p recycling. *Traffic* 12, 1067-1083.
- 1128 Ordureau, A., Paulo, J.A., Zhang, J., An, H., Swatek, K.N., Cannon, J.R., Wan, Q., Komander, D.,  
1129 and Harper, J.W. (2020). Global Landscape and Dynamics of Parkin and USP30-Dependent

- 1130 Ubiquitylomes in iNeurons during Mitophagic Signaling. *Molecular cell* 77, 1124-1142 e1110.
- 1131 Paez Valencia, J., Goodman, K., and Otegui, M.S. (2016). Endocytosis and Endosomal Trafficking  
1132 in Plants. *Annual review of plant biology* 67, 309-335.
- 1133 Palm, D., Streit, D., Shanmugam, T., Weis, B.L., Ruprecht, M., Simm, S., and Schleiff, E. (2019).  
1134 Plant-specific ribosome biogenesis factors in *Arabidopsis thaliana* with essential function in rRNA  
1135 processing. *Nucleic Acids Res* 47, 1880-1895.
- 1136 Parker, J.E., Holub, E.B., Frost, L.N., Falk, A., Gunn, N.D., and Daniels, M.J. (1996).  
1137 Characterization of eds1, a mutation in *Arabidopsis* suppressing resistance to *Peronospora parasitica*  
1138 specified by several different RPP genes. *The Plant Cell* 8, 2033-2046.
- 1139 Pastorczyk, M., and Bednarek, P. (2016). The function of glucosinolates and related metabolites in  
1140 plant innate immunity. In *Advances in Botanical Research* (Elsevier), pp. 171-198.
- 1141 Pecher, P., Eschen-Lippold, L., Herklotz, S., Kuhle, K., Naumann, K., Bethke, G., Uhrig, J., Weyhe,  
1142 M., Scheel, D., and Lee, J. (2014). The *Arabidopsis thaliana* mitogen-activated protein kinases  
1143 MPK 3 and MPK 6 target a subclass of 'VQ-motif'-containing proteins to regulate immune  
1144 responses. *New Phytologist* 203, 592-606.
- 1145 Peng, J., Schwartz, D., Elias, J.E., Thoreen, C.C., Cheng, D., Marsischky, G., Roelofs, J., Finley, D.,  
1146 and Gygi, S.P. (2003). A proteomics approach to understanding protein ubiquitination. *Nat*  
1147 *Biotechnol* 21, 921-926.
- 1148 Perraki, A., Gronnier, J., Gouguet, P., Boudsocq, M., Deroubaix, A.-F., Simon, V., German-Retana,  
1149 S., Zipfel, C., Bayer, E., and Mongrand, S. (2017). The plant calcium-dependent protein kinase  
1150 CPK3 phosphorylates REM1.3 to restrict viral infection. *BioRxiv*, 205765.
- 1151 Pitorre, D., Llauro, C., Jobet, E., Guillemot, J., Brizard, J.-P., Delseny, M., and Lasserre, E.  
1152 (2010). RLK7, a leucine-rich repeat receptor-like kinase, is required for proper germination speed  
1153 and tolerance to oxidative stress in *Arabidopsis thaliana*. *Planta* 232, 1339-1353.
- 1154 Qin, L., Zhou, Z., Li, Q., Zhai, C., Liu, L., Quilichini, T.D., Gao, P., Kessler, S.A., Jaillais, Y., Datla,  
1155 R., *et al.* (2020). Specific Recruitment of Phosphoinositide Species to the Plant-Pathogen Interfacial  
1156 Membrane Underlies *Arabidopsis* Susceptibility to Fungal Infection. *Plant Cell* 32, 1665-1688.
- 1157 Raasi, S., Orlov, I., Fleming, K.G., and Pickart, C.M. (2004). Binding of polyubiquitin chains to  
1158 ubiquitin-associated (UBA) domains of HHR23A. *Journal of molecular biology* 341, 1367-1379.
- 1159 Rayapuram, N., Bigeard, J., Alhoraibi, H., Bonhomme, L., Hesse, A.M., Vinh, J., Hirt, H., and  
1160 Pflieger, D. (2018). Quantitative Phosphoproteomic Analysis Reveals Shared and Specific Targets  
1161 of *Arabidopsis* Mitogen-Activated Protein Kinases (MAPKs) MPK3, MPK4, and MPK6. *Mol Cell*  
1162 *Proteomics* 17, 61-80.
- 1163 Revers, F., Guiraud, T., Houvenaghel, M.-C., Mauduit, T., Le Gall, O., and Candresse, T. (2003).  
1164 Multiple resistance phenotypes to Lettuce mosaic virus among *Arabidopsis thaliana* accessions.  
1165 *Molecular plant-microbe interactions* 16, 608-616.
- 1166 Reyes, F.C., Buono, R., and Otegui, M.S. (2011). Plant endosomal trafficking pathways. *Current*  
1167 *opinion in plant biology* 14, 666-673.
- 1168 Rodrigues, O., Reshetnyak, G., Grondin, A., Saijo, Y., Leonhardt, N., Maurel, C., and Verdoucq, L.  
1169 (2017). Aquaporins facilitate hydrogen peroxide entry into guard cells to mediate ABA- and  
1170 pathogen-triggered stomatal closure. *Proceedings of the National Academy of Sciences* 114, 9200-  
1171 9205.
- 1172 Romero-Barrios, N., and Vert, G. (2018). Proteasome-independent functions of lysine-63

- 1173 polyubiquitination in plants. *The New phytologist* *217*, 995-1011.
- 1174 Saracco, S.A., Hansson, M., Scalf, M., Walker, J.M., Smith, L.M., and Vierstra, R.D. (2009).
- 1175 Tandem affinity purification and mass spectrometric analysis of ubiquitylated proteins in
- 1176 *Arabidopsis*. *Plant J* *59*, 344-358.
- 1177 Shannon, P., Markiel, A., Ozier, O., Baliga, N.S., Wang, J.T., Ramage, D., Amin, N., Schwikowski,
- 1178 B., and Ideker, T.J.G.r. (2003). Cytoscape: a software environment for integrated models of
- 1179 biomolecular interaction networks. *13*, 2498-2504.
- 1180 Shimizu, Y., Okuda-Shimizu, Y., and Hendershot, L.M. (2010). Ubiquitylation of an ERAD
- 1181 substrate occurs on multiple types of amino acids. *Molecular cell* *40*, 917-926.
- 1182 Skubacz, A., Daszkowska-Golec, A., and Szarejko, L. (2016). The Role and Regulation of ABI5
- 1183 (ABA-Insensitive 5) in Plant Development, Abiotic Stress Responses and Phytohormone Crosstalk.
- 1184 *Front Plant Sci* *7*.
- 1185 Smalle, J., and Vierstra, R.D. (2004). The ubiquitin 26S proteasome proteolytic pathway. *Annual*
- 1186 *review of plant biology* *55*, 555-590.
- 1187 Speth, E.B., Imboden, L., Hauck, P., and He, S.Y. (2009a). Subcellular localization and functional
- 1188 analysis of the *Arabidopsis* GTPase RabE. *Plant physiology* *149*, 1824-1837.
- 1189 Speth, E.B., Imboden, L., Hauck, P., and He, S.Y. (2009b). Subcellular Localization and Functional
- 1190 Analysis of the *Arabidopsis* GTPase RabE. *149*, 1824-1837.
- 1191 Spoel, S.H., and Dong, X. (2012). How do plants achieve immunity? Defence without specialized
- 1192 immune cells. *Nature reviews Immunology* *12*, 89-100.
- 1193 Stegmann, M., Anderson, R.G., Ichimura, K., Pecenkova, T., Reuter, P., Zarsky, V., McDowell,
- 1194 J.M., Shirasu, K., and Trujillo, M. (2012). The ubiquitin ligase PUB22 targets a subunit of the
- 1195 exocyst complex required for PAMP-triggered responses in *Arabidopsis*. *Plant Cell* *24*, 4703-4716.
- 1196 Stringlis, I.A., Yu, K., Feussner, K., de Jonge, R., Van Bentum, S., Van Verk, M.C., Berendsen, R.L.,
- 1197 Bakker, P.A., Feussner, I., and Pieterse, C.M. (2018). MYB72-dependent coumarin exudation
- 1198 shapes root microbiome assembly to promote plant health. *Proceedings of the National Academy of*
- 1199 *Sciences* *115*, E5213-E5222.
- 1200 Su, J., Xu, J., and Zhang, S. (2015). RACK1, scaffolding a heterotrimeric G protein and a MAPK
- 1201 cascade. *Trends Plant Sci* *20*, 405-407.
- 1202 Su, J., Yang, L., Zhu, Q., Wu, H., He, Y., Liu, Y., Xu, J., Jiang, D., and Zhang, S. (2018). Active
- 1203 photosynthetic inhibition mediated by MPK3/MPK6 is critical to effector-triggered immunity. *PLoS*
- 1204 *biology* *16*, e2004122.
- 1205 Szklarczyk, D., Franceschini, A., Wyder, S., Forslund, K., Heller, D., Huerta-Cepas, J., Simonovic,
- 1206 M., Roth, A., Santos, A., Tsafou, K.P., *et al.* (2015). STRING v10: protein-protein interaction
- 1207 networks, integrated over the tree of life. *Nucleic Acids Res* *43*, D447-452.
- 1208 Tan, X., Meyers, B.C., Kozik, A., West, M.A., Morgante, M., St Clair, D.A., Bent, A.F., and
- 1209 Michelmore, R.W. (2007). Global expression analysis of nucleotide binding site-leucine rich repeat-
- 1210 encoding and related genes in *Arabidopsis*. *BMC Plant Biol* *7*, 56.
- 1211 Tarutani, Y., Morimoto, T., Sasaki, A., Yasuda, M., Nakashita, H., Yoshida, S., Yamaguchi, I., and
- 1212 Suzuki, Y. (2004). Molecular characterization of two highly homologous receptor-like kinase genes,
- 1213 RLK902 and RKL1, in *Arabidopsis thaliana*. *Biosci Biotechnol Biochem* *68*, 1935-1941.
- 1214 Thordal-Christensen, H. (2003). Fresh insights into processes of nonhost resistance. *Curr Opin*
- 1215 *Plant Biol* *6*, 351-357.

- 1216 Tronchet, M., Balague, C., Kroj, T., Jouanin, L., and Roby, D. (2010). Cinnamyl alcohol  
1217 dehydrogenases-C and D, key enzymes in lignin biosynthesis, play an essential role in disease  
1218 resistance in Arabidopsis. *Molecular plant pathology* *11*, 83-92.
- 1219 Trujillo, M., and Shirasu, K. (2010). Ubiquitination in plant immunity. *Current opinion in plant*  
1220 *biology* *13*, 402-408.
- 1221 Udeshi, N.D., Svinkina, T., Mertins, P., Kuhn, E., Mani, D.R., Qiao, J.W., and Carr, S.A. (2013).  
1222 Refined Preparation and Use of Anti-diglycine Remnant (K-epsilon-GG) Antibody Enables Routine  
1223 Quantification of 10,000s of Ubiquitination Sites in Single Proteomics Experiments. *Molecular &*  
1224 *Cellular Proteomics* *12*, 825-831.
- 1225 Urano, D., Chen, J.G., Botella, J.R., and Jones, A.M. (2013). Heterotrimeric G protein signalling in  
1226 the plant kingdom. *Open Biol* *3*, 120186.
- 1227 Üstün, S., Sheikh, A., Gimenez-Ibanez, S., Jones, A., Ntoukakis, V., and Börnke, F. (2016). The  
1228 proteasome acts as a hub for plant immunity and is targeted by *Pseudomonas* type III effectors.  
1229 *Plant Physiology* *172*, 1941-1958.
- 1230 van Nocker, S., Walker, J.M., and Vierstra, R.D. (1996). The Arabidopsis thaliana UBC7/13/14  
1231 genes encode a family of multiubiquitin chain-forming E2 enzymes. *The Journal of biological*  
1232 *chemistry* *271*, 12150-12158.
- 1233 Vierstra, R.D. (2009). The ubiquitin-26S proteasome system at the nexus of plant biology. *Nat Rev*  
1234 *Mol Cell Biol* *10*, 385-397.
- 1235 Wang, J., Grubb, L.E., Wang, J., Liang, X., Li, L., Gao, C., Ma, M., Feng, F., Li, M., Li, L., *et al.*  
1236 (2018). A Regulatory Module Controlling Homeostasis of a Plant Immune Kinase. *Molecular cell*.
- 1237 Wang, L., Wen, R., Wang, J., Xiang, D., Wang, Q., Zang, Y., Wang, Z., Huang, S., Li, X., and Datla,  
1238 R.J.N.P. (2019). Arabidopsis UBC 13 differentially regulates two programmed cell death pathways  
1239 in responses to pathogen and low-temperature stress. *221*, 919-934.
- 1240 Wawrzynska, A., Rodibaugh, N.L., and Innes, R.W. (2010). Synergistic activation of defense  
1241 responses in Arabidopsis by simultaneous loss of the GSL5 callose synthase and the EDR1 protein  
1242 kinase. *Mol Plant Microbe Interact* *23*, 578-584.
- 1243 Wen, R., Torres-Acosta, J.A., Pastushok, L., Lai, X., Pelzer, L., Wang, H., and Xiao, W. (2008).  
1244 Arabidopsis UEV1D promotes Lysine-63-linked polyubiquitination and is involved in DNA  
1245 damage response. *The Plant cell* *20*, 213-227.
- 1246 Yao, C., Wu, Y., Nie, H., and Tang, D. (2012). RPN1a, a 26S proteasome subunit, is required for  
1247 innate immunity in Arabidopsis. *The Plant journal : for cell and molecular biology* *71*, 1015-1028.
- 1248 Yu, X., Feng, B., He, P., and Shan, L. (2017). From Chaos to Harmony: Responses and Signaling  
1249 upon Microbial Pattern Recognition. *Annual review of phytopathology* *55*, 109-137.
- 1250 Zamioudis, C., Hanson, J., and Pieterse, C.M. (2014).  $\beta$ -Glucosidase BGLU 42 is a MYB 72-  
1251 dependent key regulator of rhizobacteria-induced systemic resistance and modulates iron deficiency  
1252 responses in Arabidopsis roots. *New Phytologist* *204*, 368-379.
- 1253 Zhao, J., Zhou, H., Zhang, M., Gao, Y., Li, L., Gao, Y., Li, M., Yang, Y., Guo, Y., and Li, X. (2016).  
1254 Ubiquitin-specific protease 24 negatively regulates abscisic acid signalling in Arabidopsis thaliana.  
1255 *Plant, cell & environment* *39*, 427-440.
- 1256 Zhao, Y., Wu, G., Shi, H., and Tang, D. (2019). RECEPTOR-LIKE KINASE 902 Associates with  
1257 and Phosphorylates BRASSINOSTEROID-SIGNALING KINASE1 to Regulate Plant Immunity.  
1258 *Mol Plant* *12*, 59-70.

- 1259 Zhou, B., and Zeng, L. (2017). Conventional and unconventional ubiquitination in plant immunity.  
1260 *Molecular plant pathology* *18*, 1313-1330.
- 1261 Zhou, J.-M., and Zhang, Y. (2020). Plant Immunity: Danger Perception and Signaling. *Cell*.
- 1262 Zhou, J., He, P., and Shan, L. (2014). Ubiquitination of plant immune receptors. *Methods Mol Biol*  
1263 *1209*, 219-231.
- 1264 Zhou, J., Liu, D., Wang, P., Ma, X., Lin, W., Chen, S., Mishev, K., Lu, D., Kumar, R., Vanhoutte, I.,  
1265 *et al.* (2018). Regulation of Arabidopsis brassinosteroid receptor BRI1 endocytosis and degradation  
1266 by plant U-box PUB12/PUB13-mediated ubiquitination. *Proc Natl Acad Sci U S A* *115*, E1906-  
1267 E1915.
- 1268 Zhou, J., Lu, D., Xu, G., Finlayson, S.A., He, P., and Shan, L. (2015). The dominant negative ARM  
1269 domain uncovers multiple functions of PUB13 in Arabidopsis immunity, flowering, and senescence.  
1270 *J Exp Bot* *66*, 3353-3366.
- 1271

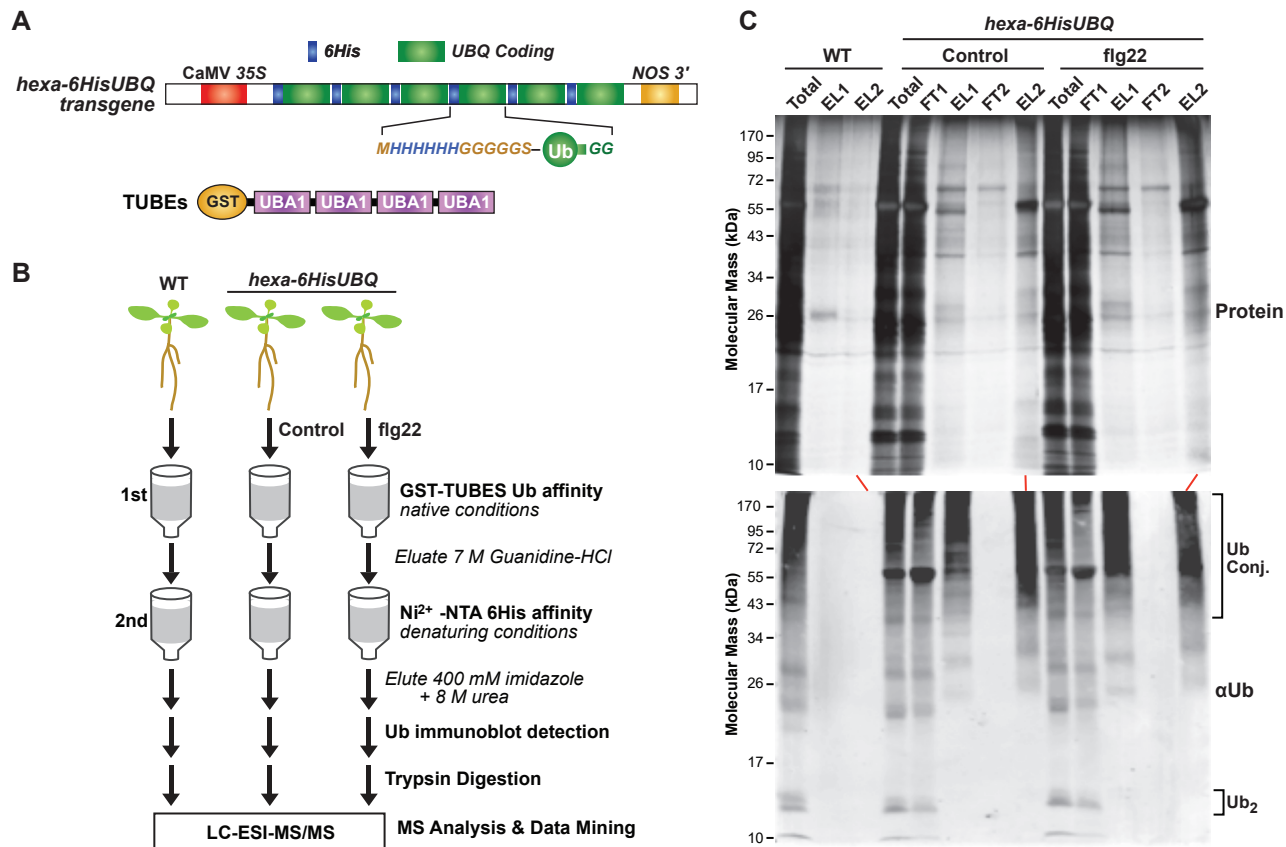

**Figure 1. Two-step affinity purification of ubiquitylated proteins from transgenic Arabidopsis expressing 6HIS-UBQ treated with or without flg22.**

**A.** Diagram of the p35S:hexa-6HIS-UBQ transgene. A synthetic UBQ gene encoding six repeats of a Ub monomer N-terminally tagged with a 6His sequence followed by a glycine (G)-rich linker (MHHHHHHGGGGGSA) was fused head-to-tail to form a single in-frame hexa-6His-UBQ transgene expressed under the control of the constitutive CaMV 35S promoter (Saracco et al., 2009).

**B.** Flow chart describing the proteomic approach to stringently identify Ub conjugates from Arabidopsis p35S::hexa-6HIS-UBQ seedlings. Ubiquitylated proteins were first enriched by the UBA-Ub affinity using GST-TUBEs beads under the native condition followed by Ni-NTA chromatography under the denaturing condition. The eluants were digested with trypsin and subjected to LC/ESI-MS/MS analysis.

**C and D.** Ubiquitylated proteins isolated from Arabidopsis plants expressing 6His-Ub by the two-step affinity purification. Ubiquitylated proteins enriched as outlined in (B) were subjected to SDS-PAGE and by either stained for protein with silver (C) or immunoblotted with anti-Ub antibodies (D). Samples from wild-type seedlings (WT) purified with both GST-TUBEs and Ni-NTA beads were included for comparison. FT and EL represent the flow-through and eluted fractions, respectively, from the Ub affinity (1) and Ni-NTA affinity columns (2). The total represents the total protein extracts before affinity purifications. The migration positions of the Ub dimers (Ub<sub>2</sub>), and Ub conjugates (Ub-conj) are indicated by the brackets.



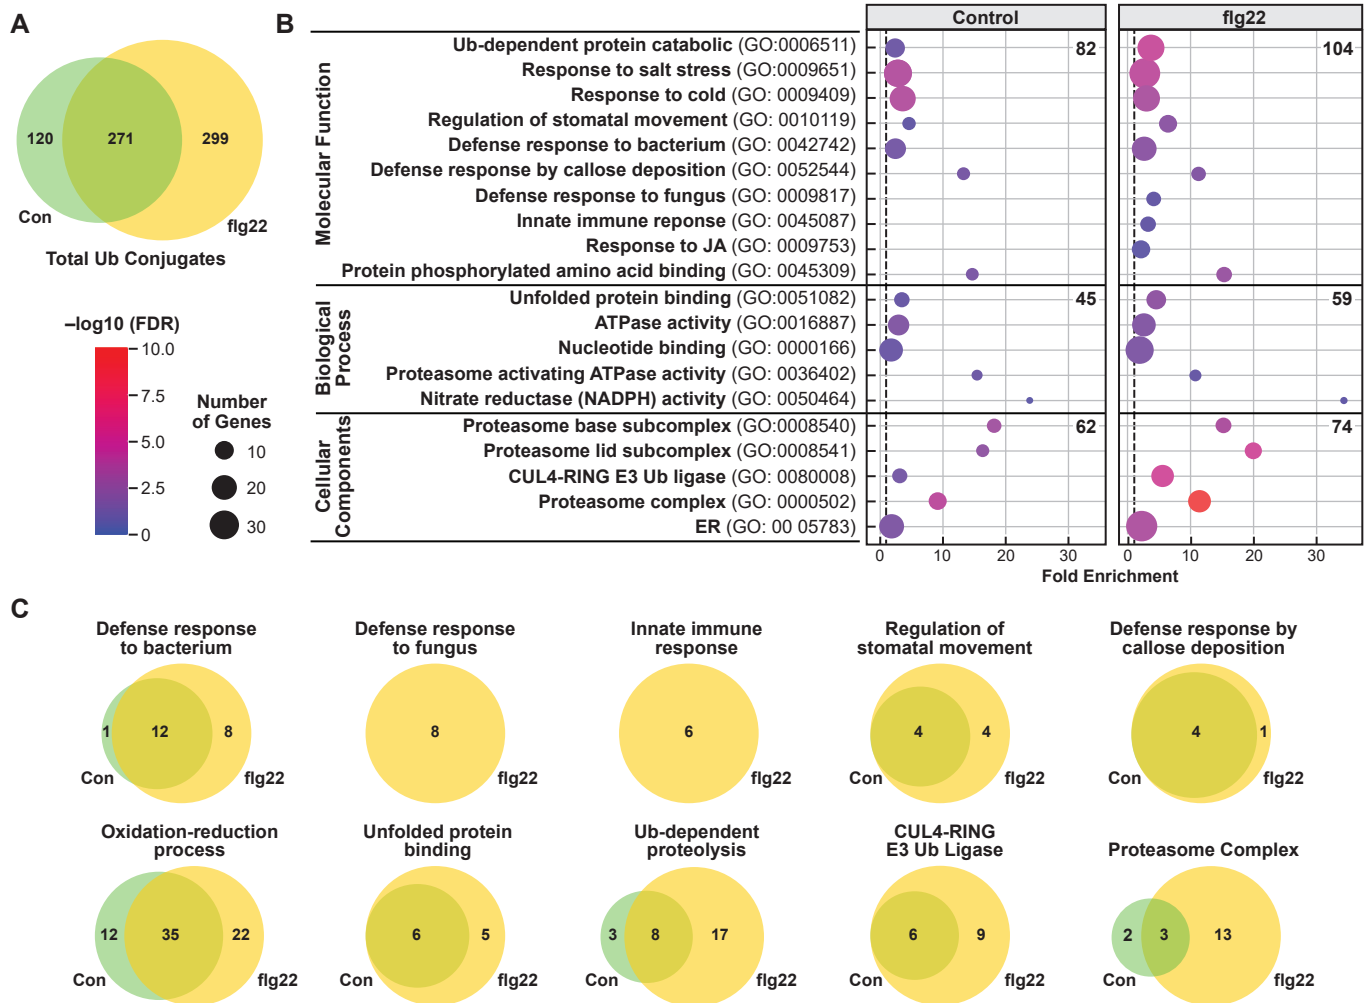

**Figure 2. Gene ontology (GO) analysis of flg22-treated and untreated ubiquitylomes.**

**A.** Venn diagram showing the overlap of the total ubiquitylated proteins isolated from plants with or without flg22 exposure.

**B.** Gene ontology (GO) enrichment of ubiquitylated proteins in control or flg22 treated ubiquitylomes. GO analysis in biological processes, molecular functions, and cellular components was performed using the DAVID Functional Annotation Tool (Huang da et al., 2009) and GO annotations from the TAIR GO database (<http://www.arabidopsis.org/>). The fold enrichment was calculated based on the frequency of proteins annotated to the term compared with their frequency in the total proteome. The dot size indicates the number of genes associated with each process and the dot color indicates the significance of the enrichment. FDR was based on the corrected p-values. The vertical grey dashed line represents a fold enrichment of 1. The total number of GO terms was listed under each GO domain (biological processes, molecular functions, and cellular components). The selected terms related to stress and the UPS are shown.

**C.** Venn diagram showing the overlaps of ubiquitylated proteins with or without flg22 in the selected categories. Proteins were categorized into functional groups based on the GO annotations; those related to defense responses and the UPS are shown.

A

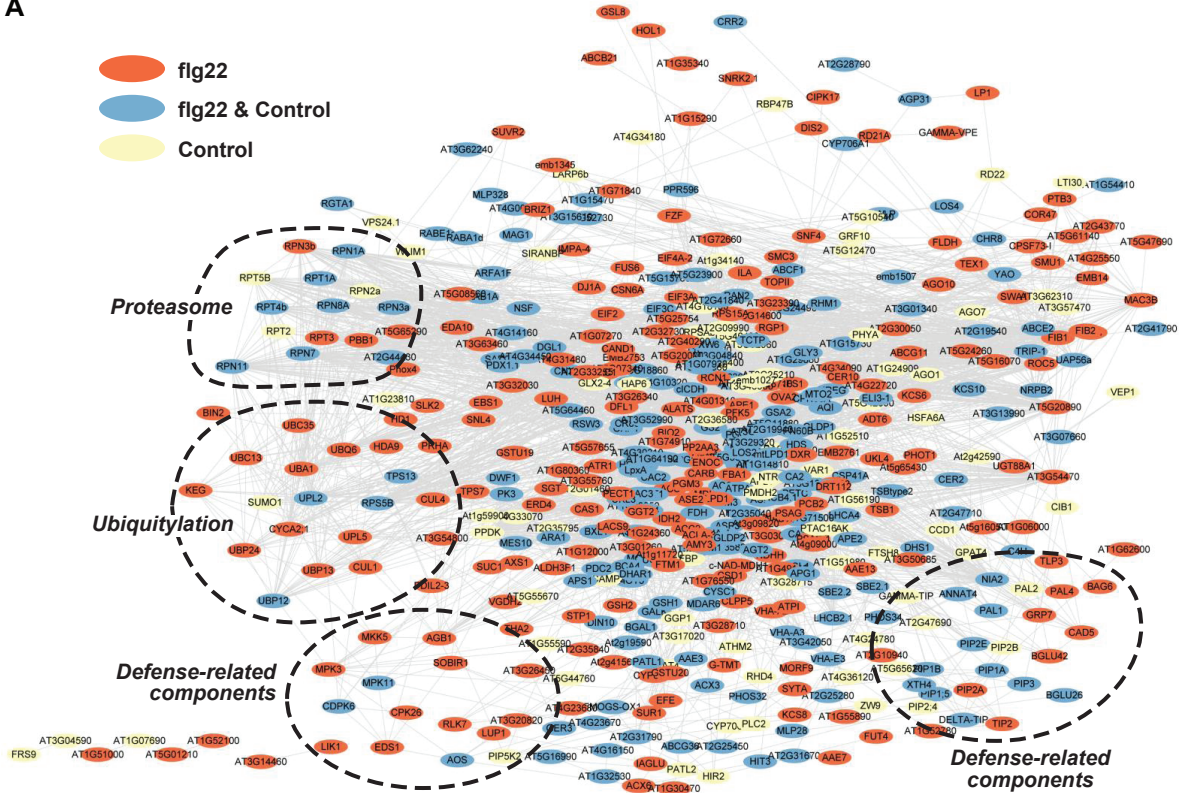

B

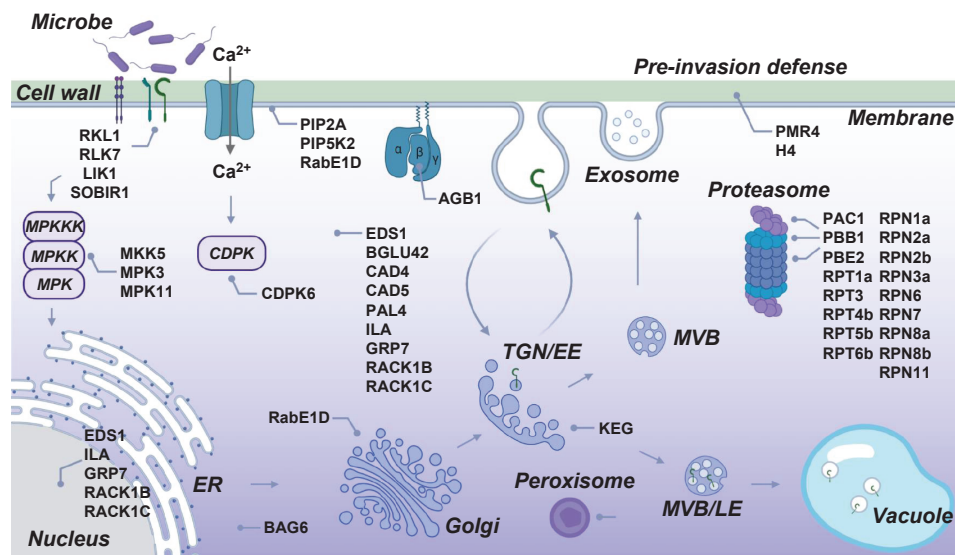

**Figure 3. Protein interaction network of ubiquitylated proteins identified from 6HIS-UBQ seedlings treated with or without flg22.**

**A.** Protein interaction networks were generated with the list of 391 (control) and 570 (flg22-treated) ubiquitylated proteins using the STRING database and visualized in Cytoscape. The node colors indicate proteins identified in control (yellow), flg22-treated (red), or both conditions (blue) of datasets. Clusters of the proteasome, ubiquitylation, and defense-related components are marked by dashed lines.

**B.** Map of proposed subcellular locations and functions of immunity-related proteins identified from the ubiquitylomes.

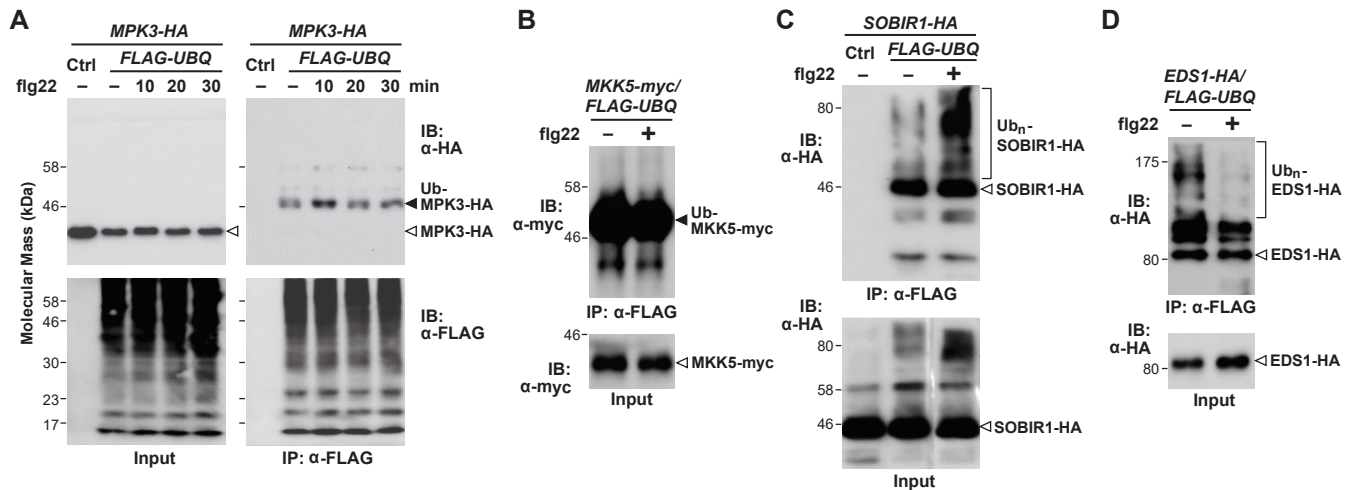

**Figure 4. In vivo confirmation that several candidates are ubiquitylated in Arabidopsis.**

Arabidopsis wild-type protoplasts were co-transfected with FLAG-tagged Ub (FLAG-UBQ) and HA- or myc-tagged substrate or a control vector (Ctrl) and incubated for 10 hr followed by treatment with 100 nM flg22 for the indicated. Protein extracts were immunoprecipitated with anti-FLAG agarose beads (IP:  $\alpha$ -FLAG) and the ubiquitylated proteins were immunoblotted with anti-HA or anti-myc antibodies (top left) or anti-FLAG antibodies (bottom left). The input controls were shown by an anti-HA/myc (top right) or anti-FLAG (bottom right) immunoblots.

**A.** Monoubiquitylation of MPK3 is enhanced upon flg22 treatment. Protoplasts were isolated at 0 to 30 min after flg22 exposure.

**B.** Polyubiquitylation of SOBIR1 in vivo is enhanced upon a 30 min treatment with flg22.

**C, D.** MKK5, and EDS1 were ubiquitylated in vivo following a 30-min treatment with flg22.

The above experiments were performed three times with similar results.

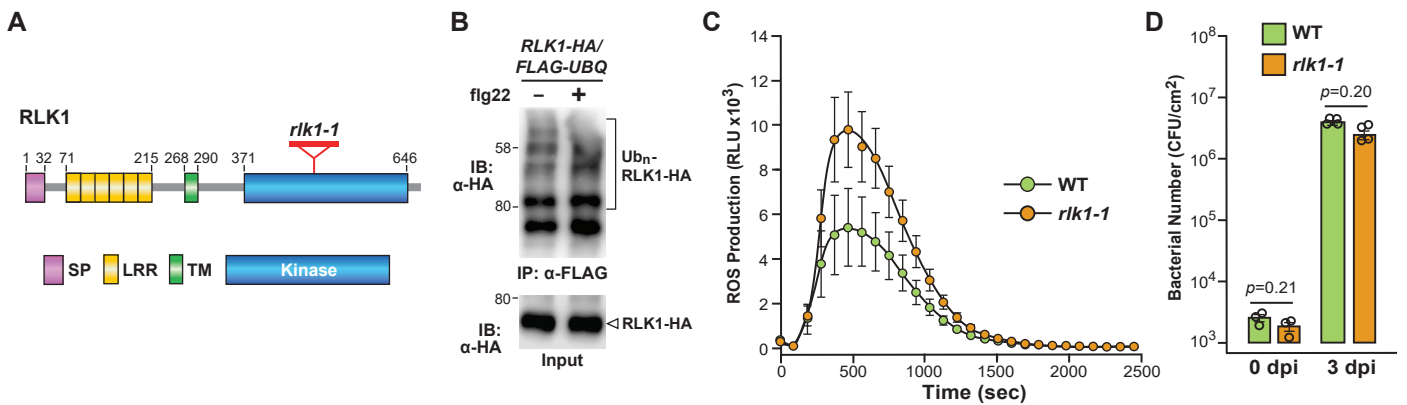

**Figure 5. RKL1 is ubiquitylated and involved in PTI responses.**

**A.** Diagram of the RKL1 protein. The signal peptide (SP), leucine-rich repeat (LRR), transmembrane (TM), and protein kinase (K) domains are shown. The amino acids demarcating each domain are shown.

**B.** In vivo ubiquitylation of RKL1 upon flg22 treatment. Protoplasts were co-transfected with FLAG-UBQ and HA-tagged RKL1 (RKL1-HA) or a control vector (Ctrl) and incubated for 10 hr followed by treatment with 100 nM flg22 for 30 min. Proteins were immunoprecipitated with anti-FLAG agarose beads (IP: α-FLAG) and the ubiquitylated proteins were detected by immunoblotting with anti-HA antibodies (top). The input controls were shown by an anti-HA immunoblot (bottom).

**C.** flg22-induced reactive oxygen species (ROS) burst is elevated in the *rkl1-1* mutants. Leaf disks of four-week-old soil-grown Arabidopsis WT or *rkl1-1* plants (SALK 099094) were treated with 100 nM flg22 or water as a control, and ROS production was monitored over time. The data are shown as mean ± s.e.m. (n = 16) of relative fluorescence units (RLU) overlaid on the dot plot.

**D.** *rkl1-1* mutants have elevated resistance against Pst DC3000. Leaf disks of four-week-old soil-grown Arabidopsis WT or *rkl1-1* plants were hand-infiltrated with Pst DC3000 at OD<sub>600</sub>=5×10<sup>-4</sup> CFU/ml, and bacterial growth was counted at 0 or 3 dpi. The data are shown as mean ± s.e.m. overlaid on dot plot (n = 3 for 0 dpi; n = 4 for 3 dpi). The experiments were performed three times with similar results.

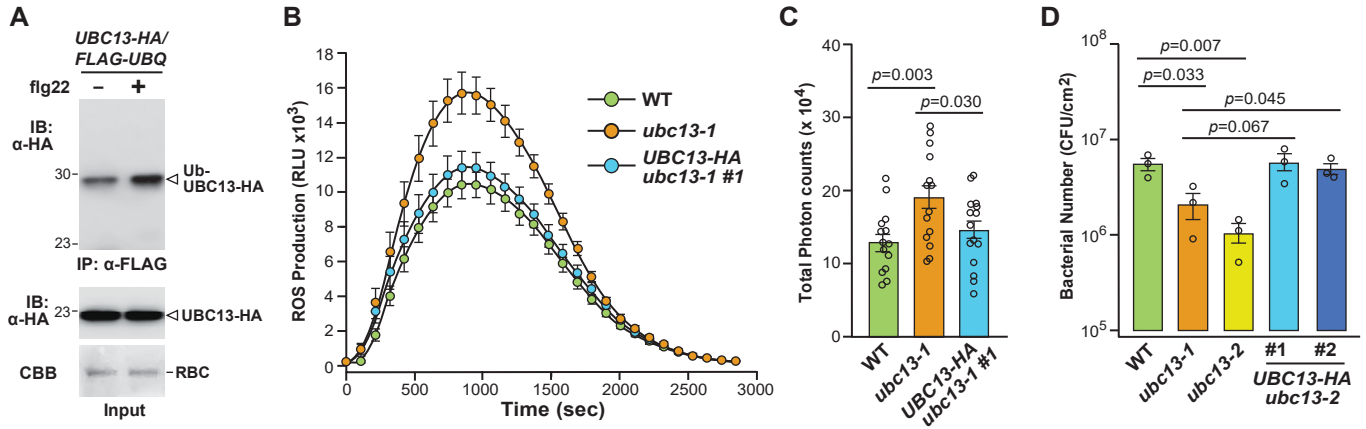

**Figure 6. UBC13 is ubiquitylated and negatively regulates PTI responses.**

**A.** In vivo ubiquitylation of UBC13 upon flg22 treatment. Protoplasts were co-transfected with FLAG-UBQ and HA-tagged UBC13 (UBC13-HA) and incubated for 10 hr followed by treatment with 100 nM flg22 for 30 min. Protein extracts were immunoprecipitated with anti-FLAG beads (IP: α-FLAG) and the ubiquitylated proteins were immunoblotted with anti-HA antibodies (top). The input control was shown by an anti-HA immunoblot (bottom).

**B, C.** UBC13 negatively regulates flg22-triggered ROS production. Leaf disks of four-week-old WT, *ubc13* (CS389049/*ubc13-1* & CS389056/*ubc13-2*), and plants harboring the p35S::UBC13-HA transgene in the *ubc13-2* mutant background were treated with 100 nM flg22. ROS production was monitored over time. The data are shown as mean ± s.e.m overlaid on dot plot (n = 16) of RLU. The total photon count was shown in (C).

**D.** *ubc13* mutants have elevated resistance against Pst DC3000. Leaf disks of four-week-old soil-grown WT, *ubc13-1*, *ubc13-2*, and p35S::UBC13-HA *ubc13-2* (Line 1 and 2) plants were hand-infiltrated with Pst DC3000 at OD600=5 × 10<sup>-4</sup> CFU/ml, and bacterial growth was counted at 3 dpi. The data are shown as mean ± s.e.m overlaid on the dot plot (n = 3). The experiments were performed three times with similar results.

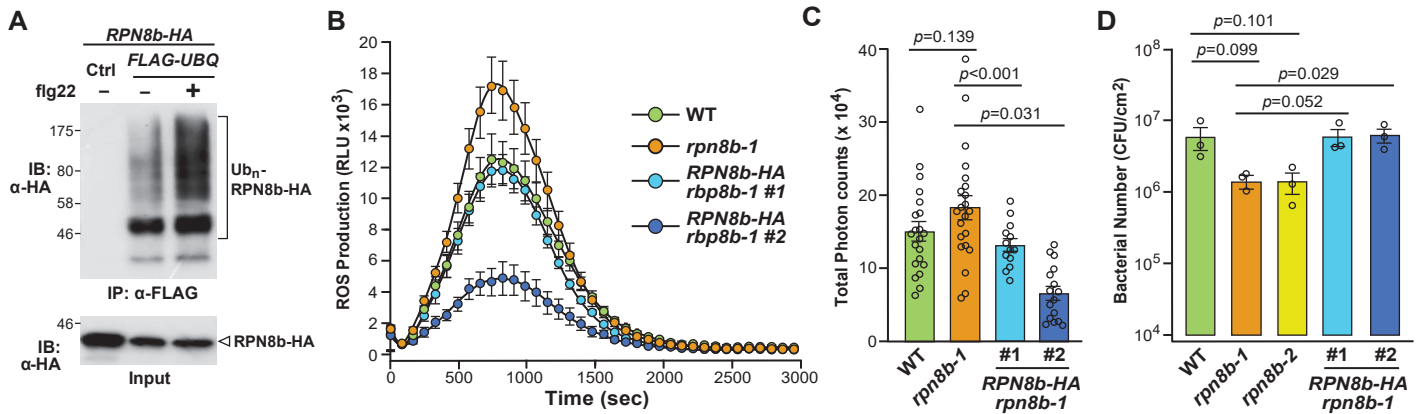

**Figure 7. RPN8b is ubiquitylated and negatively regulates PTI responses.**

**A.** in vivo ubiquitylation of RPN8b upon flg22 treatment. Protoplasts were co-transfected with FLAG-UBQ and HA-tagged RPN8b (RPN8b-HA) or a control vector (Ctrl) and incubated for 10 hr followed by treatment with 100 nM flg22 for 30 min. Protein extracts from protoplasts were immunoprecipitated with anti-FLAG beads (IP:  $\alpha$ -FLAG) and the ubiquitylated proteins were immunoblotted with anti-HA antibodies (top). The input control was shown by an anti-HA immunoblot (bottom).

**B, C.** RPN8b negatively regulates flg22-triggered ROS production. Leaf disks of four-week-old WT, *rpn8b-1* (SALK\_128568), *rpn8b-2* (SALK\_023568), and *rpn8b-1* plants harboring the p35S::RPN8b-HA transgene were treated with 100 nM flg22 or water as a control, and ROS production was monitored over time. The data are shown as mean  $\pm$  s.e.m overlaid on the dot plot ( $n \geq 13$ ) of RLU. The total photon count was shown in (C).

**D.** *rpn8b* mutants have elevated resistance against Pst DC3000. Leaf disks from four-week-old soil-grown WT, *rpn8b-1*, *rpn8b-2*, and 35S::RPN8b *rpn8b-1* plants were hand-infiltrated with Pst DC3000 at OD<sub>600</sub>= $5 \times 10^{-4}$  CFU/ml, and bacterial growth was counted at 3 dpi. The data are shown as mean  $\pm$  s.e.m overlaid on dot plot ( $n = 3$ ). The experiments were performed three times with similar results.

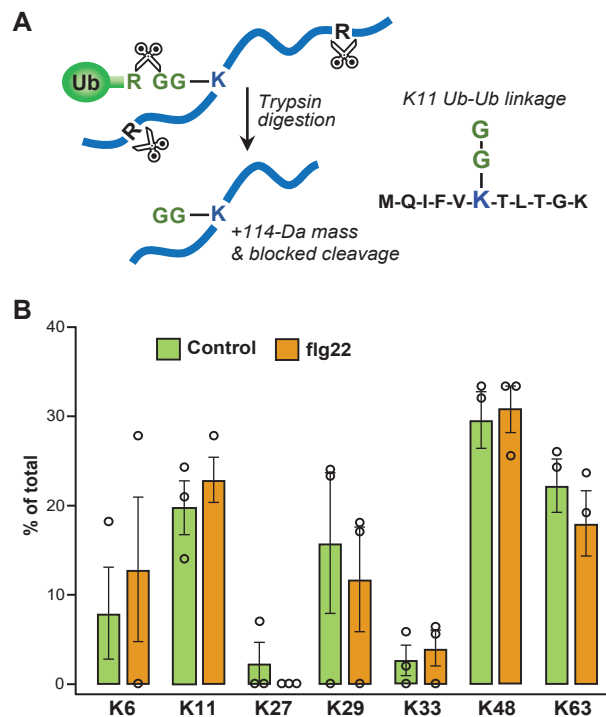

**Figure 8. MS/MS mapping of Ub-Ub linkages.**

**A.** Strategy for detecting ubiquitylation sites by MS/MS. After trypsin digestion, a diglycine remnant of Ub covalently appended to a lysine residue of a conjugated protein is detected by an increased mass of 114 kDa for the lysine residue, along with protection from trypsin cleavage after that residue. Amino acids are denoted by single-letter code.

**B.** The distribution of Ub-Ub linkages across the seven Ub lysines based on MS analysis from Arabidopsis transgenic plants carrying 6HIS-UBQ seedlings treated with or without 100 nM flg22. Percentage of Ub footprints at each site were obtained from PSM counts of diagnostic footprint peptides.

## Parsed Citations

Adams, E.H.G., and Spoel, S.H. (2018). The ubiquitin-proteasome system as a transcriptional regulator of plant immunity. *J Exp Bot* 69, 4529-4537.

Google Scholar: [Author Only](#) [Title Only](#) [Author and Title](#)

Aguilar-Hernandez, V., Kim, D.Y., Stankey, R.J., Scalf, M., Smith, L.M., and Vierstra, R.D. (2017). Mass Spectrometric Analyses Reveal a Central Role for Ubiquitylation in Remodeling the Arabidopsis Proteome during Photomorphogenesis. *Mol Plant* 10, 846-865.

Google Scholar: [Author Only](#) [Title Only](#) [Author and Title](#)

Albert, I., Böhm, H., Albert, M., Feiler, C.E., Imkampe, J., Wallmeroth, N., Brancato, C., Raaymakers, T.M., Oome, S., and Zhang, H. (2015). An RLP23-SOBIR1-BAK1 complex mediates NLP-triggered immunity. *Nature Plants* 1, 1-9.

Google Scholar: [Author Only](#) [Title Only](#) [Author and Title](#)

Alonso, J.M., Stepanova, A.N., Leisse, T.J., Kim, C.J., Chen, H., Shinn, P., Stevenson, D.K., Zimmerman, J., Barajas, P., Cheuk, R., et al. (2003). Genome-wide insertional mutagenesis of Arabidopsis thaliana. *Science* 301, 653-657.

Google Scholar: [Author Only](#) [Title Only](#) [Author and Title](#)

Asai, T., Tena, G., Plotnikova, J., Willmann, M.R., Chiu, W.L., Gomez-Gomez, L., Boller, T., Ausubel, F.M., and Sheen, J. (2002). MAP kinase signalling cascade in Arabidopsis innate immunity. *Nature* 415, 977-983.

Google Scholar: [Author Only](#) [Title Only](#) [Author and Title](#)

Bakker, E.G., Toomajian, C., Kreitman, M., and Bergelson, J. (2006). A genome-wide survey of R gene polymorphisms in Arabidopsis. *Plant Cell* 18, 1803-1818.

Google Scholar: [Author Only](#) [Title Only](#) [Author and Title](#)

Bellati, J., Champeyroux, C., Hem, S., Rofidal, V., Krouk, G., Maurel, C., and Santoni, V. (2016). Novel Aquaporin Regulatory Mechanisms Revealed by Interactomics. *Mol Cell Proteomics* 15, 3473-3487.

Google Scholar: [Author Only](#) [Title Only](#) [Author and Title](#)

Bennett, E.J., Shaler, T.A., Woodman, B., Ryu, K.Y., Zaitseva, T.S., Becker, C.H., Bates, G.P., Schulman, H., and Kopito, R.R. (2007). Global changes to the ubiquitin system in Huntington's disease. *Nature* 448, 704-708.

Google Scholar: [Author Only](#) [Title Only](#) [Author and Title](#)

Bethke, G., Pecher, P., Eschen-Lippold, L., Tsuda, K., Katagiri, F., Glazebrook, J., Scheel, D., and Lee, J. (2012). Activation of the Arabidopsis thaliana mitogen-activated protein kinase MPK11 by the flagellin-derived elicitor peptide, flg22. *Mol Plant Microbe Interact* 25, 471-480.

Google Scholar: [Author Only](#) [Title Only](#) [Author and Title](#)

Böhm, H., Albert, I., Fan, L., Reinhard, A., and Nürnberger, T. J.C.o.i.p.b. (2014). Immune receptor complexes at the plant cell surface. *20*, 47-54.

Google Scholar: [Author Only](#) [Title Only](#) [Author and Title](#)

Bonnot, T., Gillard, M., and Nagel, D. (2019). A Simple Protocol for Informative Visualization of Enriched Gene Ontology Terms. *Bio-Protocol* 9.

Google Scholar: [Author Only](#) [Title Only](#) [Author and Title](#)

Book, A.J., Gladman, N.P., Lee, S.S., Scalf, M., Smith, L.M., and Vierstra, R.D. (2010). Affinity purification of the Arabidopsis 26 S proteasome reveals a diverse array of plant proteolytic complexes. *The Journal of biological chemistry* 285, 25554-25569.

Google Scholar: [Author Only](#) [Title Only](#) [Author and Title](#)

Chen, X.L., Xie, X., Wu, L., Liu, C., Zeng, L., Zhou, X., Luo, F., Wang, G.L., and Liu, W. (2018). Proteomic Analysis of Ubiquitinated Proteins in Rice (*Oryza sativa*) After Treatment With Pathogen-Associated Molecular Pattern (PAMP) Elicitors. *Front Plant Sci* 9, 1064.

Google Scholar: [Author Only](#) [Title Only](#) [Author and Title](#)

Chen, Y., Li, F., Tian, L., Huang, M., Deng, R., Li, X., Chen, W., Wu, P., Li, M., and Jiang, H. (2017). The phenylalanine ammonia lyase gene LJPAL1 is involved in plant defense responses to pathogens and plays diverse roles in Lotus japonicus-rhizobium symbioses. *Molecular Plant-Microbe Interactions* 30, 739-753.

Google Scholar: [Author Only](#) [Title Only](#) [Author and Title](#)

Cheng, Y.T., and Li, X. (2012). Ubiquitination in NB-LRR-mediated immunity. *Curr Opin Plant Biol* 15, 392-399.

Google Scholar: [Author Only](#) [Title Only](#) [Author and Title](#)

Cheng, Y.T., Li, Y.Z., Huang, S.A., Huang, Y., Dong, X.N., Zhang, Y.L., and Li, X. (2011). Stability of plant immune-receptor resistance proteins is controlled by SKP1-CULLIN1-F-box (SCF)-mediated protein degradation. *P Natl Acad Sci USA* 108, 14694-14699.

Google Scholar: [Author Only](#) [Title Only](#) [Author and Title](#)

Cheng, Z., Li, J.F., Niu, Y., Zhang, X.C., Woody, O.Z., Xiong, Y., Djonovic, S., Millet, Y., Bush, J., McConkey, B.J., et al. (2015). Pathogen-secreted proteases activate a novel plant immune pathway. *Nature* 521, 213-216.

Google Scholar: [Author Only](#) [Title Only](#) [Author and Title](#)

Clay, N.K., Adio, A.M., Denoux, C., Jander, G., and Ausubel, F.M. (2009). Glucosinolate metabolites required for an Arabidopsis innate immune response. *Science* 323, 95-101.



Google Scholar: [Author Only](#) [Title Only](#) [Author and Title](#)

**Collins, N.C., Thordal-Christensen, H., Lipka, V., Bau, S., Kombrink, E., Qiu, J.L., Huckelhoven, R., Stein, M., Freialdenhoven, A., Somerville, S.C., et al. (2003). SNARE-protein-mediated disease resistance at the plant cell wall. *Nature* 425, 973-977.**

Google Scholar: [Author Only](#) [Title Only](#) [Author and Title](#)

**Couto, D., and Zipfel, C. (2016). Regulation of pattern recognition receptor signalling in plants. *Nat Rev Immunol* 16, 537-552.**

Google Scholar: [Author Only](#) [Title Only](#) [Author and Title](#)

**Cui, H., Tsuda, K., and Parker, J.E. (2015). Effector-triggered immunity: from pathogen perception to robust defense. *Annual review of plant biology* 66, 487-511.**

Google Scholar: [Author Only](#) [Title Only](#) [Author and Title](#)

**DIELEN, A.S., Badaoui, S., Candresse, T., and GERMAN-RETANA, S. (2010). The ubiquitin/26S proteasome system in plant-pathogen interactions: a never-ending hide-and-seek game. *Molecular plant pathology* 11, 293-308.**

Google Scholar: [Author Only](#) [Title Only](#) [Author and Title](#)

**Eschen-Lippold, L., Bethke, G., Palm-Forster, M.A., Pecher, P., Bauer, N., Glazebrook, J., Scheel, D., and Lee, J. (2012). MPK11-a fourth elicitor-responsive mitogen-activated protein kinase in *Arabidopsis thaliana*. *Plant signaling & behavior* 7, 1203-1205.**

Google Scholar: [Author Only](#) [Title Only](#) [Author and Title](#)

**Ewan, R., Pangestuti, R., Thornber, S., Craig, A., Carr, C., O'Donnell, L., Zhang, C., and Sadanandom, A. (2011). Deubiquitinating enzymes AtUBP12 and AtUBP13 and their tobacco homologue NtUBP12 are negative regulators of plant immunity. *New Phytol* 191, 92-106.**

Google Scholar: [Author Only](#) [Title Only](#) [Author and Title](#)

**Finley, D. (2009). Recognition and processing of ubiquitin-protein conjugates by the proteasome. *Annual review of biochemistry* 78, 477-513.**

Google Scholar: [Author Only](#) [Title Only](#) [Author and Title](#)

**Fuchs, R., Kopsischke, M., Klapprodt, C., Hause, G., Meyer, A.J., Schwarzlander, M., Fricker, M.D., and Lipka, V. (2016). Immobilized Subpopulations of Leaf Epidermal Mitochondria Mediate PENETRATION2-Dependent Pathogen Entry Control in *Arabidopsis*. *Plant Cell* 28, 130-145.**

Google Scholar: [Author Only](#) [Title Only](#) [Author and Title](#)

**Furlan, G., Nakagami, H., Eschen-Lippold, L., Jiang, X., Majovsky, P., Kowarschik, K., Hoehenwarter, W., Lee, J., and Trujillo, M. (2017). Changes in PUB22 Ubiquitination Modes Triggered by MITOGEN-ACTIVATED PROTEIN KINASE3 Dampen the Immune Response. *The Plant Cell* 29, 726-745.**

Google Scholar: [Author Only](#) [Title Only](#) [Author and Title](#)

**Furniss, J.J., Grey, H., Wang, Z., Nomoto, M., Jackson, L., Tada, Y., and Spoel, S.H. (2018a). Proteasome-associated HECT-type ubiquitin ligase activity is required for plant immunity. *PLoS Pathog* 14, e1007447.**

Google Scholar: [Author Only](#) [Title Only](#) [Author and Title](#)

**Furniss, J.J., Grey, H., Wang, Z., Nomoto, M., Jackson, L., Tada, Y., and Spoel, S.H. (2018b). Proteasome-associated HECT-type ubiquitin ligase activity is required for plant immunity. *PLoS pathogens* 14, e1007447.**

Google Scholar: [Author Only](#) [Title Only](#) [Author and Title](#)

**Furniss, J.J., Grey, H., Wang, Z., Nomoto, M., Jackson, L., Tada, Y., and Spoel, S.H.J.P.p. (2018c). Proteasome-associated HECT-type ubiquitin ligase activity is required for plant immunity. 14, e1007447.**

Google Scholar: [Author Only](#) [Title Only](#) [Author and Title](#)

**Goritschnig, S., Zhang, Y., and Li, X. (2007). The ubiquitin pathway is required for innate immunity in *Arabidopsis*. *The Plant Journal* 49, 540-551.**

Google Scholar: [Author Only](#) [Title Only](#) [Author and Title](#)

**Gou, M., Shi, Z., Zhu, Y., Bao, Z., Wang, G., and Hua, J. (2012). The F-box protein CPR1/CPR30 negatively regulates R protein SNC1 accumulation. *Plant J* 69, 411-420.**

Google Scholar: [Author Only](#) [Title Only](#) [Author and Title](#)

**Gou, M., Su, N., Zheng, J., Huai, J., Wu, G., Zhao, J., He, J., Tang, D., Yang, S., and Wang, G.J.T.P.J. (2009). An F-box gene, CPR30, functions as a negative regulator of the defense response in *Arabidopsis*. 60, 757-770.**

Google Scholar: [Author Only](#) [Title Only](#) [Author and Title](#)

**Gu, Y., and Innes, R.W. (2011). The KEEP ON GOING protein of *Arabidopsis* recruits the ENHANCED DISEASE RESISTANCE1 protein to trans-Golgi network/early endosome vesicles. *Plant Physiol* 155, 1827-1838.**

Google Scholar: [Author Only](#) [Title Only](#) [Author and Title](#)

**Gu, Y., Zavaliev, R., and Dong, X.J.M.p. (2017). Membrane trafficking in plant immunity. 10, 1026-1034.**

Google Scholar: [Author Only](#) [Title Only](#) [Author and Title](#)

**Guerra, D.D., and Callis, J. (2012). Ubiquitin on the move: the ubiquitin modification system plays diverse roles in the regulation of endoplasmic reticulum- and plasma membrane-localized proteins. *Plant Physiol* 160, 56-64.**

Google Scholar: [Author Only](#) [Title Only](#) [Author and Title](#)

- Heidrich, K., Wirthmueller, L., Tasset, C., Pouzet, C., Deslandes, L., and Parker, J.E. (2011). Arabidopsis EDS1 connects pathogen effector recognition to cell compartment-specific immune responses. *Science* 334, 1401-1404.  
Google Scholar: [Author Only Title Only Author and Title](#)
- Hjerpe, R., Aillet, F., Lopitz-Otsoa, F., Lang, V., England, P., and Rodriguez, M.S. (2009). Efficient protection and isolation of ubiquitylated proteins using tandem ubiquitin-binding entities. *EMBO reports* 10, 1250-1258.  
Google Scholar: [Author Only Title Only Author and Title](#)
- Hou, S., Wang, X., Chen, D., Yang, X., Wang, M., Turra, D., Di Pietro, A., and Zhang, W. (2014). The secreted peptide PIP1 amplifies immunity through receptor-like kinase 7. *PLoS pathogens* 10, e1004331.  
Google Scholar: [Author Only Title Only Author and Title](#)
- Hou, X., and Gao, Y. (2017). Investigation on the Interaction of Pseudomonas syringae Effector AvrPto with AtRabE1d GTPase. *Protein and peptide letters* 24, 661-667.  
Google Scholar: [Author Only Title Only Author and Title](#)
- Hu, H.B., and Sun, S.C. (2016). Ubiquitin signaling in immune responses. *Cell research* 26, 457-483.  
Google Scholar: [Author Only Title Only Author and Title](#)
- Huang da, W., Sherman, B.T., and Lempicki, R.A. (2009). Systematic and integrative analysis of large gene lists using DAVID bioinformatics resources. *Nature protocols* 4, 44-57.  
Google Scholar: [Author Only Title Only Author and Title](#)
- Huang, J., Gu, M., Lai, Z., Fan, B., Shi, K., Zhou, Y.H., Yu, J.Q., and Chen, Z. (2010). Functional analysis of the Arabidopsis PAL gene family in plant growth, development, and response to environmental stress. *Plant Physiol* 153, 1526-1538.  
Google Scholar: [Author Only Title Only Author and Title](#)
- Huang, S., Chen, X., Zhong, X., Li, M., Ao, K., Huang, J., and Li, X. (2016). Plant TRAF Proteins Regulate NLR Immune Receptor Turnover. *Cell Host Microbe* 20, 271.  
Google Scholar: [Author Only Title Only Author and Title](#)
- Isono, E., and Nagel, M.K. (2014). Deubiquitylating enzymes and their emerging role in plant biology. *Front Plant Sci* 5, 56.  
Google Scholar: [Author Only Title Only Author and Title](#)
- Iwai, K., and Tokunaga, F. (2009). Linear polyubiquitination: a new regulator of NF-kappaB activation. *EMBO reports* 10, 706-713.  
Google Scholar: [Author Only Title Only Author and Title](#)
- Jacobs, A.K., Lipka, V., Burton, R.A., Panstruga, R., Strizhov, N., Schulze-Lefert, P., and Fincher, G.B. (2003). An Arabidopsis callose synthase, GSL5, is required for wound and papillary callose formation. *The Plant Cell* 15, 2503-2513.  
Google Scholar: [Author Only Title Only Author and Title](#)
- Kim, D.Y., Scalf, M., Smith, L.M., and Vierstra, R.D. (2013). Advanced proteomic analyses yield a deep catalog of ubiquitylation targets in Arabidopsis. *The Plant cell* 25, 1523-1540.  
Google Scholar: [Author Only Title Only Author and Title](#)
- Kim, S.J., Kim, M.R., Bedgar, D.L., Moinuddin, S.G., Cardenas, C.L., Davin, L.B., Kang, C., and Lewis, N.G. (2004). Functional reclassification of the putative cinnamyl alcohol dehydrogenase multigene family in Arabidopsis. *Proc Natl Acad Sci U S A* 101, 1455-1460.  
Google Scholar: [Author Only Title Only Author and Title](#)
- Kleinboelting, N., Huet, G., Kloetgen, A., Viehoveer, P., and Weisshaar, B. (2012). GABI-Kat SimpleSearch: new features of the Arabidopsis thaliana T-DNA mutant database. *Nucleic Acids Res* 40, D1211-1215.  
Google Scholar: [Author Only Title Only Author and Title](#)
- Komander, D., and Rape, M. (2012). The ubiquitin code. *Annu Rev Biochem* 81, 203-229.  
Google Scholar: [Author Only Title Only Author and Title](#)
- Lachaud, C., Prigent, E., Thuleau, P., Grat, S., Da Silva, D., Brière, C., Mazars, C., and Cotelle, V. (2013). 14-3-3-Regulated Ca<sup>2+</sup>-dependent protein kinase CPK3 is required for sphingolipid-induced cell death in Arabidopsis. *Cell Death & Differentiation* 20, 209-217.  
Google Scholar: [Author Only Title Only Author and Title](#)
- Le, M.H., Cao, Y., Zhang, X.C., and Stacey, G. (2014). LIK1, a CERK1-interacting kinase, regulates plant immune responses in Arabidopsis. *PLoS One* 9, e102245.  
Google Scholar: [Author Only Title Only Author and Title](#)
- Lee, B.-J., Kwon, S.J., Kim, S.-K., Kim, K.-J., Park, C.-J., Kim, Y.-J., Park, O.K., and Paek, K.-H. (2006). Functional study of hot pepper 26S proteasome subunit RPN7 induced by Tobacco mosaic virus from nuclear proteome analysis. *Biochemical and biophysical research communications* 351, 405-411.  
Google Scholar: [Author Only Title Only Author and Title](#)
- Li, L., Habring, A., Wang, K., and Weigel, D. (2020). Atypical Resistance Protein RPW8/HR Triggers Oligomerization of the NLR Immune Receptor RPP7 and Autoimmunity. *Cell Host Microbe* 27, 405-417 e406.

Google Scholar: [Author Only](#) [Title Only](#) [Author and Title](#)

Li, Y., Kabbage, M., Liu, W., and Dickman, M.B. (2016). Aspartyl protease-mediated cleavage of BAG6 is necessary for autophagy and fungal resistance in plants. *The Plant Cell* 28, 233-247.

Google Scholar: [Author Only](#) [Title Only](#) [Author and Title](#)

Liang, X., Ding, P., Lian, K., Wang, J., Ma, M., Li, L., Li, L., Li, M., Zhang, X., Chen, S., et al. (2016). Arabidopsis heterotrimeric G proteins regulate immunity by directly coupling to the FLS2 receptor. *Elife* 5, e13568.

Google Scholar: [Author Only](#) [Title Only](#) [Author and Title](#)

Liao, D., Cao, Y., Sun, X., Espinoza, C., Nguyen, C.T., Liang, Y., and Stacey, G. (2017). Arabidopsis E3 ubiquitin ligase PLANT U-BOX13 (PUB13) regulates chitin receptor LYSIN MOTIF RECEPTOR KINASE5 (LYK5) protein abundance. *The New phytologist* 214, 1646-1656.

Google Scholar: [Author Only](#) [Title Only](#) [Author and Title](#)

Liebrand, T.W., van den Burg, H.A., and Joosten, M.H. (2014). Two for all: receptor-associated kinases SOBIR1 and BAK1. *Trends in plant science* 19, 123-132.

Google Scholar: [Author Only](#) [Title Only](#) [Author and Title](#)

Liu, J., Ding, P., Sun, T., Nitta, Y., Dong, O., Huang, X., Yang, W., Li, X., Botella, J.R., and Zhang, Y. (2013). Heterotrimeric G proteins serve as a converging point in plant defense signaling activated by multiple receptor-like kinases. *Plant physiology* 161, 2146-2158.

Google Scholar: [Author Only](#) [Title Only](#) [Author and Title](#)

Liu, J., Li, H., Miao, M., Tang, X., Giovannoni, J., Xiao, F., and Liu, Y. (2012a). The tomato UV-damaged DNA-binding protein-1 (DDB1) is implicated in pathogenesis-related (PR) gene expression and resistance to *Agrobacterium tumefaciens*. *Molecular plant pathology* 13, 123-134.

Google Scholar: [Author Only](#) [Title Only](#) [Author and Title](#)

Liu, J., Li, H., Miao, M., Tang, X., Giovannoni, J., Xiao, F., and Liu, Y. (2012b). The tomato UV-damaged DNA-binding protein-1 (DDB1) is implicated in pathogenesis-related (PR) gene expression and resistance to *Agrobacterium tumefaciens*. *13*, 123-134.

Google Scholar: [Author Only](#) [Title Only](#) [Author and Title](#)

Lu, D., Lin, W., Gao, X., Wu, S., Cheng, C., Avila, J., Heese, A., Devarenne, T.P., He, P., and Shan, L. (2011). Direct ubiquitination of pattern recognition receptor FLS2 attenuates plant innate immunity. *Science* 332, 1439-1442.

Google Scholar: [Author Only](#) [Title Only](#) [Author and Title](#)

Ma, X., Claus, L.A.N., Leslie, M.E., Tao, K., Wu, Z., Liu, J., Yu, X., Li, B., Zhou, J., Savatin, D.V., et al. (2020). Ligand-induced monoubiquitination of BIK1 regulates plant immunity. *Nature* 581, 199-203.

Google Scholar: [Author Only](#) [Title Only](#) [Author and Title](#)

Maor, R., Jones, A., Nuhse, T.S., Studholme, D.J., Peck, S.C., and Shirasu, K. (2007). Multidimensional protein identification technology (MudPIT) analysis of ubiquitinated proteins in plants. *Mol Cell Proteomics* 6, 601-610.

Google Scholar: [Author Only](#) [Title Only](#) [Author and Title](#)

Marino, D., Peeters, N., and Rivas, S. (2012). Ubiquitination during plant immune signaling. *Plant physiology* 160, 15-27.

Google Scholar: [Author Only](#) [Title Only](#) [Author and Title](#)

Marshall, R.S., Li, F., Gemperline, D.C., Book, A.J., and Vierstra, R.D. (2015). Autophagic Degradation of the 26S Proteasome Is Mediated by the Dual ATG8/Ubiquitin Receptor RPN10 in Arabidopsis. *Molecular cell* 58, 1053-1066.

Google Scholar: [Author Only](#) [Title Only](#) [Author and Title](#)

Marshall, R.S., and Vierstra, R.D. (2018). Autophagy: The Master of Bulk and Selective Recycling. *Annual review of plant biology* 69, 173-208.

Google Scholar: [Author Only](#) [Title Only](#) [Author and Title](#)

Meng, X., and Zhang, S. (2013). MAPK cascades in plant disease resistance signaling. *Annual review of phytopathology* 51, 245-266.

Google Scholar: [Author Only](#) [Title Only](#) [Author and Title](#)

Meyer, D., Pajonk, S., Micali, C., O'Connell, R., and Schulze-Lefert, P.J.T.P.J. (2009). Extracellular transport and integration of plant secretory proteins into pathogen-induced cell wall compartments. *57*, 986-999.

Google Scholar: [Author Only](#) [Title Only](#) [Author and Title](#)

Miao, Y., and Zentgraf, U. (2010). A HECT E3 ubiquitin ligase negatively regulates Arabidopsis leaf senescence through degradation of the transcription factor WRKY53. *The Plant Journal* 63, 179-188.

Google Scholar: [Author Only](#) [Title Only](#) [Author and Title](#)

Monaghan, J., and Li, X. (2010). The HEAT repeat protein ILITYHIA is required for plant immunity. *Plant and cell physiology* 51, 742-753.

Google Scholar: [Author Only](#) [Title Only](#) [Author and Title](#)

Monaghan, J., Li, X.J.P., and physiology, c. (2010). The HEAT repeat protein ILITYHIA is required for plant immunity. *51*, 742-753.

Google Scholar: [Author Only](#) [Title Only](#) [Author and Title](#)

Monaghan, J., Xu, F., Gao, M., Zhao, Q., Palma, K., Long, C., Chen, S., Zhang, Y., and Li, X. (2009). Two Prp19-like U-box proteins in the MOS4-associated complex play redundant roles in plant innate immunity. *PLoS Pathogens* 5.

Google Scholar: [Author Only](#) [Title Only](#) [Author and Title](#)

- Mondragon-Palomino, M., Stam, R., John-Arputharaj, A., and Dresselhaus, T. (2017). Diversification of defensins and NLRs in *Arabidopsis* species by different evolutionary mechanisms. *BMC Evol Biol* 17, 255.  
Google Scholar: [Author Only Title Only Author and Title](#)
- Mural, R.V., Liu, Y., Rosebrock, T.R., Brady, J.J., Hamera, S., Connor, R.A., Martin, G.B., and Zeng, L. (2013). The tomato Fni3 lysine-63-specific ubiquitin-conjugating enzyme and suv ubiquitin E2 variant positively regulate plant immunity. *Plant Cell* 25, 3615-3631.  
Google Scholar: [Author Only Title Only Author and Title](#)
- Murata, S., Yashiroda, H., and Tanaka, K. (2009). Molecular mechanisms of proteasome assembly. *Nature reviews Molecular cell biology* 10, 104-115.  
Google Scholar: [Author Only Title Only Author and Title](#)
- Nakashima, A., Chen, L., Thao, N.P., Fujiwara, M., Wong, H.L., Kuwano, M., Umemura, K., Shirasu, K., Kawasaki, T., and Shimamoto, K. (2008). RACK1 functions in rice innate immunity by interacting with the Rac1 immune complex. *Plant Cell* 20, 2265-2279.  
Google Scholar: [Author Only Title Only Author and Title](#)
- Nicaise, V., Joe, A., Jeong, B., Korneli, C., Boutrot, F., Wested, I., Staiger, D., Alfano, J., and Zipfel, C. (2013). *Pseudomonas* HopU1 affects interaction of plant immune receptor mRNAs to the RNA-binding protein GRP7. *EMBO J* 32, 701-712.  
Google Scholar: [Author Only Title Only Author and Title](#)
- Okumoto, K., Misono, S., Miyata, N., Matsumoto, Y., Mukai, S., and Fujiki, Y. (2011). Cysteine ubiquitination of PTS1 receptor Pex5p regulates Pex5p recycling. *Traffic* 12, 1067-1083.  
Google Scholar: [Author Only Title Only Author and Title](#)
- Ordureau, A., Paulo, J.A., Zhang, J., An, H., Swatek, K.N., Cannon, J.R., Wan, Q., Komander, D., and Harper, J.W. (2020). Global Landscape and Dynamics of Parkin and USP30-Dependent Ubiquitylomes in iNeurons during Mitophagic Signaling. *Molecular cell* 77, 1124-1142 e1110.  
Google Scholar: [Author Only Title Only Author and Title](#)
- Paez Valencia, J., Goodman, K., and Otegui, M.S. (2016). Endocytosis and Endosomal Trafficking in Plants. *Annual review of plant biology* 67, 309-335.  
Google Scholar: [Author Only Title Only Author and Title](#)
- Palm, D., Streit, D., Shanmugam, T., Weis, B.L., Ruprecht, M., Simm, S., and Schleiff, E. (2019). Plant-specific ribosome biogenesis factors in *Arabidopsis thaliana* with essential function in rRNA processing. *Nucleic Acids Res* 47, 1880-1895.  
Google Scholar: [Author Only Title Only Author and Title](#)
- Parker, J.E., Holub, E.B., Frost, L.N., Falk, A., Gunn, N.D., and Daniels, M.J. (1996). Characterization of eds1, a mutation in *Arabidopsis* suppressing resistance to *Peronospora parasitica* specified by several different RPP genes. *The Plant Cell* 8, 2033-2046.  
Google Scholar: [Author Only Title Only Author and Title](#)
- Pastorczyk, M., and Bednarek, P. (2016). The function of glucosinolates and related metabolites in plant innate immunity. In *Advances in Botanical Research* (Elsevier), pp. 171-198.  
Google Scholar: [Author Only Title Only Author and Title](#)
- Pecher, P., Eschen-Lippold, L., Herklotz, S., Kuhle, K., Naumann, K., Bethke, G., Uhrig, J., Weyhe, M., Scheel, D., and Lee, J. (2014). The *Arabidopsis thaliana* mitogen-activated protein kinases MPK 3 and MPK 6 target a subclass of 'VQ-motif'-containing proteins to regulate immune responses. *New Phytologist* 203, 592-606.  
Google Scholar: [Author Only Title Only Author and Title](#)
- Peng, J., Schwartz, D., Elias, J.E., Thoreen, C.C., Cheng, D., Marsischky, G., Roelofs, J., Finley, D., and Gygi, S.P. (2003). A proteomics approach to understanding protein ubiquitination. *Nat Biotechnol* 21, 921-926.  
Google Scholar: [Author Only Title Only Author and Title](#)
- Perraki, A., Gronnier, J., Gouguet, P., Boudsocq, M., Deroubaix, A-F., Simon, V., German-Retana, S., Zipfel, C., Bayer, E., and Mongrand, S. (2017). The plant calcium-dependent protein kinase CPK3 phosphorylates REM1.3 to restrict viral infection. *BioRxiv*, 205765.  
Google Scholar: [Author Only Title Only Author and Title](#)
- Pitorre, D., Llauro, C., Jobet, E., Guillemot, J., Brizard, J-P., Delseny, M., and Lasserre, E. (2010). RLK7, a leucine-rich repeat receptor-like kinase, is required for proper germination speed and tolerance to oxidative stress in *Arabidopsis thaliana*. *Planta* 232, 1339-1353.  
Google Scholar: [Author Only Title Only Author and Title](#)
- Qin, L., Zhou, Z., Li, Q., Zhai, C., Liu, L., Quilichini, T.D., Gao, P., Kessler, S.A., Jaillais, Y., Datla, R., et al. (2020). Specific Recruitment of Phosphoinositide Species to the Plant-Pathogen Interfacial Membrane Underlies *Arabidopsis* Susceptibility to Fungal Infection. *Plant Cell* 32, 1665-1688.  
Google Scholar: [Author Only Title Only Author and Title](#)
- Raasi, S., Orlov, I., Flemming, K.G., and Pickart, C.M. (2004). Binding of polyubiquitin chains to ubiquitin-associated (UBA) domains of HHR23A. *Journal of molecular biology* 341, 1367-1379.  
Google Scholar: [Author Only Title Only Author and Title](#)

- Rayapuram, N., Bigeard, J., Alhoraibi, H., Bonhomme, L., Hesse, A.M., Vinh, J., Hirt, H., and Pflieger, D. (2018). Quantitative Phosphoproteomic Analysis Reveals Shared and Specific Targets of Arabidopsis Mitogen-Activated Protein Kinases (MAPKs) MPK3, MPK4, and MPK6. *Mol Cell Proteomics* 17, 61-80.  
Google Scholar: [Author Only](#) [Title Only](#) [Author and Title](#)
- Revers, F., Guiraud, T., Houvenaghel, M.-C., Mauduit, T., Le Gall, O., and Candresse, T. (2003). Multiple resistance phenotypes to Lettuce mosaic virus among Arabidopsis thaliana accessions. *Molecular plant-microbe interactions* 16, 608-616.  
Google Scholar: [Author Only](#) [Title Only](#) [Author and Title](#)
- Reyes, F.C., Buono, R., and Otegui, M.S. (2011). Plant endosomal trafficking pathways. *Current opinion in plant biology* 14, 666-673.  
Google Scholar: [Author Only](#) [Title Only](#) [Author and Title](#)
- Rodrigues, O., Reshetnyak, G., Grondin, A., Saijo, Y., Leonhardt, N., Maurel, C., and Verdoucq, L. (2017). Aquaporins facilitate hydrogen peroxide entry into guard cells to mediate ABA- and pathogen-triggered stomatal closure. *Proceedings of the National Academy of Sciences* 114, 9200-9205.  
Google Scholar: [Author Only](#) [Title Only](#) [Author and Title](#)
- Romero-Barrios, N., and Vert, G. (2018). Proteasome-independent functions of lysine-63 polyubiquitination in plants. *The New phytologist* 217, 995-1011.  
Google Scholar: [Author Only](#) [Title Only](#) [Author and Title](#)
- Saracco, S.A., Hansson, M., Scaff, M., Walker, J.M., Smith, L.M., and Vierstra, R.D. (2009). Tandem affinity purification and mass spectrometric analysis of ubiquitylated proteins in Arabidopsis. *Plant J* 59, 344-358.  
Google Scholar: [Author Only](#) [Title Only](#) [Author and Title](#)
- Shannon, P., Markiel, A., Ozier, O., Baliga, N.S., Wang, J.T., Ramage, D., Amin, N., Schwikowski, B., and Ideker, T.J.G.r. (2003). Cytoscape: a software environment for integrated models of biomolecular interaction networks. *13*, 2498-2504.  
Google Scholar: [Author Only](#) [Title Only](#) [Author and Title](#)
- Shimizu, Y., Okuda-Shimizu, Y., and Hendershot, L.M. (2010). Ubiquitylation of an ERAD substrate occurs on multiple types of amino acids. *Molecular cell* 40, 917-926.  
Google Scholar: [Author Only](#) [Title Only](#) [Author and Title](#)
- Skubacz, A., Daszkowska-Golec, A., and Szarejko, L. (2016). The Role and Regulation of ABI5 (ABA-Insensitive 5) in Plant Development, Abiotic Stress Responses and Phytohormone Crosstalk. *Front Plant Sci* 7.  
Google Scholar: [Author Only](#) [Title Only](#) [Author and Title](#)
- Smalle, J., and Vierstra, R.D. (2004). The ubiquitin 26S proteasome proteolytic pathway. *Annual review of plant biology* 55, 555-590.  
Google Scholar: [Author Only](#) [Title Only](#) [Author and Title](#)
- Speth, E.B., Imboden, L., Hauck, P., and He, S.Y. (2009a). Subcellular localization and functional analysis of the Arabidopsis GTPase RabE. *Plant physiology* 149, 1824-1837.  
Google Scholar: [Author Only](#) [Title Only](#) [Author and Title](#)
- Speth, E.B., Imboden, L., Hauck, P., and He, S.Y. (2009b). Subcellular Localization and Functional Analysis of the Arabidopsis GTPase RabE. *149*, 1824-1837.  
Google Scholar: [Author Only](#) [Title Only](#) [Author and Title](#)
- Spoel, S.H., and Dong, X. (2012). How do plants achieve immunity? Defence without specialized immune cells. *Nature reviews Immunology* 12, 89-100.  
Google Scholar: [Author Only](#) [Title Only](#) [Author and Title](#)
- Stegmann, M., Anderson, R.G., Ichimura, K., Pecenkova, T., Reuter, P., Zarsky, V., McDowell, J.M., Shirasu, K., and Trujillo, M. (2012). The ubiquitin ligase PUB22 targets a subunit of the exocyst complex required for PAMP-triggered responses in Arabidopsis. *Plant Cell* 24, 4703-4716.  
Google Scholar: [Author Only](#) [Title Only](#) [Author and Title](#)
- Stringlis, I.A., Yu, K., Feussner, K., de Jonge, R., Van Bentum, S., Van Verk, M.C., Berendsen, R.L., Bakker, P.A., Feussner, I., and Pieterse, C.M. (2018). MYB72-dependent coumarin exudation shapes root microbiome assembly to promote plant health. *Proceedings of the National Academy of Sciences* 115, E5213-E5222.  
Google Scholar: [Author Only](#) [Title Only](#) [Author and Title](#)
- Su, J., Xu, J., and Zhang, S. (2015). RACK1, scaffolding a heterotrimeric G protein and a MAPK cascade. *Trends Plant Sci* 20, 405-407.  
Google Scholar: [Author Only](#) [Title Only](#) [Author and Title](#)
- Su, J., Yang, L., Zhu, Q., Wu, H., He, Y., Liu, Y., Xu, J., Jiang, D., and Zhang, S. (2018). Active photosynthetic inhibition mediated by MPK3/MPK6 is critical to effector-triggered immunity. *PLoS biology* 16, e2004122.  
Google Scholar: [Author Only](#) [Title Only](#) [Author and Title](#)
- Szklarczyk, D., Franceschini, A., Wyder, S., Forslund, K., Heller, D., Huerta-Cepas, J., Simonovic, M., Roth, A., Santos, A., Tsafou, K.P., et al. (2015). STRING v10: protein-protein interaction networks, integrated over the tree of life. *Nucleic Acids Res* 43, D447-452.  
Google Scholar: [Author Only](#) [Title Only](#) [Author and Title](#)
- Tan, X., Meyers, B.C., Kozik, A., West, M.A., Morgante, M., St Clair, D.A., Bent, A.F., and Michelmore, R.W. (2007). Global expression

analysis of nucleotide binding site-leucine rich repeat-encoding and related genes in Arabidopsis. *BMC Plant Biol* 7, 56.

Google Scholar: [Author Only](#) [Title Only](#) [Author and Title](#)

Tarutani, Y., Morimoto, T., Sasaki, A., Yasuda, M., Nakashita, H., Yoshida, S., Yamaguchi, I., and Suzuki, Y. (2004). Molecular characterization of two highly homologous receptor-like kinase genes, RLK902 and RKL1, in *Arabidopsis thaliana*. *Biosci Biotechnol Biochem* 68, 1935-1941.

Google Scholar: [Author Only](#) [Title Only](#) [Author and Title](#)

Thordal-Christensen, H. (2003). Fresh insights into processes of nonhost resistance. *Curr Opin Plant Biol* 6, 351-357.

Google Scholar: [Author Only](#) [Title Only](#) [Author and Title](#)

Tronchet, M., Balague, C., Kroj, T., Jouanin, L., and Roby, D. (2010). Cinnamyl alcohol dehydrogenases-C and D, key enzymes in lignin biosynthesis, play an essential role in disease resistance in *Arabidopsis*. *Molecular plant pathology* 11, 83-92.

Google Scholar: [Author Only](#) [Title Only](#) [Author and Title](#)

Trujillo, M., and Shirasu, K. (2010). Ubiquitination in plant immunity. *Current opinion in plant biology* 13, 402-408.

Google Scholar: [Author Only](#) [Title Only](#) [Author and Title](#)

Udeshi, N.D., Svinkina, T., Mertins, P., Kuhn, E., Mani, D.R., Qiao, J.W., and Carr, S.A. (2013). Refined Preparation and Use of Anti-diglycine Remnant (K-epsilon-GG) Antibody Enables Routine Quantification of 10,000s of Ubiquitination Sites in Single Proteomics Experiments. *Molecular & Cellular Proteomics* 12, 825-831.

Google Scholar: [Author Only](#) [Title Only](#) [Author and Title](#)

Urano, D., Chen, J.G., Botella, J.R., and Jones, A.M. (2013). Heterotrimeric G protein signalling in the plant kingdom. *Open Biol* 3, 120186.

Google Scholar: [Author Only](#) [Title Only](#) [Author and Title](#)

Üstün, S., Sheikh, A., Gimenez-Ibanez, S., Jones, A., Ntoukakis, V., and Börnke, F. (2016). The proteasome acts as a hub for plant immunity and is targeted by *Pseudomonas* type III effectors. *Plant Physiology* 172, 1941-1958.

Google Scholar: [Author Only](#) [Title Only](#) [Author and Title](#)

van Nocker, S., Walker, J.M., and Vierstra, R.D. (1996). The *Arabidopsis thaliana* UBC7/13/14 genes encode a family of multiubiquitin chain-forming E2 enzymes. *The Journal of biological chemistry* 271, 12150-12158.

Google Scholar: [Author Only](#) [Title Only](#) [Author and Title](#)

Vierstra, R.D. (2009). The ubiquitin-26S proteasome system at the nexus of plant biology. *Nat Rev Mol Cell Biol* 10, 385-397.

Google Scholar: [Author Only](#) [Title Only](#) [Author and Title](#)

Wang, J., Grubb, L.E., Wang, J., Liang, X., Li, L., Gao, C., Ma, M., Feng, F., Li, M., Li, L., et al. (2018). A Regulatory Module Controlling Homeostasis of a Plant Immune Kinase. *Molecular cell*.

Google Scholar: [Author Only](#) [Title Only](#) [Author and Title](#)

Wang, L., Wen, R., Wang, J., Xiang, D., Wang, Q., Zang, Y., Wang, Z., Huang, S., Li, X., and Datla, R.J.N.P. (2019). *Arabidopsis* UBC 13 differentially regulates two programmed cell death pathways in responses to pathogen and low-temperature stress. 221, 919-934.

Google Scholar: [Author Only](#) [Title Only](#) [Author and Title](#)

Wawrzynska, A., Rodibaugh, N.L., and Innes, R.W. (2010). Synergistic activation of defense responses in *Arabidopsis* by simultaneous loss of the GSL5 callose synthase and the EDR1 protein kinase. *Mol Plant Microbe Interact* 23, 578-584.

Google Scholar: [Author Only](#) [Title Only](#) [Author and Title](#)

Wen, R., Torres-Acosta, J.A., Pastushok, L., Lai, X., Pelzer, L., Wang, H., and Xiao, W. (2008). *Arabidopsis* UEV1D promotes Lysine-63-linked polyubiquitination and is involved in DNA damage response. *The Plant cell* 20, 213-227.

Google Scholar: [Author Only](#) [Title Only](#) [Author and Title](#)

Yao, C., Wu, Y., Nie, H., and Tang, D. (2012). RPN1a, a 26S proteasome subunit, is required for innate immunity in *Arabidopsis*. *The Plant journal : for cell and molecular biology* 71, 1015-1028.

Google Scholar: [Author Only](#) [Title Only](#) [Author and Title](#)

Yu, X., Feng, B., He, P., and Shan, L. (2017). From Chaos to Harmony: Responses and Signaling upon Microbial Pattern Recognition. *Annual review of phytopathology* 55, 109-137.

Google Scholar: [Author Only](#) [Title Only](#) [Author and Title](#)

Zamioudis, C., Hanson, J., and Pieterse, C.M. (2014).  $\beta$ -Glucosidase BGLU 42 is a MYB 72-dependent key regulator of rhizobacteria-induced systemic resistance and modulates iron deficiency responses in *Arabidopsis* roots. *New Phytologist* 204, 368-379.

Google Scholar: [Author Only](#) [Title Only](#) [Author and Title](#)

Zhao, J., Zhou, H., Zhang, M., Gao, Y., Li, L., Gao, Y., Li, M., Yang, Y., Guo, Y., and Li, X. (2016). Ubiquitin-specific protease 24 negatively regulates abscisic acid signalling in *Arabidopsis thaliana*. *Plant, cell & environment* 39, 427-440.

Google Scholar: [Author Only](#) [Title Only](#) [Author and Title](#)

Zhao, Y., Wu, G., Shi, H., and Tang, D. (2019). RECEPTOR-LIKE KINASE 902 Associates with and Phosphorylates BRASSINOSTEROID-SIGNALING KINASE1 to Regulate Plant Immunity. *Mol Plant* 12, 59-70.

Google Scholar: [Author Only](#) [Title Only](#) [Author and Title](#)

**Zhou, B., and Zeng, L. (2017). Conventional and unconventional ubiquitination in plant immunity. *Molecular plant pathology* 18, 1313-1330.**

Google Scholar: [Author Only](#) [Title Only](#) [Author and Title](#)

**Zhou, J.-M., and Zhang, Y. (2020). Plant Immunity: Danger Perception and Signaling. *Cell*.**

Google Scholar: [Author Only](#) [Title Only](#) [Author and Title](#)

**Zhou, J., He, P., and Shan, L. (2014). Ubiquitination of plant immune receptors. *Methods Mol Biol* 1209, 219-231.**

Google Scholar: [Author Only](#) [Title Only](#) [Author and Title](#)

**Zhou, J., Liu, D., Wang, P., Ma, X., Lin, W., Chen, S., Mishev, K., Lu, D., Kumar, R., Vanhoutte, I., et al. (2018). Regulation of Arabidopsis brassinosteroid receptor BRI1 endocytosis and degradation by plant U-box PUB12/PUB13-mediated ubiquitination. *Proc Natl Acad Sci U S A* 115, E1906-E1915.**

Google Scholar: [Author Only](#) [Title Only](#) [Author and Title](#)

**Zhou, J., Lu, D., Xu, G., Finlayson, S.A., He, P., and Shan, L. (2015). The dominant negative ARM domain uncovers multiple functions of PUB13 in Arabidopsis immunity, flowering, and senescence. *J Exp Bot* 66, 3353-3366.**

Google Scholar: [Author Only](#) [Title Only](#) [Author and Title](#)
